# Supplementary material
Source: Research Square preprint supplement (doi:10.21203/rs.3.rs-8279190/v1)
Supplement: Supplementary file 1 [file 29a8262cc568b8fd7702e544.xlsx]

## Sheet: Index
Table	Description
ST1	Summary of FDA-approved SSRI and SNRI treatments by their active moieties.
ST2	Articles included for scoping-review. PubMed Search Terms: "Microbiome AND active moiety". Search date: 18 May 2025. Total: 158 references, 57 meeting inclusion criteria.
ST3	Mapping of reactions predicted by MicrobeRX (confidence value > 1.0) to organisms and genes using information from A) AGORA2, B) VMH, and C) KEGG models. Note: for AGORA2 all reactions were remapped to include protein Entrez id's (Home - Protein - NCBI). In case genes from AGORA2 could not be mapped, the original ID was included in the data. Fields marked with "gap_fill" indicate that the reactio…
ST4	Prokaryotic enzymes described in the literature to perform reactions associated with the synthesis and degradation of TRP metabolites.
ST5	Fraction of genomes containing each metabolic conversion within each gut-associated genus: A) indoles, B) serotonin, C) kynurine.
ST6	Prioritization of taxa with the most significant functional potential for each metabolite conversion using combined scores: A) indoles, B) serotonin, C) kynurine.

## Sheet: ST1_FDA-approved SSRIs-SNRIs
Summary of FDA-approved SSRI and SNRI treatments by their active moieties.
Active moiety	Class	Brand name	Approved adult treatment regimen	NDA #, company	Primary route of metabolite elimination	Catalyzing enzymes; primary in bold	Structural formula of the active moiety (PubChem CID); COD/CCDC entry if crystal structure available
Citalopram	SSRI	Celexa	20-40 mg/day for MDD.	020822, AABVIE	Demethylcitalopram (DCT), didemethylcitalopram (DDCT), citalopram-N-oxide, and a deaminated propionic acid derivative.	CYP3A4 and CYP2C19.	C20H21FN2O (2771)
Escitalopram	SSRI	Lexapro	10-20 mg/day for MDD and GAD.	021323, ABBVIE	S-desmethylcitalopram (S-DCT) and S-didesmethylcitalopram (S-DDCT).	CYP3A4 and CYP2C19.	C20H21FN2O (146570)
Paroxetine	SSRI	Paxil/Paxil CR	Paxil: 20-50 mg/day for MDD and PTSD, 20-60 mg for OCD, 10-60 mg for PD, 20 mg starting dose for SAD and GAD. Paxil CR: 25-62.5 mg/day for MDD, 12.5-75 mg/day for PD, 12.5-37.5 mg/day for SAD, 12.5-25 mg/day for PMDD.	Paxil: 020031, APOTEX; Paxil CR: 020936, APOTEX	Polar and conjugated products of oxidation and methylation, which are readily cleared. Conjugates with glucuronic acid and sulfate predominate, and major metabolites have been isolated and identified.	CYP2D6.	C19H20FNO3 (43815)
Fluoxetine	SSRI	Prozac	20 mg/day starting dose for MDD and OCD, 60 mg/day for BN, 10 mg/day starting dose for PD; 20 mg/day for BD and TDR treatment i.c.w. 5 mg/day of oral Olanzapine.	018936, ELI LILLY AND CO	Norfluoxetine and a number of other unidentified metabolites.	CYP2D6.	C17H18F3NO (3386)
Vortioxetine	SSRI	Trintellix	10-20 mg/day for MDD.	204447, TAKEDA PHARMS USA	Carboxylic acid (inactive).	CYP2D6, CYP3A4/5, CYP2C19, CYP2C9, CYP2A6, CYP2C8, and CYP2B6.	C18H22N2S (9966051); COD-2311290
Vilazodone	SSRI	Viibryd	20-40 mg/day for MDD.	022567, ABBVIE	Not specified.	CYP3A4, CYP2C19 and CYP2D6.	C26H27N5O2 (6918314)
Sertraline	SSRI	Zoloft	50-200 mg/day for MDD and OCD, 25-200 mg/day for PD, PTSD and SAD, 50-100 mg/day for PMDD.	019839, 020990, VIATRIS	N-desmethylsertraline.	CYP2D6.	C17H17Cl2N (68617); CCDC-783700
Duloxetine	SNRI	Cymbalta	40-120 mg/day for MDD, 60-120 mg/day for GAD, 60 mg/day for DPNP, 30-60 mg/day for FM and CMP.	021427, LILLY	4-hydroxy duloxetine glucuronide and 5-hydroxy-6-methoxy duloxetine sulfate.	CYP1A2 and CYP2D6.	C18H19NOS (60835)
Venlafaxine	SNRI	Effexor XR	37.5-75 mg/day for MDD, GAD and PD, 75 mg/day for SAD.	020699, UPJOHN	O-desmethylvenlafaxine (ODV), N-desmethylvenlafaxine, N,O-didesmethylvenlafaxine, and other minor metabolites.	CYP2D6.	C17H27NO2 (5656)
Levomilnacipran	SNRI	Fetzima	20-120 mg/day for MDD.	204168, ABBVIE	Desethyl levomilnacipran and p-hydroxy-levomilnacipran.	CYP3A4, CYP2C8, CYP2C19, CYP2D6, and CYP2J2.	C15H22N2O (6917779)

## Sheet: ST2_articles_overview
No.	First author (year)	PMID	Study type	Clinical diagnosis (human) or stress model/situation (animal)	Study size (stress, stress+medication)	Medication dose (duration)	Microbial activity and profiling analysis (sample)	Host tryptophan-pathway analysis (sample)	Host lipopolysaccharid analysis (sample)
CITALOPRAM
1	Chauveau et al. (2023)	37027987	In vitro batch fermentation of human gut microbiota (PolyFermS system)		N = 2 fecal samples of healthy donors	30 µg/ml or 500 µg/ml	UHPLC-MS/MS: citalopram (in vitro model of human gut microbiota)
2	Ruciński et al. (2025)	40362590	Animal (rats)	Central nucleus of the Amygdala (CeA) stimulation	N = 48 (8 CeA, 8 CeA + Citalopram)	10 mg/kg/day (2 weeks)	MALDI-TOF (colon inoculated onto blood and Bifidobacterium-growth enabling media)
3	Deng et al. (2021)	33535879	Animal (mice)	Chronic restraint stress (CRS)	N = 40 (20 CRS, 10 CRS + Citalopram)	10 mg/kg/day (3 weeks)	16S rRNA sequencing (feces)	UHPLC: TRP, KYN, 3-HK, 3-HAA, 5-HT, 5-HIAA (serum); TRP, KYN, 3-HK, 3-HAA, 5-HT, 5-HIAA, NAS, MLT (duodenum, jejunum, ileum); TRP, KYN, 5-HT, 5-HIAA, 5-HIAA/5-HT (PFC); TRP, KYN, 3-HK, 5-HT, 5-HIAA (hippocampus)
ESCITALOPRAM
1	Wang et al. (2023)	37641148	Clinical	Major depressive disorder (MDD)	N = 276 (110 MDD, 110 MDD + Escitalopram)	5-20 mg/day (12 weeks)	Shotgun sequencing (feces)	GC-MS: untargeted (feces, plasma)
2	Brydges et al. (2021)	34697401	Clinical	Major depressive disorder (MDD)	N = 124 (124 MDD, 46 MDD + Escitalopram)	10-20 mg/day (12 weeks)	16S rRNA sequencing (feces)	GC-MS: primary and polar metabolites (serum)
3	Shen et al. (2021)	34290352	Clinical	Major depressive disorder (MDD)	N = 60 (30 MDD, 30 MDD + Escitalopram)	5-20 mg/day (6 weeks)	16S rRNA sequencing (feces)
4	Karsten et al. (2025)	40176389	Animal (mice)	Large nest building (LNB) as naturalistic animal model of compulsive-like behavior	N = 48 (12 LNB, 12 LNB + Escitalopram)	50 mg/kg/day (5 weeks)	16S rRNA sequencing (feces)		ELISA: LPS and LBP (plasma)
5	Duan et al. (2025)	39962083	Animal (rats)	Unspecified depression (DEP) model	N = 24 (8 DEP, 8 DEP + Escitalopram)	10 mg/kg/day (3 weeks)	16S rRNA sequencing (feces)	LC-MS/MS: untargeted metabolome (serum) and proteome (hippocampus)
6	Duan et al. (2021)	34016954	Animal (mice)	Chronic unpredictable mild stress (CUMS)	N = 151 (151 CUMS, 151 CUMS + Escitalopram)	10 mg/kg/day (4 weeks)	16S rRNA sequencing (feces)	GC-MS: metabolome (plasma)
CITALOPRAM/ESCITALOPRAM
1	Bhattacharyya et al. (2019)	31273200	Clinical	Major depressive disorder (MDD)	N = 290 (290 MDD, 290 MDD + Escitalopram/Citalopram)	medication dose not specified (8 weeks)		LCECA: 3-OHKY, 5-HIAA, 5-HTP, I3AA, KYN, 5-HT, TRP (plasma)
FLUOXETINE
1	Ding et al. (2025)	40462285	In vitro microbial cultures from stool samples (mice)		N = 3 (1 donor E. coli strain, 1 recipient bacteria from mice feces, 1 combined mating culture)	0.01, 0.1, 1.0, 5.0, 10.0, 50.0 and 100.0 mg/l	16S RNA gene sequencing (cultivated mouse fecal bacteria exposed to ARG-carrying E. coli plasmids), followed by PCR to confirm plasmid transfers
2	Ma et al. (2021)	33806510	In vitro microbial cultures from stool samples (rats)		N = 1 intestinal bacterial culture from rat colon	50 and 100 μM	UHPLC-MS/MS: neurotransmitters and related metabolites of the phe, tryp, and glutamic acid pathways (colon culture)
3	Wu et al. (2024)	38006809	In vitro microbial culture(s)		N = 1 strain (E. coli)	100 mg/l	RT-qPCR: 16S, efflux pump AcrA/B-TolC, outer membrane proteins OmpC/F and superoxide response genes SoxS/ SodA; western blot: OmpF (E. coli)
4	Ou et al. (2022)	36374097	In vitro microbial culture(s)		N = 2 strains (E. coli)	120 to 180 μM	PCR and agar gel electrophoresis: efflux pump AcrA/B-TolC and MarA (fluoxetine-resistant E. coli with marR mutations)
5	Wu et al. (2022)	36054995	In vitro microbial culture(s)		N = 1 strain (E. coli)	100 mg/l	RT-qPCR: 16S, efflux pump AcrA/B-TolC, outer membrane proteins OmpC/F and superoxide response genes SoxS/ SodA; Hoechst accumulation assay (E. coli)
6	Fung et al. (2019)	31477894	In vitro microbial culture(s)		N = 2 strains (T. sanguinis, B. thetaiotaomicron)	~130 μM	transporter activity assays: APP+ (OCT-like transporter), [3H]5-HT, [3H]NE and [3H]Trp (T. sanguinis and B. theta cells)
7	Lyte and Brown (2018)	29324833	In vitro microbial culture(s)		N = 2 strains (L. salivarius, L. rhamnosus)	0.3125, 0.625, 1.25 and 2.5 mM	ASP+ (OCT-like transporter) and IDT307 (PMAT-like transporter) fluorescence-based assays (L. salivarius biofilms)
8	Ma et al. (2025)	40124394	Animal (rats)	Chronic unpredictable mild stress (CUMS)	N = 30 (30 CUMS, 30 CUMS + Fluoxetine)	1.8 mg/kg/day (3 weeks)	16S rRNA sequencing (feces)
9	Lee et al. (2025)	39671722	Animal (mice)	Lipopolysaccharid-induced stress (LPS)	N = 42 (6 LPS, 6 LPS + Fluoxetine, 6 LPS + fluoxetine after vagotomization)	12 mg/kg/day (6 days)	16S rRNA sequencing (feces)		LPS administration (from E. coli)
10	Kwofie et al. (2024)	39307413	Animal (rats)	Chronic unpredictable mild stress (CUMS)	N = 42 (6 CUMS, 6 CUMS + Fluoxetine)	12 mg/kg/day (4 weeks)	16S rRNA sequencing (feces)
11	Liang et al. (2025)	39136837	Animal (rats)	Chronic unpredictable mild stress (CUMS)	N = 54 (9 CUMS, 9 CUMS + Fluoxetine)	2 mg/kg/day (3 weeks)	16S rRNA sequencing (feces)
12	Dong et al. (2024)	38422651	Animal (rats)	Prenatal stress (PS) restraint stress protocol	N = 78 (24 PS, 8 PS + Fluoxetine)	10 mg/kg/day (3 weeks)	16S rRNA sequencing (feces)	UPLC-MS/MS: untargeted but including D-TRP, I3A, IAAcr (serum), HIAA (feces)
13	Szala-Rycaj et al. (2023)	37432210	Animal (mice)	Chronic unpredictable mild stress (CUMS)	N = 35 (7 CUMS, 7 CUMS + Fluoxetine)	12 mg/kg/day (3 weeks)	16S rRNA sequencing (feces)
14	Pawluski et al. (2023)	37129177	Animal (rats)	Gestational stress (GS)	N = 39 (11 GS, 13 GS + Fluoxetine)	10 mg/kg/day (3+ weeks)	16S rRNA sequencing (colon feces)
15	Xu et al. (2023)	36812493	Animal (mice)	Chronic unpredictable mild stress (CUMS)	N = 32 (8 CUMS, 8 CUMS + Fluoxetine)	10 mg/kg/day (8 weeks)	16S rRNA sequencing (colon feces)	HPLC-UV: TRP, 5-HT, KYN (serum, hippocampus)	ELISA: LPS (serum)
16	Huang et al. (2023)	36343797	Animal (mice)	Chronic unpredictable mild stress (CUMS)	N = 36-48 (6-8 UCMS, 8 UCMS + Fluoxetine)	20 mg/kg/day (4 weeks)	16S rRNA sequencing (feces)
17	Dong et al. (2022)	36120376	Animal (mice)	Chronic unpredictable mild stress (CUMS)	N = 30 (10 CUMS, 5 CUMS + Fluoxetine)	20 mg/kg/day (4 weeks)	16S rRNA sequencing (feces)
18	Gao et al. (2022)	35006225	Animal (mice)	Chronic unpredictable mild stress (CUMS)	N = 40 (10 CUMS, 10 CUMS + Fluoxetine)	10 mg/kg/day (5 weeks)	16S rRNA sequencing (feces)	HPLC: 5-HTP (serum, hippocampus, colon), 5-HT (hippocampus)
19	Zhang et al. (2021A)	34236293	Animal (mice)	Chronic unpredictable mild stress (CUMS)	N = 72 (12 CUMS, 12 CUMS + Fluoxetine)	2.6 mg/kg/day (2 weeks)	16S rRNA sequencing (feces)
20	Chen et al. (2021)	34125489	Animal (mice)	Chronic unpredictable mild stress (CUMS)	N = 60 (30 CUMS, CUMS + Fluoxetine not specified)	1 mg/kg/day (4 weeks)	16S rRNA sequencing (feces)
21	Zhang et al. (2021B)	33602895	Animal (rats)	Chronic unpredictable mild stress (CUMS)	N = 48 (6 CUMS, 6 CUMS + Fluoxetine)	12 mg/kg/day (6 weeks)	16S rRNA sequencing, shotgun sequencing (feces)
22	Feng et al. (2020)	32774410	Animal (rats)	Chronic unpredictable mild stress (CUMS)	N = 36 (6 CUMS, 6 CUMS + Fluoxetine)	3.33 mg/kg/day (4 weeks)	16S rRNA sequencing (colon feces)
23	Egerton et al. (2022)	32734823	Animal (rats)	Early life stress (ELS) - maternal separation	N = 58 (12 ELS, 12 ELS + Fluoxetine)	10 mg/kg/day (8 weeks)	16S rRNA sequencing (feces)
24	Cao et al. (2020)	32592887	Animal (mice)	Chronic unpredictable mild stress (CUMS)	N = 72 (8 CUMS, 8 CUMS + Fluoxetine)	4 mg/kg/day (1 week)	16S rRNA sequencing (feces)
25	Liu et al. (2020)	32006344	Animal (mice)	Chronic immobilization stress (ICS)	N = 40 (10 ICS, 10 ICS + Fluoxetine)	10 mg/kg/day (8 weeks)	16S rRNA sequencing (feces)
26	Ramsteijn et al. (2020)	31971855	Animal (rats)	Early life stress (ELS) - maternal separation	N = 92 (13 ELS, 25 ELS + Fluoxetine)	10 mg/kg/day (>5 weeks)	16S rRNA sequencing (feces)
27	Chi et al. (2020)	31896054	Animal (rats)	Chronic unpredictable mild stress (CUMS)	N = 62 (12 CUMS, 12 CUMS + Fluoxetine)	10 mg/kg/day (3 weeks)	16S rRNA sequencing (feces)
28	Sun et al. (2019)	31588192	Animal (mice)	Chronic unpredictable mild stress (CUMS)	N = 30 (10 CUMS, 10 CUMS + Fluoxetine)	12 mg/kg/day (3 weeks)	16S rRNA sequencing (feces)
29	Zhou et al. (2021)	31415771	Animal (rats)	Olfactory bulbectomy (OBX)	N = 24 (8 OBX, 8 OBX + Fluoxetine)	10 mg/kg/day (2 weeks)		UPLC-Q-TOF/MS: metabolome (urine)
30	Gao et al. (2013)	22975930	Animal (rats)	Chronic unpredictable mild stress (CUMS)	N = 56 (8 CUMS, 8 CUMS + Fluoxetine HCl)	6 mg/kg/day (3 weeks)		UPLC-MS: untargeted including XA, KYNA, TRP, IAA, IS (urine)
PAROXETINE
1	Zhang et al. (2025)	39696778	Animal (mice)	Chronic ulcerative colitis (CUC) + Chronic unpredictable mild stress (CUMS)	N = 60 (10 CUC + CUMS, 10 CUC + CUMS + Paroxetine)	2 mg/kg/day (6 weeks)	qPCR (feces)
2	Liu et al. (2024)	38346646	Animal (rats)	Chronic unpredictable mild stress (CUMS)	study size not specified	5 mg/kg/day (4 weeks)	16S rRNA sequencing (feces)
3	Yang et al. (2022)	35085691	Animal (rats)	Postpartum depression (PPD) - maternal separation	N = 32 (8 PPD, 8 PPD + Paroxetine)	1.8 mg/kg/day (26 days)	16S rRNA sequencing (colon feces)
4	Li et al. (2021)	33913925	Animal (rats)	Chronic unpredictable mild stress (CUMS)	N = 24 (6 CUMS, 6 CUMS + Paroxetine)	1.8 mg/kg/day (4 weeks)	RT-PCR (cecum)
SERTRALINE
1	Ding et al. (2025)	40462285	In vitro microbial cultures from stool samples (mice)		N = 3 (1 donor E. coli strain, 1 recipient bacteria from mice feces, 1 combined mating culture)	0.01, 0.1, 1.0, 5.0, 10.0, 50.0 and 100.0 mg/l	16S RNA gene sequencing (cultivated mouse fecal bacteria exposed to ARG-carrying E. coli plasmids), followed by PCR to confirm plasmid transfers
2	Ma et al. (2021)	33806510	In vitro microbial cultures from stool samples (rats)		N = 1 intestinal bacterial culture from rat colon	50 and 100 μM	UHPLC-MS/MS: neurotransmitters and related metabolites of the phe, tryp, and glutamic acid pathways (colon culture)
3	Zhou et al. (2023)	37386523	Clinical	Depressive (DEP) adolescents	N = 35 (10 HC, 25 DEP)	medication dose and duration not specified	16S rRNA sequencing (feces)	UHPLC-MS/MS: KP metabolites (serum, urine); ELISA: 5-HT, TRP, KYN, KYNA, QA, NAD+ (serum, urine)
4	Qiao et al. (2024)	39128797	Animal (mice)	Chronic restraint and unpredictable mild stress (CRS + CUMS)	N = 48 (8 CRS + CUMS, 8 CRS + CUMS + Sertraline)	7.6 mg/kg/day (2 weeks)			ELISA: LPS (serum)
5	Qiao et al. (2022)	36120298	Animal (mice)	Chronic restraint and unpredictable mild stress (CRS + CUMS)	N = 70 (10 CRS + CUMS, 10 CRS + CUMS + Sertraline)	7.6 mg/kg/day (3 weeks)	16S rRNA sequencing (rectal contents)
VORTIOXETINE
1	Ye et al. (2021)	34025474	Clinical	Major depressive disorder (MDD)	N = 54 (26 MDD, 26 MDD + Vortioxetine)	10 mg/day (8 weeks)	16S rRNA sequencing (feces)
DULOXETINE
1	Ding et al. (2025)	40462285	In vitro microbial cultures from stool samples (mice)		N = 3 (1 donor E. coli strain, 1 recipient bacteria from mice feces, 1 combined mating culture)	0.01, 0.1, 1.0, 5.0, 10.0, 50.0 and 100.0 mg/l	16S RNA gene sequencing (cultivated mouse fecal bacteria exposed to ARG-carrying E. coli plasmids), followed by PCR to confirm plasmid transfers
2	Klünemann et al. (2021)	34497420	In vitro microbial culture(s)		N = 1 culture of 5 species (B. thetaiotaomicron, E. rectale, L. gasseri, R. torques, S. salivarius)	50 μM	16S rRNA sequencing, flow-injection MS Orbitrap: untargeted, HILIC LC–MS and LC–MS/MS: untargeted (five-species co-cultures grown with duloxetine)
3	Brydges et al. (2021)	34697401	Clinical	Major depressive disorder (MDD)	N = 124 (124 MDD, 44 MDD + Duloxetine)	30-60 mg/day (12 weeks)	16S rRNA sequencing (feces)	GC-MS: primary and polar metabolites (serum)
4	Zhang et al., 2019	30681503	Clinical	Diarrhea-predominant irritable bowel syndrome (IBS-D) and depression (DEP)	N = 14 (14 IBS-D + DEP, 6 IBS-D + DEP + Duloxetine)	30-60 mg/day (8 weeks)	16S rRNA sequencing (feces)
VENLAFAXINE
1	Du et al. (2024)	38899045	Animal (mice)	Cuprizone-induced depression (CPZ)	N = 30 (10 CPZ, 10 CPZ + Venlaxafine)	20 mg/kg/day (2 weeks)	16S rRNA sequencing (feces)
2	Shen et al. (2023)	36963638	Animal (mice)	Chronic unpredictable mild stress (CUMS)	N = 30 (10 CUMS, 10 CUMS + Venlafaxine)	12.5 mg/kg/day (5 weeks)		LC-MS/MS: 5-HT, 5-HIAA (serum, hippocampus)
3	Gao et al. (2013)	22975930	Animal (rats)	Chronic unpredictable mild stress (CUMS)	N = 56 (8 CUMS, 8 CUMS + Venlafaxine HCl)	25 mg/kg/day (3 weeks)		UPLC-MS: untargeted including XA, KYNA, TRP, IAA, IS (urine)

## Sheet: ST3A_AGORA2_reactions
Organism	DGLTAH	VCNH	HBZOPT	SDPNPT	NGNDMAT	TRPO2	DVPROTOCHLOROPH1	NTHTR	L_ARONR	AGALGT	QNTHCT
Abiotrophia_defectiva_ATCC_49176			gap_fill
Acaricomes_phytoseiuli_DSM_14247			gap_fill			(WP_018135277.1 or WP_018134487.1)			WP_245532386.1
Acaryochloris_marina_MBIC11017			WP_012163985.1	WP_012163985.1			WP_012162230.1		WP_012163373.1
Acetanaerobacterium_elongatum_CGMCC_1_5012			gap_fill
Acetatifactor_muris_GP69			gap_fill
Acetivibrio_ethanolgignens_ACET_33324			gap_fill
Acetobacterium_wieringae_DSM_1911			gap_fill
Acetonema_longum_DSM_6540			gap_fill
Achromobacter_xylosoxidans_A8			WP_041656878.1			WP_013392448.1
Achromobacter_xylosoxidans_NBRC_15126			WP_006389677.1			WP_006388311.1
Achromobacter_xylosoxidans_NCTC10807			WP_006389677.1	WP_006389677.1		WP_006388311.1
Acidaminobacter_hydrogenoformans_DSM_2784			gap_fill
Acidaminococcus_intestini_RyC_MR95			gap_fill
Acidaminococcus_massiliensis_Marseille_P2828			gap_fill
Acidaminococcus_sp_BV3L6			gap_fill
Acidaminococcus_sp_HPA0509			gap_fill
Acidobacterium_ailaaui_PMMR2			gap_fill			WP_026441742.1
Acidobacterium_capsulatum_ATCC_51196			gap_fill
Acidovorax_caeni_R_24608			WP_054257995.1	WP_054257995.1
Acinetobacter_baumannii_1656_2			WP_000205472.1	WP_000205472.1
Acinetobacter_baumannii_3990			WP_000205474.1	WP_000205474.1
Acinetobacter_baumannii_48055			WP_000205472.1	WP_000205472.1
Acinetobacter_baumannii_53264			WP_000205472.1	WP_000205472.1
Acinetobacter_baumannii_6013113			WP_000205474.1	WP_000205474.1
Acinetobacter_baumannii_6013150			WP_000205474.1	WP_000205474.1
Acinetobacter_baumannii_6014059			WP_000205472.1	WP_000205472.1
Acinetobacter_baumannii_AA_014			WP_000205472.1	WP_000205472.1
Acinetobacter_baumannii_AB0057			WP_000205474.1
Acinetobacter_baumannii_Ab11111			WP_000205475.1	WP_000205475.1
Acinetobacter_baumannii_AB1H8			WP_000205472.1	WP_000205472.1
Acinetobacter_baumannii_AB210			WP_000205472.1	WP_000205472.1
Acinetobacter_baumannii_AB307_0294			WP_000205474.1	WP_000205474.1
Acinetobacter_baumannii_AB31			WP_000205472.1	WP_000205472.1
Acinetobacter_baumannii_Ab33333			WP_000205472.1	WP_000205472.1
Acinetobacter_baumannii_AB405E4			WP_000205472.1	WP_000205472.1
Acinetobacter_baumannii_Ab44444			WP_000205472.1	WP_000205472.1
Acinetobacter_baumannii_AB4A3			WP_000205472.1	WP_000205472.1
Acinetobacter_baumannii_AB5256			WP_000205468.1	WP_000205468.1
Acinetobacter_baumannii_AB5711			WP_000205472.1	WP_000205472.1
Acinetobacter_baumannii_AB900			WP_000205472.1	WP_000205472.1
Acinetobacter_baumannii_ABIsac_ColiR			WP_000205472.1	WP_000205472.1
Acinetobacter_baumannii_ABNIH1			WP_000205472.1	WP_000205472.1
Acinetobacter_baumannii_ABNIH11			WP_000205474.1	WP_000205474.1
Acinetobacter_baumannii_ABNIH14			WP_000205472.1	WP_000205472.1
Acinetobacter_baumannii_ABNIH15			WP_000205472.1	WP_000205472.1
Acinetobacter_baumannii_ABNIH16			WP_000205472.1	WP_000205472.1
Acinetobacter_baumannii_ABNIH18			WP_000205472.1	WP_000205472.1
Acinetobacter_baumannii_ABNIH19			WP_000205474.1	WP_000205474.1
Acinetobacter_baumannii_ABNIH22			WP_000205472.1	WP_000205472.1
Acinetobacter_baumannii_ABNIH23			WP_000205472.1	WP_000205472.1
Acinetobacter_baumannii_ABNIH25			WP_000205472.1	WP_000205472.1
Acinetobacter_baumannii_ABNIH26			WP_000205472.1	WP_000205472.1
Acinetobacter_baumannii_ABNIH3			WP_000205472.1	WP_000205472.1
Acinetobacter_baumannii_ABNIH4			WP_000205472.1	WP_000205472.1
Acinetobacter_baumannii_AB_1536_8			WP_000205472.1	WP_000205472.1
Acinetobacter_baumannii_AB_1582_8			WP_000205472.1	WP_000205472.1
Acinetobacter_baumannii_AB_1594_8			WP_000205472.1	WP_000205472.1
Acinetobacter_baumannii_AB_1595_8			WP_000205472.1	WP_000205472.1
Acinetobacter_baumannii_AB_1649_8			WP_000205472.1	WP_000205472.1
Acinetobacter_baumannii_AB_1650_8			WP_000205472.1	WP_000205472.1
Acinetobacter_baumannii_AB_1766_8			WP_000205472.1	WP_000205472.1
Acinetobacter_baumannii_AB_2007_09_110_01_7			WP_000205472.1	WP_000205472.1
Acinetobacter_baumannii_AB_2007_16_25_01_7			WP_000205472.1	WP_000205472.1
Acinetobacter_baumannii_AB_2007_16_27_01			WP_000205472.1	WP_000205472.1
Acinetobacter_baumannii_AB_2008_15_34_7			WP_000205472.1	WP_000205472.1
Acinetobacter_baumannii_AB_2008_15_45			WP_000205472.1	WP_000205472.1
Acinetobacter_baumannii_AB_2008_15_52			WP_000205472.1	WP_000205472.1
Acinetobacter_baumannii_AB_2008_15_69			WP_000205472.1	WP_000205472.1
Acinetobacter_baumannii_AB_2008_15_70			WP_000205472.1	WP_000205472.1
Acinetobacter_baumannii_AB_2008_23_01_01_7			WP_000205472.1	WP_000205472.1
Acinetobacter_baumannii_AB_2009_04_01_7			WP_000205472.1	WP_000205472.1
Acinetobacter_baumannii_AB_2009_04_02_7			WP_000205475.1	WP_000205475.1
Acinetobacter_baumannii_AB_515_8			WP_000205472.1	WP_000205472.1
Acinetobacter_baumannii_AB_908_12			WP_000205475.1	WP_000205475.1
Acinetobacter_baumannii_AB_908_13			WP_000205470.1	WP_000205470.1
Acinetobacter_baumannii_AB_909_01_7			WP_000205472.1	WP_000205472.1
Acinetobacter_baumannii_AB_909_02_7			WP_000205470.1	WP_000205470.1
Acinetobacter_baumannii_AB_909_05			WP_000205472.1	WP_000205472.1
Acinetobacter_baumannii_AB_TG19617			WP_000205472.1	WP_000205472.1
Acinetobacter_baumannii_AB_TG2018			WP_000205472.1	WP_000205472.1
Acinetobacter_baumannii_AB_TG2022			WP_000205472.1	WP_000205472.1
Acinetobacter_baumannii_AB_TG2023			WP_000205472.1	WP_000205472.1
Acinetobacter_baumannii_AB_TG2026			WP_000205472.1	WP_000205472.1
Acinetobacter_baumannii_AB_TG2028			WP_000205474.1	WP_000205474.1
Acinetobacter_baumannii_AB_TG2030			WP_000205474.1	WP_000205474.1
Acinetobacter_baumannii_AB_TG2031			WP_000205474.1	WP_000205474.1
Acinetobacter_baumannii_AB_TG27335			WP_000205472.1	WP_000205472.1
Acinetobacter_baumannii_AB_TG27339			WP_000205472.1	WP_000205472.1
Acinetobacter_baumannii_AB_TG27343			WP_000205474.1	WP_000205474.1
Acinetobacter_baumannii_ACICU			WP_000205474.1	WP_000205474.1
Acinetobacter_baumannii_ANC_4097			WP_000205474.1	WP_000205474.1
Acinetobacter_baumannii_ATCC_17978			WP_000205474.1	WP_000205474.1
Acinetobacter_baumannii_ATCC_19606			WP_000205472.1	WP_000205472.1
Acinetobacter_baumannii_BZICU_2			WP_000205472.1	WP_000205472.1
Acinetobacter_baumannii_Canada_BC1			WP_000205474.1	WP_000205474.1
Acinetobacter_baumannii_Canada_BC_5			WP_000205474.1	WP_000205474.1
Acinetobacter_baumannii_IS_116			WP_000205472.1	WP_000205472.1
Acinetobacter_baumannii_IS_123			WP_000205474.1	WP_000205474.1
Acinetobacter_baumannii_IS_143			WP_000205474.1	WP_000205474.1
Acinetobacter_baumannii_IS_235			WP_000205474.1	WP_000205474.1
Acinetobacter_baumannii_IS_251			WP_000205474.1	WP_000205474.1
Acinetobacter_baumannii_IS_58			WP_000205474.1	WP_000205474.1
Acinetobacter_baumannii_LAC_4			WP_000205470.1	WP_000205470.1
Acinetobacter_baumannii_MDR_TJ			WP_000205472.1	WP_000205472.1
Acinetobacter_baumannii_MDR_ZJ06			WP_000205472.1	WP_000205472.1
Acinetobacter_baumannii_MSP4_16			WP_000205472.1	WP_000205472.1
Acinetobacter_baumannii_Naval_113			WP_000205472.1	WP_000205472.1
Acinetobacter_baumannii_Naval_13			WP_000205474.1	WP_000205474.1
Acinetobacter_baumannii_Naval_17			WP_000205472.1	WP_000205472.1
Acinetobacter_baumannii_Naval_2			WP_000205472.1	WP_000205472.1
Acinetobacter_baumannii_Naval_21			WP_000205474.1	WP_000205474.1
Acinetobacter_baumannii_Naval_57			WP_000205472.1	WP_000205472.1
Acinetobacter_baumannii_Naval_72			WP_000205471.1	WP_000205471.1
Acinetobacter_baumannii_Naval_78			WP_000205472.1	WP_000205472.1
Acinetobacter_baumannii_Naval_81			WP_000205474.1	WP_000205474.1
Acinetobacter_baumannii_Naval_82			WP_000205472.1	WP_000205472.1
Acinetobacter_baumannii_Naval_83			WP_000205474.1	WP_000205474.1
Acinetobacter_baumannii_NIPH_1362			WP_000205472.1	WP_000205472.1
Acinetobacter_baumannii_NIPH_146			WP_000205472.1	WP_000205472.1
Acinetobacter_baumannii_NIPH_1669			WP_000205474.1	WP_000205474.1
Acinetobacter_baumannii_NIPH_1734			WP_000205472.1	WP_000205472.1
Acinetobacter_baumannii_NIPH_190			WP_000205472.1	WP_000205472.1
Acinetobacter_baumannii_NIPH_201			WP_000205472.1	WP_000205472.1
Acinetobacter_baumannii_NIPH_2061			WP_000205472.1	WP_000205472.1
Acinetobacter_baumannii_NIPH_24			WP_000205472.1	WP_000205472.1
Acinetobacter_baumannii_NIPH_290			WP_000205474.1	WP_000205474.1
Acinetobacter_baumannii_NIPH_329			WP_000205472.1	WP_000205472.1
Acinetobacter_baumannii_NIPH_335			WP_000205470.1	WP_000205470.1
Acinetobacter_baumannii_NIPH_410			WP_016653772.1	WP_016653772.1
Acinetobacter_baumannii_NIPH_527			WP_000205474.1	WP_000205474.1
Acinetobacter_baumannii_NIPH_528			WP_000205472.1	WP_000205472.1
Acinetobacter_baumannii_NIPH_60			WP_004840577.1	WP_004840577.1
Acinetobacter_baumannii_NIPH_601			WP_000205474.1	WP_000205474.1
Acinetobacter_baumannii_NIPH_615			WP_000205472.1	WP_000205472.1
Acinetobacter_baumannii_NIPH_67			WP_000205472.1	WP_000205472.1
Acinetobacter_baumannii_NIPH_70			WP_000205474.1	WP_000205474.1
Acinetobacter_baumannii_NIPH_80			WP_000205472.1	WP_000205472.1
Acinetobacter_baumannii_OIFC0162			(WP_000179585.1 or WP_000205472.1)	(WP_000179585.1 or WP_000205472.1)
Acinetobacter_baumannii_OIFC032			WP_000205472.1	WP_000205472.1
Acinetobacter_baumannii_OIFC035			WP_002132216.1	WP_002132216.1
Acinetobacter_baumannii_OIFC047			WP_000205472.1	WP_000205472.1
Acinetobacter_baumannii_OIFC065			WP_000205472.1	WP_000205472.1
Acinetobacter_baumannii_OIFC074			WP_000205474.1	WP_000205474.1
Acinetobacter_baumannii_OIFC087			WP_000205472.1	WP_000205472.1
Acinetobacter_baumannii_OIFC098			WP_000205470.1	WP_000205470.1
Acinetobacter_baumannii_OIFC099			WP_000205472.1	WP_000205472.1
Acinetobacter_baumannii_OIFC109			WP_000205474.1	WP_000205474.1
Acinetobacter_baumannii_OIFC110			WP_000205474.1	WP_000205474.1
Acinetobacter_baumannii_OIFC111			WP_000205472.1	WP_000205472.1
Acinetobacter_baumannii_OIFC137			WP_000205474.1	WP_000205474.1
Acinetobacter_baumannii_OIFC143			WP_000205472.1	WP_000205472.1
Acinetobacter_baumannii_OIFC180			WP_000205472.1	WP_000205472.1
Acinetobacter_baumannii_OIFC189			WP_000205472.1	WP_000205472.1
Acinetobacter_baumannii_OIFC338			WP_000205472.1	WP_000205472.1
Acinetobacter_baumannii_TYTH_1			WP_000205472.1	WP_000205472.1
Acinetobacter_baumannii_UMB001			WP_000205472.1	WP_000205472.1
Acinetobacter_baumannii_W7282			WP_000205472.1	WP_000205472.1
Acinetobacter_baumannii_WC_348			(WP_000205472.1 or WP_000179585.1)	(WP_000205472.1 or WP_000179585.1)
Acinetobacter_baumannii_WC_692			WP_000205474.1	WP_000205474.1
Acinetobacter_baumannii_WC_A_694			WP_000205474.1	WP_000205474.1
Acinetobacter_baumannii_WC_A_92			WP_000205472.1	WP_000205472.1
Acinetobacter_baumannii_WM99c			WP_000205472.1	WP_000205472.1
Acinetobacter_baumannii_ZWS1122			WP_000205472.1	WP_000205472.1
Acinetobacter_baumannii_ZWS1219			WP_000205472.1	WP_000205472.1
Acinetobacter_calcoaceticus_ANC_3680	WP_005040212.1 or WP_005040144.1		WP_005039137.1	WP_005039137.1
Acinetobacter_calcoaceticus_ANC_3811	WP_016137962.1 or WP_016137991.1		WP_035366025.1	WP_035366025.1
Acinetobacter_calcoaceticus_DSM_30006_CIP_81_8			WP_005046039.1	WP_005046039.1
Acinetobacter_calcoaceticus_NIPH_13	WP_004643021.1 or WP_004642983.1		WP_004643522.1	WP_004643522.1
Acinetobacter_calcoaceticus_PHEA_2			YP_004996107.1
Acinetobacter_calcoaceticus_RUH2202	WP_003652030.1 or WP_035357682.1		WP_003650576.1	WP_003650576.1
Acinetobacter_calcoaceticus_TG19585	WP_017388268.1 or WP_017388290.1		WP_017387948.1	WP_017387948.1
Acinetobacter_calcoaceticus_TG19588	WP_005046799.1 or WP_005046739.1		WP_005046039.1	WP_005046039.1
Acinetobacter_calcoaceticus_TG19593	WP_017391444.1 or WP_017391413.1		WP_017391934.1	WP_017391934.1
Acinetobacter_guillouiae_CIP_63_46			WP_004721940.1	WP_004721940.1
Acinetobacter_guillouiae_KCTC_23200			WP_004721940.1	WP_004721940.1
Acinetobacter_guillouiae_MSP4_18			WP_004721940.1	WP_004721940.1
Acinetobacter_guillouiae_NIPH_991			WP_004820098.1	WP_004820098.1
Acinetobacter_haemolyticus_ATCC_19194			WP_004638462.1	WP_004638462.1
Acinetobacter_haemolyticus_CIP_64_3	WP_005082517.1		WP_004638462.1	WP_004638462.1
Acinetobacter_haemolyticus_NIPH_261			WP_005091016.1
Acinetobacter_haemolyticus_TG19599	WP_005082517.1		WP_004638462.1	WP_004638462.1
Acinetobacter_haemolyticus_TG21157	WP_008941377.1		WP_005091016.1	WP_005091016.1
Acinetobacter_johnsonii_ANC_3681	WP_035326919.1 or WP_004979751.1		WP_004982606.1	WP_004982606.1
Acinetobacter_johnsonii_CIP_64_6	WP_004693205.1 or WP_035325275.1		WP_004695707.1	WP_004695707.1
Acinetobacter_johnsonii_SH046			WP_005400483.1
Acinetobacter_junii_CIP_107470	WP_004911203.1		WP_004912330.1	WP_004912330.1
Acinetobacter_junii_CIP_64_5	WP_004961972.1		WP_004963022.1	WP_004963022.1
Acinetobacter_junii_NIPH_182	WP_004954294.1 or WP_004953492.1		WP_004955200.1	WP_004955200.1
Acinetobacter_junii_SH205			WP_004963022.1
Acinetobacter_lwoffii_CIP_70_31	WP_005100204.1		WP_004279645.1	WP_004279645.1
Acinetobacter_lwoffii_NCTC_5866	WP_004647048.1		WP_004646481.1	WP_004646481.1
Acinetobacter_lwoffii_NIPH_478	WP_005106865.1		WP_005107417.1	WP_005107417.1
Acinetobacter_lwoffii_NIPH_715	WP_004731116.1		WP_004279645.1	WP_004279645.1
Acinetobacter_lwoffii_SH145			WP_004279645.1	WP_004279645.1
Acinetobacter_lwoffii_TG19636	WP_005266322.1		WP_004279645.1	WP_004279645.1
Acinetobacter_lwoffii_WJ10621			WP_010327239.1
Acinetobacter_nosocomialis_NIPH_2119			WP_004707723.1	WP_004707723.1
Acinetobacter_pittii_ANC_3678	WP_002120942.1 or WP_005069067.1		WP_002119072.1	WP_002119072.1
Acinetobacter_pittii_ANC_4050	WP_016140846.1 or WP_016140812.1		WP_016140436.1	WP_016140436.1
Acinetobacter_pittii_ANC_4052			WP_016145945.1
Acinetobacter_pittii_AP_882			WP_017386559.1	WP_017386559.1
Acinetobacter_pittii_CIP_70_29	WP_005074013.1 or WP_005074168.1		WP_002119072.1	WP_002119072.1
Acinetobacter_pittii_D499	WP_019767736.1 or WP_019767714.1		WP_002119072.1	WP_002119072.1
Acinetobacter_pittii_IEC338SC			WP_017480718.1	WP_017480718.1
Acinetobacter_pittii_TG6411	WP_017399608.1 or WP_017399582.1		WP_002119072.1	WP_002119072.1
Acinetobacter_radioresistens_DSM_6976	WP_005026189.1		WP_005025222.1	WP_005025222.1
Acinetobacter_radioresistens_NIPH_2130			WP_005015117.1
Acinetobacter_radioresistens_SH164	WP_005020031.1		WP_005015117.1	WP_005015117.1
Acinetobacter_radioresistens_SK82	WP_005020031.1		WP_005015117.1	WP_005015117.1
Acinetobacter_radioresistens_TG02010	WP_005026189.1		WP_005025222.1	WP_005025222.1
Acinetobacter_radioresistens_WC_A_157	WP_005406165.1 or WP_005406248.1		WP_005025222.1	WP_005025222.1
Acinetobacter_sp_ATCC_27244			WP_005091016.1	WP_005091016.1
Acinetobacter_sp_OIFC021			WP_002052447.1	WP_002052447.1
Acinetobacter_sp_RUH2624			WP_004886128.1	WP_004886128.1
Acinetobacter_sp_SH024			WP_002119072.1	WP_002119072.1
Acinetobacter_sp_WC_141			(WP_009389888.1 or WP_000179585.1)	(WP_000179585.1 or WP_009389888.1)
Acinetobacter_sp_WC_323			WP_009511138.1	WP_009511138.1
Actinobacillus_pleuropneumoniae_L20			WP_005601109.1
Actinobacillus_pleuropneumoniae_S8			WP_005601109.1	WP_005601109.1	B838_RS0110645 or WP_005613005.1
Actinobacillus_pleuropneumoniae_serovar_10_str_D13039			WP_005601109.1	WP_005601109.1	WP_005613005.1 or APPSER10_RS07495
Actinobacillus_pleuropneumoniae_serovar_11_str_56153			WP_005597285.1	WP_005597285.1	WP_005598683.1 or APPSER11_RS07845
Actinobacillus_pleuropneumoniae_serovar_12_str_1096			WP_005601109.1	WP_005601109.1	WP_005615825.1 or APPSER12_RS07425
Actinobacillus_pleuropneumoniae_serovar_13_str_N273			WP_005601109.1	WP_005601109.1	APPSER13_RS07655 or WP_005613005.1
Actinobacillus_pleuropneumoniae_serovar_1_str_4074			WP_005597285.1	WP_005597285.1	WP_005598683.1 or APPSER1_RS07765
Actinobacillus_pleuropneumoniae_serovar_2_str_4226			WP_005601109.1	WP_005601109.1	APP2_RS04080 or WP_005602099.1
Actinobacillus_pleuropneumoniae_serovar_2_str_S1536			WP_005601109.1	WP_005601109.1	WP_005602099.1 or APPSER2_RS07195
Actinobacillus_pleuropneumoniae_serovar_3_str_JL03			WP_012262975.1	WP_012262975.1	WP_012263244.1 or APJL_RS07420
Actinobacillus_pleuropneumoniae_serovar_4_str_M62			WP_005604449.1	WP_005604449.1	APPSER4_RS07325 or WP_005605341.1
Actinobacillus_pleuropneumoniae_serovar_6_str_Femo			WP_005601109.1	WP_005601109.1	APP6_RS07735 or WP_005620580.1
Actinobacillus_pleuropneumoniae_serovar_7_str_AP76			WP_005601109.1	WP_005601109.1	APP7_RS07570 or WP_005613005.1
Actinobacillus_pleuropneumoniae_serovar_9_str_CVJ13261			WP_005597285.1	WP_005597285.1	APPSER9_RS07785 or WP_005598683.1
Actinomyces_bowdenii_OH5050			gap_fill						WP_124934545.1
Actinomyces_cardiffensis_F0333			gap_fill						WP_005963728.1
Actinomyces_europaeus_ACS_120_V_Col10b			gap_fill						WP_016443608.1
Actinomyces_europaeus_UMB0652_ERR1203664_17957_1_76_1			gap_fill						WP_102217664.1
Actinomyces_georgiae_DSM_6843			gap_fill						WP_051226245.1
Actinomyces_gerencseriae_DSM_6844			gap_fill						WP_026407038.1
Actinomyces_graevenitzii_C83									WP_155813138.1
Actinomyces_hongkongensis_HKU8			gap_fill						WP_009399726.1
Actinomyces_ihuae_DSM_100538			gap_fill						gap_fill
Actinomyces_israelii_DSM_43320			gap_fill						WP_043562151.1
Actinomyces_johnsonii_F0510			gap_fill						WP_039892739.1
Actinomyces_johnsonii_F0542			gap_fill						WP_034472992.1
Actinomyces_massiliensis_4401292			gap_fill						WP_154650323.1
Actinomyces_massiliensis_F0489			gap_fill						WP_198430159.1
Actinomyces_meyeri_DSM_20733			gap_fill						WP_074632574.1
Actinomyces_naeslundii_str_Howell_279			gap_fill						WP_003784889.1
Actinomyces_odontolyticus_ATCC_17982									WP_003792435.1
Actinomyces_odontolyticus_F0309			gap_fill		WP_004565552.1 or HMPREF0970_RS06735				WP_003796663.1
Actinomyces_oris_K20									WP_010615177.1
Actinomyces_oris_T14V			gap_fill						WP_060957935.1
Actinomyces_polynesiensis_DSM_27066			gap_fill						WP_043535097.1
Actinomyces_sp_HPA0247			gap_fill						WP_016461687.1
Actinomyces_sp_ICM39			gap_fill						WP_007589221.1
Actinomyces_sp_ICM47			gap_fill						WP_009648972.1
Actinomyces_sp_ph3			gap_fill						WP_019126013.1
Actinomyces_timonensis_DSM_23838			gap_fill						WP_017178567.1
Actinomyces_turicensis_ACS_279_V_Col4									WP_006681034.1
Actinomyces_urogenitalis_DSM_15434									WP_006549697.1
Actinomyces_urogenitalis_S6_C4			gap_fill						WP_034235313.1
Actinomyces_viscosus_C505			gap_fill						WP_004564935.1
Acutalibacter_muris_KB18			gap_fill
Adlercreutzia_equolifaciens_DSM_19450			gap_fill
Advenella_mimigardefordensis_DPN7			WP_025371364.1	WP_025371364.1		WP_025373059.1
Aerococcus_christensenii_CCUG28831			gap_fill
Aerococcus_viridans_LL1		gap_fill	gap_fill
Aeromicrobium_massiliense_JC14			gap_fill						WP_019145868.1
Aeromonas_caviae_Ae398			WP_010672442.1
Aeromonas_caviae_FDAARGOS_72			WP_042864636.1	WP_042864636.1
Aeromonas_caviae_FDAARGOS_75			WP_010672442.1	WP_010672442.1
Aeromonas_hydrophila_116			WP_017766516.1	WP_017766516.1
Aeromonas_hydrophila_14		gap_fill	WP_017766516.1	WP_017766516.1	gap_fill
Aeromonas_hydrophila_187		gap_fill	WP_017783657.1	WP_017783657.1	gap_fill
Aeromonas_hydrophila_259		gap_fill	WP_005307559.1	WP_005307559.1	gap_fill
Aeromonas_hydrophila_AH10			WP_080938302.1	WP_080938302.1
Aeromonas_hydrophila_ML09_119		AHML_RS00635 or WP_016348968.1	WP_011704199.1	WP_011704199.1	gap_fill
Aeromonas_hydrophila_RB_AH			WP_011704199.1	WP_011704199.1
Aeromonas_hydrophila_SNUFPC_A8		gap_fill	WP_011704199.1	WP_011704199.1	gap_fill
Aeromonas_hydrophila_subsp_hydrophila_ATCC_7966			WP_011704199.1
Aeromonas_jandaei_Riv2			WP_041210786.1
Aeromonas_media_ARB13			WP_043132628.1	WP_043132628.1
Aeromonas_media_WS			WP_005331104.1
Aeromonas_veronii_AER39			WP_005339536.1	WP_005339536.1	gap_fill
Aeromonas_veronii_AER397		gap_fill	WP_005356031.1	WP_005356031.1	gap_fill
Aeromonas_veronii_AMC34		gap_fill	WP_005339536.1	WP_005339536.1	gap_fill
Aeromonas_veronii_AMC35		gap_fill	WP_005339536.1	WP_005339536.1	gap_fill
Aeromonas_veronii_AVNIH1			WP_005339536.1	WP_005339536.1
Aeromonas_veronii_B565			WP_005356031.1
Aeromonas_veronii_TH0426			WP_005339536.1	WP_005339536.1
Afipia_birgiae_34632			WP_040425845.1
Aggregatibacter_aphrophilus_ATCC_33389			WP_197718137.1	WP_197718137.1	ATCC33389_RS07000 or WP_032995277.1
Aggregatibacter_aphrophilus_F0387			gap_fill	gap_fill	HMPREF9335_RS05360 or WP_005701476.1
Aggregatibacter_aphrophilus_NJ8700			gap_fill
Aggregatibacter_aphrophilus_W10433			WP_183144850.1	WP_183144850.1
Aggregatibacter_segnis_933_AAPH_107_59761_2565235			gap_fill
Aggregatibacter_segnis_ATCC_33393			gap_fill
Agrobacterium_fabrum_str_C58			WP_010971040.1	WP_010971040.1
Agrobacterium_tumefaciens_CCNWGS0286			WP_035212553.1	WP_035212553.1
Agrobacterium_tumefaciens_F2			WP_003494007.1
Agrobacterium_tumefaciens_str_Cherry_2E_2_2			WP_035236064.1	WP_035236064.1
Akkermansia_muciniphila_YL44			gap_fill
Akkermansia_sp_KLE1797			gap_fill
Akkermansia_sp_KLE1798			gap_fill
Alcaligenes_faecalis_NBIB_017			WP_009457445.1	WP_009457445.1		WP_021447253.1
Alcaligenes_faecalis_subsp_faecalis_NBRC_13111			WP_042486074.1			WP_042485651.1
Alcaligenes_faecalis_subsp_faecalis_NCIB_8687			WP_039944086.1			WP_003805677.1
Alcaligenes_faecalis_ZD02			WP_045929775.1	WP_045929775.1		WP_045929451.1
Aliivibrio_fischeri_ES114			WP_011262811.1	WP_011262811.1
Aliivibrio_fischeri_MJ11			WP_012534388.1	WP_012534388.1
Aliivibrio_salmonicida_LFI1238			WP_012551313.1	WP_012551313.1
Alistipes_ihumii_AP11			gap_fill
Alistipes_obesi_isolate_ph8			gap_fill
Alistipes_onderdonkii_DSM_19147			gap_fill
Alistipes_provencensis_DSM_102308			gap_fill
Alistipes_putredinis_DSM_17216			gap_fill
Alistipes_senegalensis_JC50			gap_fill
Alistipes_sp_AL_1			gap_fill
Alistipes_sp_HGB5			gap_fill
Alistipes_timonensis_JC136			gap_fill
Allobaculum_stercoricanis_DSM_13633			gap_fill
Alloiococcus_otitis_ATCC_51267			gap_fill
Alloprevotella_rava_F0323			gap_fill
Alloscardovia_omnicolens_1036_GVAG_103_587_17548_30_31			gap_fill						WP_021618232.1
Alloscardovia_omnicolens_DSM_21503			gap_fill						WP_022856311.1
Alloscardovia_omnicolens_F0580			gap_fill						WP_021618232.1
Amazonia_massiliensis_MS4			gap_fill
Aminivibrio_pyruvatiphilus_DSM_25964			gap_fill
Anaerobacillus_macyae_DSM_16346			gap_fill			WP_048309466.1
Anaerococcus_hydrogenalis_ACS_025_V_Sch4		gap_fill	gap_fill
Anaerococcus_jeddahensis_DSM_100537			gap_fill
Anaerococcus_lactolyticus_ATCC_51172			gap_fill
Anaerococcus_lactolyticus_S7_1_13			gap_fill
Anaerococcus_obesiensis_ph10			gap_fill
Anaerococcus_prevotii_ACS_065_V_Col13		gap_fill	gap_fill
Anaerococcus_rubeinfantis_DSM_101186			gap_fill
Anaerococcus_senegalensis_JC48			gap_fill
Anaerococcus_tetradius_ATCC_35098			gap_fill
Anaerococcus_tetradius_MJR8151			gap_fill
Anaerofustis_stercorihominis_DSM_17244									gap_fill
Anaeroplasma_bactoclasticum_ATCC_27112			gap_fill
Anaerosalibacter_massiliensis_ND1			gap_fill
Anaerosporobacter_mobilis_DSM_15930			gap_fill
Anaerostipes_hadrus_DSM_3319			gap_fill
Anaerotignum_lactatifermentans_DSM_14214			gap_fill						WP_072850113.1
Anaerotignum_propionicum_DSM_1682			gap_fill						WP_066048942.1
Anaerotruncus_colihominis_DSM_17241									WP_040343455.1
Anaerotruncus_sp_G3_2012			gap_fill						WP_016314898.1
Anaerovorax_odorimutans_DSM_5092			gap_fill
Aneurinibacillus_aneurinilyticus_ATCC_12856			gap_fill
Arcobacter_butzleri_7h1h			gap_fill
Arcobacter_butzleri_ED_1			gap_fill
Arcobacter_butzleri_JV22			gap_fill
Arcobacter_butzleri_RM4018			gap_fill
Ardenticatena_maritima_110S			gap_fill						WP_054492209.1
Arthrobacter_castelli_DSM_16402			gap_fill						WP_026819678.1
Atopobium_minutum_10063974									WP_002563753.1
Atopobium_vaginae_CMW7778A									WP_061102722.1
Atopobium_vaginae_DSM_15829									WP_006303020.1
Atopobium_vaginae_PB189_T1_4									WP_006303937.1
Auritidibacter_ignavus_IMMIB_L_1656			gap_fill						WP_110100588.1
Bacillus_altitudinis_41KF2b			gap_fill
Bacillus_amyloliquefaciens_DSM7			gap_fill
Bacillus_amyloliquefaciens_FZB42			gap_fill
Bacillus_amyloliquefaciens_LL3			gap_fill
Bacillus_amyloliquefaciens_subsp_amyloliquefaciens_DC_12			gap_fill
Bacillus_amyloliquefaciens_TA208			gap_fill
Bacillus_amyloliquefaciens_XH7			gap_fill
Bacillus_amyloliquefaciens_Y2			gap_fill
Bacillus_andreraoultii_KW_12			gap_fill
Bacillus_atrophaeus_1013_1		gap_fill	gap_fill		gap_fill
Bacillus_atrophaeus_1013_2		gap_fill	gap_fill		gap_fill
Bacillus_atrophaeus_1942		gap_fill	gap_fill		gap_fill
Bacillus_atrophaeus_ATCC_49822_1			gap_fill
Bacillus_atrophaeus_ATCC_49822_2		gap_fill	gap_fill		gap_fill
Bacillus_atrophaeus_ATCC_9372_1		gap_fill	gap_fill		gap_fill
Bacillus_atrophaeus_ATCC_9372_2		gap_fill	gap_fill		gap_fill
Bacillus_atrophaeus_BACI051_E		gap_fill	gap_fill		gap_fill
Bacillus_atrophaeus_BACI051_N		gap_fill	gap_fill		gap_fill
Bacillus_atrophaeus_C89		gap_fill	gap_fill		gap_fill
Bacillus_atrophaeus_Detrick_1		gap_fill	gap_fill		gap_fill
Bacillus_atrophaeus_Detrick_2		gap_fill	gap_fill		gap_fill
Bacillus_atrophaeus_Detrick_3		gap_fill	gap_fill		gap_fill
Bacillus_atrophaeus_DJHJ8			gap_fill
Bacillus_atrophaeus_str_Dugway		gap_fill	gap_fill		gap_fill
Bacillus_atrophaeus_UCMB_5137		gap_fill	gap_fill		gap_fill
Bacillus_cereus_03BB102	WP_000594861.1		gap_fill		WP_000536377.1 or AS54_RS25565 or AS54_RS16890	WP_000661967.1
Bacillus_cereus_03BB108	WP_000594861.1		gap_fill		AK40_RS12605 or AK40_RS21305 or WP_000536377.1	WP_000661967.1
Bacillus_cereus_172560W	WP_000594881.1		gap_fill		WP_000536369.1 or BCERE0005_RS14655 or BCERE0005_RS23005	WP_000661953.1
Bacillus_cereus_95	WP_000594863.1		gap_fill		BCERE0016_RS15530 or WP_000536374.1 or BCERE0016_RS24095	WP_000661968.1
Bacillus_cereus_AH1134	WP_000594888.1		gap_fill		BCAH1134_RS08840 or WP_000536385.1 or BCAH1134_RS12525	WP_000661974.1
Bacillus_cereus_AH1271			gap_fill		BCERE0028_RS14550 or BCERE0028_RS22515 or WP_000536381.1	WP_000661950.1
Bacillus_cereus_AH1272	WP_000594865.1		gap_fill		BCERE0029_RS27930 or BCERE0029_RS22525 or WP_000536362.1	WP_000661975.1
Bacillus_cereus_AH1273			gap_fill			WP_000661975.1
Bacillus_cereus_AH187_F4810_72			gap_fill			WP_000661936.1
Bacillus_cereus_AH676	WP_000594877.1		gap_fill		BCERE0027_RS14465 or BCERE0027_RS22945 or WP_000526090.1	WP_000661955.1
Bacillus_cereus_AH820	WP_000594850.1		gap_fill		BCAH820_RS24740 or WP_000536374.1 or BCAH820_RS15925	WP_000661968.1
Bacillus_cereus_AND1407	WP_000594873.1		gap_fill		WP_000536372.1 or IC5_RS10360 or IC5_RS11230	WP_000661936.1
Bacillus_cereus_ATCC_10876	WP_000594870.1		gap_fill		DJ50_RS14980 or DJ50_RS03550 or WP_000536354.1	WP_033682841.1
Bacillus_cereus_ATCC_10987	WP_000594860.1		gap_fill		WP_000536373.1 or BCE_RS23955 or BCE_RS15365	WP_000661937.1
Bacillus_cereus_ATCC_14579	gap_fill		gap_fill		gap_fill	WP_000661957.1
Bacillus_cereus_ATCC_4342	WP_000594874.1		gap_fill		BF35_RS16680 or BF35_RS25325 or WP_000536378.1	WP_000661967.1
Bacillus_cereus_B4264	WP_000594878.1		gap_fill		BCB4264_RS24580 or WP_000536370.1 or BCB4264_RS15660	WP_000661942.1
Bacillus_cereus_B5_2	WP_016087077.1		gap_fill		KQ3_RS14090 or KQ3_RS23215 or WP_016087258.1	WP_016087599.1
Bacillus_cereus_BAG1O_1	WP_000594865.1		gap_fill		IC7_RS09495 or IC7_RS27830 or WP_000536390.1	WP_000661976.1
Bacillus_cereus_BAG1O_3	WP_000594880.1		gap_fill		ICA_RS08575 or ICA_RS00165 or WP_000536369.1	WP_000661957.1
Bacillus_cereus_BAG1X1_1	WP_016080941.1		gap_fill		WP_016081044.1 or ICC_RS03360 or ICC_RS12060	WP_016081331.1
Bacillus_cereus_BAG1X1_2	WP_000594880.1		gap_fill		ICE_RS12100 or ICE_RS20390 or WP_000536369.1	WP_000661957.1
Bacillus_cereus_BAG1X1_3	WP_000594865.1		gap_fill		ICG_RS12245 or ICG_RS03510 or WP_000536390.1	WP_000661977.1
Bacillus_cereus_BAG1X2_1	WP_016080941.1		gap_fill		WP_016081044.1 or ICI_RS23365 or ICI_RS14640	WP_016081331.1
Bacillus_cereus_BAG1X2_2	WP_016080941.1		gap_fill		ICK_RS12055 or ICK_RS03130 or WP_016081044.1	WP_016081331.1
Bacillus_cereus_BAG1X2_3	WP_016080941.1		gap_fill		ICM_RS21120 or WP_016081044.1 or ICM_RS12405	WP_016081331.1
Bacillus_cereus_BAG2O_1	WP_016080941.1		gap_fill		ICO_RS14730 or WP_016081044.1 or ICO_RS23420	WP_016081331.1
Bacillus_cereus_BAG2O_2	WP_000594891.1		gap_fill		WP_000536356.1 or ICQ_RS23100 or ICQ_RS14630	WP_000661949.1
Bacillus_cereus_BAG2O_3	WP_016087077.1		gap_fill		ICS_RS12645 or WP_016087258.1 or ICS_RS03350	WP_016087599.1
Bacillus_cereus_BAG2X1_1	WP_000594889.1		gap_fill		WP_000526201.1 or ICU_RS02950 or ICU_RS10430	WP_000661960.1
Bacillus_cereus_BAG2X1_3	WP_000594889.1		gap_fill		ICY_RS09840 or ICY_RS02210 or WP_000526201.1	WP_000661960.1
Bacillus_cereus_BAG3O_1	WP_016087077.1		gap_fill		WP_016134864.1 or KQ1_RS24385 or KQ1_RS15230	WP_000661967.1
Bacillus_cereus_BAG3O_2	WP_000594845.1		gap_fill		WP_000536369.1 or IE1_RS03460 or IE1_RS12060	WP_000661961.1
Bacillus_cereus_BAG3X2_1	WP_000594866.1		gap_fill		IE3_RS11845 or IE3_RS03520 or WP_000526093.1	WP_000661976.1
Bacillus_cereus_BAG3X2_2	WP_000594883.1		gap_fill		IE5_RS23965 or WP_000536384.1 or IE5_RS15275	WP_000661957.1
Bacillus_cereus_BAG4O_1	WP_000594845.1		gap_fill		IE7_RS23820 or WP_000536369.1 or IE7_RS15230	WP_000661961.1
Bacillus_cereus_BAG4X12_1	WP_000594878.1		gap_fill		WP_000536385.1 or IE9_RS14705 or IE9_RS22950	WP_000661957.1
Bacillus_cereus_BAG4X2_1	WP_000594846.1		gap_fill		IEA_RS12205 or IEA_RS03770 or WP_000536357.1	WP_000661949.1
Bacillus_cereus_BAG5O_1	WP_000594846.1		gap_fill		IEC_RS11405 or WP_000536357.1 or IEC_RS20180	WP_000661948.1
Bacillus_cereus_BAG5X12_1	WP_000594878.1		gap_fill		IEG_RS08775 or IEG_RS00540 or WP_000536385.1	WP_000661957.1
Bacillus_cereus_BAG5X1_1	WP_002199903.1		gap_fill		gap_fill	WP_002110249.1
Bacillus_cereus_BAG6O_1	WP_000594846.1		gap_fill		IEK_RS03400 or WP_000536357.1 or IEK_RS11830	WP_000661949.1
Bacillus_cereus_BAG6O_2	WP_002110842.1		gap_fill		gap_fill	WP_002110249.1
Bacillus_cereus_BAG6X1_2	WP_002120695.1		gap_fill		WP_002120494.1 or IEQ_RS13240 or IEQ_RS21290	WP_033711859.1
Bacillus_cereus_BDRD_Cer4	WP_000594876.1		gap_fill		gap_fill	WP_000661957.1
Bacillus_cereus_BDRD_ST196	WP_002128164.1		gap_fill		WP_002033193.1 or BCERE0014_RS22515 or BCERE0014_RS14825	WP_002127699.1
Bacillus_cereus_BDRD_ST24	WP_000594879.1		gap_fill		BCERE0012_RS14905 or BCERE0012_RS23065 or WP_000526091.1	WP_000661957.1
Bacillus_cereus_BDRD_ST26	WP_000594873.1		gap_fill		WP_000536372.1 or BCERE0013_RS23510 or BCERE0013_RS14655	WP_000661936.1
Bacillus_cereus_BGSC_6E1	WP_000594861.1		gap_fill		BCERE0004_RS23835 or WP_000536377.1 or BCERE0004_RS15125	WP_000661967.1
Bacillus_cereus_biovar_anthracis_str_CI	WP_000594857.1		gap_fill		gap_fill
Bacillus_cereus_BMG1_7	WP_000594883.1		gap_fill		WP_000536384.1 or IES_RS01855 or IES_RS23340	WP_000661957.1
Bacillus_cereus_E33L	WP_000594852.1		gap_fill		WP_000536366.1 or BF28_RS15500 or BF28_RS06530	WP_000661952.1
Bacillus_cereus_F	WP_016718050.1		gap_fill		MW1_RS24365 or MW1_RS15175 or WP_016717924.1	WP_016717657.1
Bacillus_cereus_F65185	WP_000594883.1		gap_fill		WP_000536355.1 or BCERE0025_RS26925 or BCERE0025_RS23135	WP_000661957.1
Bacillus_cereus_F837	WP_000594861.1		gap_fill		BCF_RS15250 or WP_000536377.1 or BCF_RS23970	WP_000661967.1
Bacillus_cereus_FORC_005			gap_fill			WP_000661957.1
Bacillus_cereus_FRI_35	WP_000594859.1		gap_fill		BCK_RS19845 or WP_000536382.1 or BCK_RS11490	WP_000661934.1
Bacillus_cereus_G9241	WP_001968837.1		gap_fill		WP_001968577.1 or AQ16_RS24945 or AQ16_RS16110	WP_002194778.1
Bacillus_cereus_G9842			gap_fill			WP_000661940.1
Bacillus_cereus_HD73	WP_000594883.1		gap_fill		WP_000536384.1 or IG1_RS00205 or IG1_RS18800	WP_000661957.1
Bacillus_cereus_HuA2_1	WP_002137262.1		gap_fill		gap_fill	WP_000661975.1
Bacillus_cereus_HuA2_3	WP_016091212.1		gap_fill		IG5_RS28395 or WP_000536357.1 or IG5_RS19705	WP_000661948.1
Bacillus_cereus_HuA2_4	WP_002128164.1		gap_fill		IG7_RS22965 or IG7_RS14615 or WP_002142391.1	WP_000661975.1
Bacillus_cereus_HuA2_9	WP_016091775.1		gap_fill		gap_fill	WP_016091502.1
Bacillus_cereus_HuA3_9	WP_016095827.1		gap_fill		IGA_RS15335 or WP_002066251.1 or IGA_RS16435	WP_016095556.1
Bacillus_cereus_HuA4_10	WP_002146693.1		gap_fill		IGC_RS11885 or IGC_RS03310 or WP_002146824.1	WP_002147441.1
Bacillus_cereus_HuB13_1	WP_000594883.1		gap_fill		WP_000536384.1 or IGG_RS27915 or IGG_RS20555	WP_000661957.1
Bacillus_cereus_HuB1_1	WP_000594880.1		gap_fill		IGE_RS04380 or WP_000536367.1 or IGE_RS12585	WP_000661958.1
Bacillus_cereus_HuB2_9	WP_000594846.1		gap_fill		IGI_RS11805 or IGI_RS03370 or WP_000536357.1	WP_000661949.1
Bacillus_cereus_HuB4_4	WP_000594872.1		gap_fill		WP_000536383.1 or IGM_RS26430 or IGM_RS17545	WP_000661959.1
Bacillus_cereus_HuB5_5	WP_000594891.1		gap_fill		IGO_RS22995 or IGO_RS14520 or WP_000536356.1	WP_000661949.1
Bacillus_cereus_IS075	WP_000594873.1		gap_fill		IAU_RS01145 or WP_000536372.1 or IAU_RS16685	WP_000661936.1
Bacillus_cereus_IS195	WP_000594873.1		gap_fill		IGQ_RS04650 or WP_000536372.1 or IGQ_RS15610	WP_000661936.1
Bacillus_cereus_IS845_00	WP_000594873.1		gap_fill		IGS_RS16900 or IGS_RS04635 or WP_000536372.1	WP_000661936.1
Bacillus_cereus_ISP2954	WP_000594883.1		gap_fill		IGU_RS26305 or IGU_RS18695 or WP_000536384.1	WP_000661957.1
Bacillus_cereus_ISP3191	WP_000594857.1		gap_fill		IGW_RS00120 or IGW_RS08845 or WP_000536388.1	WP_000661967.1
Bacillus_cereus_K_5975c	WP_016077458.1		gap_fill		WP_016077495.1 or IGY_RS03455 or IGY_RS12140	WP_000661959.1
Bacillus_cereus_LCT_BC244	WP_000594896.1		gap_fill		UWI_RS0100600 or WP_000536359.1 or UWI_RS0109205	WP_000661970.1
Bacillus_cereus_m1293	WP_000594896.1		gap_fill		BCERE0001_RS23300 or WP_000536360.1 or BCERE0001_RS14690	WP_000661965.1
Bacillus_cereus_m1550	WP_000594844.1		gap_fill		BCERE0011_RS15905 or BCERE0011_RS23475 or WP_000536385.1	WP_000661957.1
Bacillus_cereus_MC118	WP_002161144.1		gap_fill		gap_fill	WP_002110249.1
Bacillus_cereus_MC67	WP_002161144.1		gap_fill		gap_fill	WP_002110249.1
Bacillus_cereus_MSX_A1	WP_000594885.1		gap_fill		II5_RS09205 or WP_000536383.1 or II5_RS00200	WP_000661939.1
Bacillus_cereus_MSX_A12	WP_000594873.1		gap_fill		WP_000536372.1 or II7_RS05835 or II7_RS21790	WP_000661936.1
Bacillus_cereus_MSX_D12	WP_000594896.1		gap_fill		II9_RS03545 or WP_000536360.1 or II9_RS12630	WP_000661965.1
Bacillus_cereus_NC7401	WP_000594873.1		gap_fill		WP_000536372.1 or BCN_RS15240 or BCN_RS24025	WP_000661936.1
Bacillus_cereus_Q1	WP_000594873.1		gap_fill		BCQ_RS23685 or WP_000536372.1 or BCQ_RS15055	WP_000661965.1
Bacillus_cereus_Rock1_15	WP_000594877.1		gap_fill		WP_000526090.1 or BCERE0018_RS14670 or BCERE0018_RS23325	WP_000661957.1
Bacillus_cereus_Rock1_3	WP_000594891.1		gap_fill		BCERE0017_RS14645 or WP_000536356.1 or BCERE0017_RS23010	WP_000661949.1
Bacillus_cereus_Rock3_28			gap_fill			WP_000661948.1
Bacillus_cereus_Rock3_29	WP_000594846.1		gap_fill		BCERE0020_RS22435 or WP_000536357.1 or BCERE0020_RS14520	WP_000661949.1
Bacillus_cereus_Rock3_42	WP_000594858.1		gap_fill		WP_000536363.1 or BCERE0021_RS15275 or BCERE0021_RS23790	WP_000661967.1
Bacillus_cereus_Rock3_44			gap_fill			WP_000661943.1
Bacillus_cereus_Rock4_18	WP_000594848.1		gap_fill		BCERE0024_RS14515 or WP_000536358.1 or BCERE0024_RS22675	WP_000661947.1
Bacillus_cereus_Rock4_2	WP_000594883.1		gap_fill		WP_000536392.1 or BCERE0023_RS28495 or BCERE0023_RS23905	WP_000661957.1
Bacillus_cereus_str_Schrouff	WP_016077458.1		gap_fill		IAW_RS08880 or IAW_RS00195 or WP_016077495.1	WP_000661959.1
Bacillus_cereus_subsp_cytotoxis_NVH_391_98	WP_012094561.1		gap_fill		gap_fill	WP_012094382.1		gap_fill
Bacillus_cereus_TIAC219	WP_000594887.1		gap_fill		WP_000526088.1 or IAY_RS01485 or IAY_RS28345	WP_000661959.1
Bacillus_cereus_VD014	WP_000594871.1		gap_fill		IIA_RS14935 or IIA_RS23295 or WP_000526083.1	WP_000661972.1
Bacillus_cereus_VD021	WP_002128164.1		gap_fill		WP_002033193.1 or IIC_RS06490 or IIC_RS24815	WP_000661975.1
Bacillus_cereus_VD022	WP_000594887.1		gap_fill		IC1_RS00125 or WP_000526088.1 or IC1_RS09025	WP_000661959.1
Bacillus_cereus_VD045	WP_000594877.1		gap_fill		WP_000526090.1 or IIE_RS00225 or IIE_RS09330	WP_000661957.1
Bacillus_cereus_VD048	WP_002128164.1		gap_fill		IIG_RS09080 or IIG_RS00200 or WP_002066251.1	WP_002165669.1
Bacillus_cereus_VD102	WP_000594896.1		gap_fill		IIK_RS00270 or WP_000526087.1 or IIK_RS08995	WP_000661965.1
Bacillus_cereus_VD107	WP_002172647.1		gap_fill		gap_fill	WP_002172234.1
Bacillus_cereus_VD115	WP_000594893.1		gap_fill		gap_fill	WP_000661945.1
Bacillus_cereus_VD118	WP_016105449.1		gap_fill		gap_fill	WP_016105047.1
Bacillus_cereus_VD131	WP_016108805.1		gap_fill		IIS_RS30215 or WP_016108734.1 or IIS_RS21235	WP_000661948.1
Bacillus_cereus_VD133	WP_000594878.1		gap_fill		IIU_RS17565 or WP_004411745.1 or IIU_RS28835	WP_000661957.1
Bacillus_cereus_VD136			gap_fill			WP_016115061.1
Bacillus_cereus_VD140	WP_000594881.1		gap_fill		IIY_RS15735 or WP_016118229.1 or IIY_RS24505	WP_000661953.1
Bacillus_cereus_VD142	WP_002084537.1		gap_fill		WP_002084661.1 or IC3_RS17210 or IC3_RS16575	WP_000661975.1
Bacillus_cereus_VD146	WP_002128164.1		gap_fill		IK1_RS14905 or IK1_RS23495 or WP_016120472.1	WP_002127699.1
Bacillus_cereus_VD148	WP_000594891.1		gap_fill		IK3_RS03340 or IK3_RS11795 or WP_000536356.1	WP_000661946.1
Bacillus_cereus_VD154	WP_000594877.1		gap_fill		WP_000526090.1 or IK5_RS05600 or IK5_RS22400	WP_000661962.1
Bacillus_cereus_VD156	WP_000594872.1		gap_fill		IK7_RS03525 or IK7_RS12985 or WP_000526084.1	WP_000661973.1
Bacillus_cereus_VD166	WP_000594877.1		gap_fill		WP_000526090.1 or IK9_RS00195 or IK9_RS09150	WP_000661957.1
Bacillus_cereus_VD169	WP_000594877.1		gap_fill		IKA_RS14595 or WP_000526089.1 or IKA_RS23305	WP_000661957.1
Bacillus_cereus_VD184			gap_fill		IKC_RS25940 or IKC_RS15925 or WP_016122806.1	WP_016122637.1
Bacillus_cereus_VD196	WP_000594877.1		gap_fill		IKE_RS10705 or IKE_RS26795 or WP_016124826.1	WP_000661957.1
Bacillus_cereus_VD200	WP_000594877.1		gap_fill		IKG_RS24515 or IKG_RS15295 or WP_000526090.1	WP_000661963.1
Bacillus_cereus_VD214	WP_000594846.1		gap_fill		WP_000536357.1 or IKI_RS12830 or IKI_RS21580	WP_000661949.1
Bacillus_cereus_VDM006	WP_033671325.1		gap_fill		gap_fill	WP_016131470.1
Bacillus_cereus_VDM021	WP_033671325.1		gap_fill		gap_fill	WP_016132860.1
Bacillus_cereus_VDM034	WP_002190155.1		gap_fill		IKO_RS20450 or IKO_RS12280 or WP_002190079.1	WP_002127699.1
Bacillus_cereus_VDM053	WP_000594865.1		gap_fill		IKQ_RS16960 or IKQ_RS25585 or WP_016129866.1	WP_000661975.1
Bacillus_cereus_VDM062	WP_002190155.1		gap_fill		IKS_RS13275 or IKS_RS04720 or WP_002190079.1	WP_002127699.1
Bacillus_clausii_KSM_K16						WP_041823596.1
Bacillus_endophyticus_2102			gap_fill			WP_046216746.1
Bacillus_firmus_DS1			gap_fill			WP_035325923.1
Bacillus_flexus_27Col1_1E			gap_fill
Bacillus_fordii_DSM_16014			gap_fill			WP_026319774.1
Bacillus_halodurans_C_125			gap_fill
Bacillus_infantis_NRRL_B_14911			gap_fill			WP_009790813.1
Bacillus_licheniformis_5NAP23			gap_fill
Bacillus_licheniformis_ATCC_14580			gap_fill
Bacillus_licheniformis_HRBL_15TDI7			gap_fill
Bacillus_massilioanorexius_AP8			gap_fill			WP_019244583.1
Bacillus_massiliosenegalensis_JC6			gap_fill
Bacillus_megaterium_DSM319			gap_fill			WP_013084262.1
Bacillus_megaterium_NBRC_15308_ATCC_14581			gap_fill			WP_034650077.1
Bacillus_megaterium_NCT_2			gap_fill			WP_013058270.1
Bacillus_megaterium_QM_B1551			gap_fill			WP_013058270.1
Bacillus_megaterium_SF185			gap_fill			WP_013058270.1
Bacillus_megaterium_WSH_002			gap_fill
Bacillus_mojavensis_RO_H_1			gap_fill
Bacillus_mycoides_BHP			gap_fill			WP_042984394.1
Bacillus_mycoides_DSM_2048			gap_fill			WP_002127699.1
Bacillus_nealsonii_AAU1			gap_fill
Bacillus_pseudofirmus_OF4			gap_fill			WP_012957471.1
Bacillus_pseudomycoides_219298			gap_fill			WP_018766018.1
Bacillus_pumilus_ATCC_7061			gap_fill
Bacillus_pumilus_SAFR_032		gap_fill	gap_fill		gap_fill
Bacillus_pumilus_TUAT1			gap_fill
Bacillus_rubiinfantis_mt2			gap_fill
Bacillus_smithii_7_3_47FAA			gap_fill
Bacillus_sonorensis_L12			gap_fill
Bacillus_sp_7_6_55CFAA_CT2			gap_fill			WP_000661957.1
Bacillus_sp_B_jedd			gap_fill			WP_048824126.1
Bacillus_subtilis_BSn5			gap_fill
Bacillus_subtilis_B_1			gap_fill
Bacillus_subtilis_QB928			gap_fill
Bacillus_subtilis_str_168			gap_fill
Bacillus_subtilis_subsp_natto_BEST195			gap_fill
Bacillus_subtilis_subsp_spizizenii_ATCC_6633			gap_fill
Bacillus_subtilis_subsp_spizizenii_DV1_B_1			gap_fill
Bacillus_subtilis_subsp_spizizenii_str_W23			gap_fill
Bacillus_subtilis_subsp_spizizenii_TU_B_10			gap_fill
Bacillus_subtilis_subsp_subtilis_516_BAMY_102_633920_16710904			gap_fill
Bacillus_subtilis_subsp_subtilis_6051_HGW			gap_fill
Bacillus_subtilis_subsp_subtilis_str_BAB_1			gap_fill
Bacillus_subtilis_subsp_subtilis_str_BSP1			gap_fill
Bacillus_subtilis_subsp_subtilis_str_JH642			gap_fill
Bacillus_subtilis_subsp_subtilis_str_NCIB_3610			gap_fill
Bacillus_subtilis_subsp_subtilis_str_RO_NN_1			gap_fill
Bacillus_subtilis_subsp_subtilis_str_SMY			gap_fill
Bacillus_testis_DSM_101190			gap_fill			WP_050616442.1
Bacillus_thuringiensis_BMB171			gap_fill			WP_000661957.1
Bacillus_thuringiensis_Bt407			gap_fill			WP_000661957.1
Bacillus_thuringiensis_HD571			gap_fill			WP_000661967.1
Bacillus_thuringiensis_HD_771			gap_fill			WP_000661959.1
Bacillus_thuringiensis_HD_789			gap_fill			WP_000661940.1
Bacillus_thuringiensis_IBL_200			gap_fill			WP_000661956.1
Bacillus_thuringiensis_IBL_4222			gap_fill			WP_000661940.1
Bacillus_thuringiensis_MC28			gap_fill			WP_000661947.1
Bacillus_thuringiensis_serovar_andalousiensis_BGSC_4AW1			gap_fill			WP_000661968.1
Bacillus_thuringiensis_serovar_berliner_ATCC_10792			gap_fill			WP_000661957.1
Bacillus_thuringiensis_serovar_chinensis_CT_43			gap_fill			WP_000661957.1
Bacillus_thuringiensis_serovar_finitimus_YBT_020			gap_fill			WP_000661967.1
Bacillus_thuringiensis_serovar_huazhongensis_BGSC_4BD1			gap_fill			WP_000661941.1
Bacillus_thuringiensis_serovar_konkukian_str_97_27			gap_fill			WP_000661971.1
Bacillus_thuringiensis_serovar_kurstaki_str_HD73			gap_fill			WP_000661957.1
Bacillus_thuringiensis_serovar_kurstaki_str_T03a001			gap_fill			WP_000661957.1
Bacillus_thuringiensis_serovar_monterrey_BGSC_4AJ1			gap_fill			WP_000661968.1
Bacillus_thuringiensis_serovar_pakistani_str_T13001			gap_fill			WP_000661962.1
Bacillus_thuringiensis_serovar_pondicheriensis_BGSC_4BA1			gap_fill			WP_000661968.1
Bacillus_thuringiensis_serovar_pulsiensis_BGSC_4CC1			gap_fill			WP_000661967.1
Bacillus_thuringiensis_serovar_thuringiensis_str_IS5056			gap_fill			WP_000661957.1
Bacillus_thuringiensis_serovar_thuringiensis_str_T01001			gap_fill			WP_000661957.1
Bacillus_thuringiensis_serovar_tochigiensis_BGSC_4Y1			gap_fill			WP_000661967.1
Bacillus_thuringiensis_str_Al_Hakam			gap_fill			WP_000661967.1
Bacillus_timonensis_10403023			gap_fill			WP_010677304.1
Bacillus_velezensis_AS433			gap_fill
Bacillus_velezensis_L_H15			gap_fill
Bacillus_velezensis_UCMB5036			gap_fill
Bacteroides_acidifaciens_1e8A			gap_fill
Bacteroides_acidifaciens_JCM_10556			gap_fill
Bacteroides_barnesiae_DSM_18169_JCM_13652			gap_fill
Bacteroides_caccae_CL03T12C61			gap_fill		gap_fill
Bacteroides_caecimuris_I48			gap_fill
Bacteroides_cellulosilyticus_CL02T12C19			gap_fill		gap_fill
Bacteroides_cellulosilyticus_WH2			gap_fill
Bacteroides_coprosuis_DSM_18011			gap_fill
Bacteroides_dorei_CL02T00C15			gap_fill		gap_fill
Bacteroides_dorei_CL02T12C06			gap_fill		gap_fill
Bacteroides_dorei_CL03T12C01			gap_fill		gap_fill
Bacteroides_fragilis_638R			gap_fill
Bacteroides_fragilis_BOB25			gap_fill
Bacteroides_fragilis_CL03T00C08			gap_fill		gap_fill
Bacteroides_fragilis_CL03T12C07			gap_fill		gap_fill
Bacteroides_fragilis_CL05T00C42			gap_fill		gap_fill
Bacteroides_fragilis_CL05T12C13			gap_fill		gap_fill
Bacteroides_fragilis_CL07T00C01			gap_fill		gap_fill
Bacteroides_fragilis_CL07T12C05			gap_fill		gap_fill
Bacteroides_fragilis_HMW_610			gap_fill		gap_fill
Bacteroides_fragilis_HMW_615			gap_fill		gap_fill
Bacteroides_fragilis_HMW_616			gap_fill		gap_fill
Bacteroides_fragilis_str_3986_T_B_9			gap_fill
Bacteroides_fragilis_str_DS_208			gap_fill
Bacteroides_fragilis_YCH46			gap_fill
Bacteroides_gallinarum_DSM_18171_JCM_13658			gap_fill
Bacteroides_helcogenes_P_36_108			gap_fill
Bacteroides_intestinalis_KLE1704			gap_fill
Bacteroides_luti_DSM_26991			gap_fill
Bacteroides_neonati_MS4			gap_fill
Bacteroides_oleiciplenus_YIT_12058			gap_fill
Bacteroides_ovatus_3_8_47FAA			gap_fill		gap_fill
Bacteroides_ovatus_CL02T12C04			gap_fill		gap_fill
Bacteroides_ovatus_CL03T12C18			gap_fill		gap_fill
Bacteroides_propionicifaciens_DSM_19291_JCM_14649			gap_fill
Bacteroides_pyogenes_DSM20611							gap_fill
Bacteroides_pyogenes_F0041			gap_fill
Bacteroides_pyogenes_JCM_6292			gap_fill
Bacteroides_rodentium_JCM_16496			gap_fill
Bacteroides_salanitronis_DSM_18170			gap_fill
Bacteroides_salyersiae_CL02T12C01			gap_fill		gap_fill
Bacteroides_sartorii_dnLKV3			gap_fill
Bacteroides_sartorii_JCM_17136			gap_fill
Bacteroides_sp_14_A			gap_fill
Bacteroides_sp_HPS0048			gap_fill
Bacteroides_stercoris_CC31F			gap_fill		gap_fill
Bacteroides_thetaiotaomicron_7330			gap_fill
Bacteroides_thetaiotaomicron_CL09T03C10			gap_fill
Bacteroides_thetaiotaomicron_dnLKV9			gap_fill		gap_fill
Bacteroides_uniformis_CL03T00C23			gap_fill		gap_fill
Bacteroides_uniformis_CL03T12C37			gap_fill		gap_fill
Bacteroides_uniformis_dnLKV2			gap_fill		gap_fill
Bacteroides_uniformis_str_3978_T3_i			gap_fill
Bacteroides_vulgatus_CL09T03C04			gap_fill		gap_fill
Bacteroides_vulgatus_dnLKV7			gap_fill		gap_fill
Bacteroides_vulgatus_mpk			gap_fill
Bacteroides_vulgatus_PC510			gap_fill		gap_fill
Bacteroides_xylanisolvens_CL03T12C04			gap_fill		gap_fill
Bacteroides_xylanolyticus_DSM_3808			gap_fill
Bacteroidetes_bacterium_oral_taxon_272_str_F0290			gap_fill
Bacteroidetes_oral_taxon_274_str_F0058			gap_fill
Barnesiella_intestinihominis_YIT_11860			gap_fill
Barnesiella_viscericola_DSM_18177			gap_fill
Bartonella_quintana_Toulouse			WP_011179141.1
Bdellovibrio_bacteriovorus_HD100			gap_fill
Bdellovibrio_bacteriovorus_SSB218315			gap_fill
Bdellovibrio_bacteriovorus_str_Tiberius			gap_fill
Bdellovibrio_bacteriovorus_W			gap_fill
Beduini_massiliensis_DSM_100188			gap_fill
Bifidobacterium_adolescentis_ATCC_15703			gap_fill						WP_080505094.1
Bifidobacterium_adolescentis_BBMN23			gap_fill						WP_080548139.1
Bifidobacterium_adolescentis_DSM_20087			gap_fill						WP_080505094.1
Bifidobacterium_adolescentis_L2_32			gap_fill		gap_fill				WP_080548139.1
Bifidobacterium_angulatum_DSM_20098									WP_003825943.1
Bifidobacterium_angulatum_GT102			gap_fill						WP_045919943.1
Bifidobacterium_animalis_lactis_AD011									WP_004218709.1
Bifidobacterium_animalis_lactis_BB_12			gap_fill						WP_004218709.1
Bifidobacterium_animalis_lactis_Bi_07			gap_fill						WP_004218709.1
Bifidobacterium_animalis_lactis_Bl_04_ATCC_SD5219			gap_fill						WP_004218709.1
Bifidobacterium_animalis_lactis_CNCM_I_2494			gap_fill						WP_004218709.1
Bifidobacterium_animalis_lactis_DSM_10140			gap_fill						WP_004218709.1
Bifidobacterium_animalis_lactis_V9			gap_fill						WP_004218709.1
Bifidobacterium_animalis_RH			gap_fill						WP_004218709.1
Bifidobacterium_animalis_subsp_animalis_ATCC_25527			gap_fill		gap_fill				WP_014697969.1
Bifidobacterium_animalis_subsp_animalis_ATCC_27672			gap_fill						WP_052831907.1
Bifidobacterium_animalis_subsp_animalis_YL2			gap_fill						WP_014697969.1
Bifidobacterium_animalis_subsp_lactis_B420			gap_fill		gap_fill				WP_004218709.1
Bifidobacterium_animalis_subsp_lactis_BLC1			gap_fill		gap_fill				WP_004218709.1
Bifidobacterium_animalis_subsp_lactis_BS_01			gap_fill		gap_fill				WP_004218709.1
Bifidobacterium_animalis_subsp_lactis_HN019			gap_fill		gap_fill				WP_004218709.1
Bifidobacterium_asteroides_DSM_20089			gap_fill						WP_052108332.1
Bifidobacterium_asteroides_Hma3			gap_fill						WP_046323720.1
Bifidobacterium_asteroides_PRL2011			gap_fill						WP_052108332.1
Bifidobacterium_bifidum_156B			gap_fill						WP_021647923.1
Bifidobacterium_bifidum_ATCC_29521			gap_fill						WP_021647923.1
Bifidobacterium_bifidum_BGN4			gap_fill						WP_014760037.1
Bifidobacterium_bifidum_LMG_13195			gap_fill	WP_003817844.1	gap_fill				WP_003812431.1
Bifidobacterium_bifidum_NCIMB_41171									WP_003812431.1
Bifidobacterium_bifidum_PRL2010			gap_fill						WP_013389692.1
Bifidobacterium_bifidum_S17			gap_fill						WP_013363277.1
Bifidobacterium_boum_DSM_20432									WP_193352436.1
Bifidobacterium_breve_12L			gap_fill						WP_014483629.1
Bifidobacterium_breve_2L			gap_fill						WP_014483629.1
Bifidobacterium_breve_689b			gap_fill						WP_025263056.1
Bifidobacterium_breve_ACS_071_V_Sch8b			gap_fill		gap_fill				WP_014483629.1
Bifidobacterium_breve_CECT_7263			gap_fill		gap_fill				WP_003832129.1
Bifidobacterium_breve_DPC_6330			gap_fill		gap_fill				WP_014483629.1
Bifidobacterium_breve_DSM_20213			gap_fill		gap_fill				WP_003830617.1
Bifidobacterium_breve_HPH0326			gap_fill						WP_016462762.1
Bifidobacterium_breve_JCM_7017			gap_fill						WP_016462762.1
Bifidobacterium_breve_JCM_7019			gap_fill						WP_025221838.1
Bifidobacterium_breve_MCC_0121			gap_fill						WP_025263056.1
Bifidobacterium_breve_MCC_0305			gap_fill						WP_003830617.1
Bifidobacterium_breve_MCC_0476			gap_fill						WP_025263056.1
Bifidobacterium_breve_MCC_1094			gap_fill						WP_016462762.1
Bifidobacterium_breve_MCC_1114			gap_fill						WP_016462762.1
Bifidobacterium_breve_MCC_1128			gap_fill						WP_016462762.1
Bifidobacterium_breve_MCC_1340			gap_fill						WP_052792574.1
Bifidobacterium_breve_MCC_1454			gap_fill						WP_016462762.1
Bifidobacterium_breve_MCC_1604			gap_fill						WP_014483629.1
Bifidobacterium_breve_MCC_1605			gap_fill						WP_052787554.1
Bifidobacterium_breve_NCFB_2258			gap_fill						WP_025263056.1
Bifidobacterium_breve_UCC2003_NCIMB8807			gap_fill						WP_015438933.1
Bifidobacterium_catenulatum_DSM_16992									WP_172620118.1
Bifidobacterium_choerinum_DSM_20434			gap_fill						WP_051354857.1
Bifidobacterium_coryneforme_Bma6			gap_fill						WP_045921751.1
Bifidobacterium_coryneforme_DSM_20216									WP_033497449.1
Bifidobacterium_dentium_ATCC_27678			gap_fill						WP_187116118.1
Bifidobacterium_dentium_ATCC_27679			gap_fill		gap_fill				WP_003844008.1
Bifidobacterium_dentium_Bd1			gap_fill		gap_fill				WP_187116118.1
Bifidobacterium_dentium_JCM_1195_DSM_20436			gap_fill						WP_187116118.1
Bifidobacterium_dentium_JCVIHMP022			gap_fill		gap_fill				WP_003844008.1
Bifidobacterium_gallicum_DSM_20093									WP_044084905.1
Bifidobacterium_indicum_LMG_11587_DSM_20214			gap_fill						WP_033490801.1
Bifidobacterium_kashiwanohense_DSM_21854			gap_fill						WP_193786574.1
Bifidobacterium_longum_BG7			gap_fill						WP_060662232.1
Bifidobacterium_longum_BXY01			gap_fill						WP_013140908.1
Bifidobacterium_longum_DJO10A			gap_fill						WP_007056783.1
Bifidobacterium_longum_E18			gap_fill						WP_023658442.1
Bifidobacterium_longum_infantis_157F_NC									WP_007056783.1
Bifidobacterium_longum_infantis_ATCC_15697									WP_012577286.1
Bifidobacterium_longum_longum_ATCC_55813									WP_007054455.1
Bifidobacterium_longum_longum_BBMN68			gap_fill						WP_011068024.1
Bifidobacterium_longum_longum_CCUG_52486									WP_007056783.1
Bifidobacterium_longum_longum_JCM_1217			gap_fill						WP_013582808.1
Bifidobacterium_longum_longum_JDM301			gap_fill						WP_013140908.1
Bifidobacterium_longum_NCC2705									WP_011068024.1
Bifidobacterium_longum_subsp_infantis_BT1			gap_fill						WP_012577286.1
Bifidobacterium_longum_subsp_longum_1_6B			gap_fill		gap_fill				WP_007055254.1
Bifidobacterium_longum_subsp_longum_2_2B			gap_fill		gap_fill				WP_007056783.1
Bifidobacterium_longum_subsp_longum_35B			gap_fill		gap_fill				WP_007056783.1
Bifidobacterium_longum_subsp_longum_44B			gap_fill		gap_fill				WP_007058614.1
Bifidobacterium_longum_subsp_longum_CMCC_P0001			gap_fill		gap_fill				WP_013140908.1
Bifidobacterium_longum_subsp_longum_F8			gap_fill		gap_fill				WP_007056783.1
Bifidobacterium_longum_subsp_longum_KACC_91563			gap_fill		gap_fill				WP_011068024.1
Bifidobacterium_longum_subsp_longum_NCIMB8809			gap_fill						WP_058062656.1
Bifidobacterium_mongoliense_DSM_21395									WP_033511181.1
Bifidobacterium_pseudocatenulatum_DSM_20438									WP_231857852.1
Bifidobacterium_pseudocatenulatum_IPLA36007			gap_fill						WP_233432625.1
Bifidobacterium_pseudolongum_subsp_Pseudolongum_DSM_20099									WP_051918277.1
Bifidobacterium_pullorum_DSM_20433			gap_fill						WP_052122554.1
Bifidobacterium_pullorum_LMG_21816			gap_fill						WP_043168570.1
Bifidobacterium_ruminantium_DSM_6489			gap_fill						WP_193345874.1
Bifidobacterium_scardovii_JCM_12489									WP_046726173.1
Bifidobacterium_sp_MSTE12			gap_fill						WP_171843691.1
Bifidobacterium_stercoris_DSM_24849			gap_fill						WP_080723519.1
Bifidobacterium_thermacidophilum_subsp_thermacidophilum_DSM_15837			gap_fill						WP_081666410.1
Bifidobacterium_thermophilum_RBL67									WP_144053483.1
Bilophila_sp_4_1_30			gap_fill
Bilophila_wadsworthia_ATCC_49260			gap_fill
Bittarella_massiliensis_GD6			gap_fill
Blastococcus_massiliensis_AP3						WP_040339555.1			WP_051515618.1
Blautia_coccoides_YL58			gap_fill
Blautia_obeum_ATCC_29174			gap_fill
Blautia_producta_DSM_2950			gap_fill
Blautia_sp_YL58			gap_fill
Blautia_wexlerae_AGR2146			gap_fill
Blautia_wexlerae_DSM_19850			gap_fill
Bordetella_hinzii_F582			WP_029579904.1	WP_029579904.1		WP_029579351.1
Bordetella_hinzii_OH87_BAL007II			WP_029579904.1			WP_032955584.1
Borkfalkia_ceftriaxoniphila_HDS1380			gap_fill						WP_129223175.1
Bosea_thiooxidans_DSM_9653			WP_055730267.1	WP_055730267.1
Brachybacterium_paraconglomeratum_LC44			gap_fill						WP_010551504.1
Brachyspira_aalborgi_513A			gap_fill
Brachyspira_aalborgi_PC2022III			gap_fill
Brachyspira_aalborgi_PC2777IV			gap_fill
Brachyspira_aalborgi_PC3053II			gap_fill
Brachyspira_aalborgi_PC3517II			gap_fill
Brachyspira_aalborgi_PC3714II			gap_fill
Brachyspira_aalborgi_PC390II			gap_fill
Brachyspira_aalborgi_PC3939II			gap_fill
Brachyspira_aalborgi_PC3997IV			gap_fill
Brachyspira_aalborgi_PC4226IV			gap_fill
Brachyspira_aalborgi_PC4580III			gap_fill
Brachyspira_aalborgi_PC4597II			gap_fill
Brachyspira_aalborgi_PC5099IV			gap_fill
Brachyspira_aalborgi_PC5538III_lc			gap_fill
Brachyspira_aalborgi_PC5587_p			gap_fill
Brachyspira_aalborgi_PC5587_u			gap_fill
Brachyspira_aalborgi_W1			gap_fill
Brachyspira_pilosicoli_95_1000		gap_fill	gap_fill
Brachyspira_pilosicoli_P43_6_78		gap_fill	gap_fill
Brachyspira_pilosicoli_WesB		gap_fill	gap_fill
Bradyrhizobium_elkanii_USDA_76			WP_018269785.1
Bradyrhizobium_japonicum_E109			WP_014491928.1	WP_014491928.1		WP_014495717.1
Bradyrhizobium_japonicum_USDA_110			WP_011090253.1	WP_011090253.1		WP_011086931.1
Bradyrhizobium_japonicum_USDA_124			WP_018648414.1	WP_018648414.1		WP_018644742.1
Bradyrhizobium_japonicum_USDA_6			WP_014491928.1			WP_014495717.1
Bradyrhizobium_japonicum_WSM2793			WP_018321915.1	WP_018321915.1		WP_018317492.1
Bradyrhizobium_yuanmingense_BR3267			WP_057027639.1	WP_057027639.1		WP_036033884.1
Bradyrhizobium_yuanmingense_CCBAU_05623			WP_050991836.1	WP_050991836.1		WP_036033884.1
Bradyrhizobium_yuanmingense_CCBAU_25021			WP_036027071.1	WP_036027071.1		WP_036022774.1
Bradyrhizobium_yuanmingense_CCBAU_35157			WP_036014265.1	WP_036014265.1		WP_036000404.1
Brevibacillus_agri_5_2			gap_fill			WP_005829598.1
Brevibacillus_agri_BAB_2500			gap_fill			WP_005829598.1
Brevibacillus_borstelensis_AK1			gap_fill			WP_003386180.1
Brevibacillus_brevis_FJAT_0809_GLX			gap_fill			WP_016740511.1
Brevibacillus_brevis_NBRC_100599			gap_fill			WP_015891010.1
Brevibacterium_casei_S18						WP_009376457.1			WP_009379995.1
Brevibacterium_massiliense_5401308									WP_019175320.1
Brevibacterium_senegalense_JC43			gap_fill						WP_019159828.1
Brevundimonas_bacteroides_DSM_4726			WP_029416006.1			WP_029414846.1
Brevundimonas_diminuta_470_4			WP_003170376.1			WP_035283650.1
Brevundimonas_subvibrioides_ATCC_15264			WP_013268329.1	WP_013268329.1		WP_218915410.1
Brochothrix_thermosphacta_DSM_20171			gap_fill
Burkholderiales_bacterium_YL45			gap_fill
Burkholderia_cenocepacia_H111	WP_006482306.1		WP_006497506.1	WP_006497506.1		WP_006482479.1					gap_fill
Burkholderia_cenocepacia_HI2424	WP_011548708.1		WP_011544625.1	WP_011544625.1		WP_011546068.1					gap_fill
Burkholderia_cenocepacia_J2315	WP_006482306.1		WP_006483666.1	WP_006483666.1		WP_006482479.1					gap_fill
Burkholderia_cenocepacia_MC0_3	WP_011548708.1		WP_012327930.1	WP_012327930.1		WP_034201423.1					gap_fill
Burkholderia_cenocepacia_PC184	WP_011548708.1		WP_034174254.1	WP_034174254.1		WP_108725750.1					gap_fill
Burkholderia_cepacia_GG4			WP_014898032.1			WP_014896212.1
Burkholderia_cepacia_LO6			WP_035973019.1	WP_035973019.1		WP_006763548.1
Butyricimonas_sp_Marseille_P2440			gap_fill
Butyrivibrio_proteoclasticus_B316			gap_fill
Caecibacter_massiliensis_DSM_100188			gap_fill
Campylobacter_coli_1098			gap_fill
Campylobacter_coli_111_3			gap_fill
Campylobacter_coli_1148			gap_fill
Campylobacter_coli_132_6			gap_fill
Campylobacter_coli_1417			gap_fill
Campylobacter_coli_14983A			gap_fill
Campylobacter_coli_151_9			gap_fill
Campylobacter_coli_1891			gap_fill
Campylobacter_coli_1909			gap_fill
Campylobacter_coli_1948			gap_fill
Campylobacter_coli_1957			gap_fill
Campylobacter_coli_1961			gap_fill
Campylobacter_coli_202_04			gap_fill
Campylobacter_coli_2548			gap_fill
Campylobacter_coli_2553			gap_fill
Campylobacter_coli_2680			gap_fill
Campylobacter_coli_2685			gap_fill
Campylobacter_coli_2698			gap_fill
Campylobacter_coli_317_04			gap_fill
Campylobacter_coli_37_05			gap_fill
Campylobacter_coli_59_2			gap_fill
Campylobacter_coli_67_8			gap_fill
Campylobacter_coli_7_1			gap_fill
Campylobacter_coli_80352			gap_fill
Campylobacter_coli_84_2			gap_fill
Campylobacter_coli_86119			gap_fill
Campylobacter_coli_90_3			gap_fill
Campylobacter_coli_BFR_CA_9557			gap_fill
Campylobacter_coli_BIGS0003			gap_fill
Campylobacter_coli_H56			gap_fill
Campylobacter_coli_H6			gap_fill
Campylobacter_coli_H8			gap_fill
Campylobacter_coli_H9			gap_fill
Campylobacter_coli_LMG_23336			gap_fill
Campylobacter_coli_LMG_23341			gap_fill
Campylobacter_coli_LMG_23342			gap_fill
Campylobacter_coli_LMG_9853			gap_fill
Campylobacter_coli_LMG_9854			gap_fill
Campylobacter_coli_LMG_9860			gap_fill
Campylobacter_coli_RM2228			gap_fill
Campylobacter_coli_YH501			gap_fill
Campylobacter_coli_Z156			gap_fill
Campylobacter_coli_Z163			gap_fill
Campylobacter_concisus_13826			gap_fill
Campylobacter_concisus_UNSWCD			gap_fill
Campylobacter_curvus_525_92			gap_fill
Campylobacter_curvus_DSM_6644			gap_fill
Campylobacter_fetus_subsp_fetus_006A_0073			gap_fill
Campylobacter_fetus_subsp_fetus_82_40			gap_fill
Campylobacter_fetus_subsp_venerealis_NCTC_10354			gap_fill
Campylobacter_hominis_ATCC_BAA_381			gap_fill
Campylobacter_hyointestinalis_subsp_hyointestinalis_LMG_9260			gap_fill
Campylobacter_jejuni_CJM1cam			gap_fill
Campylobacter_jejuni_jejuni_81_176			gap_fill
Campylobacter_jejuni_jejuni_ICDCCJ07004			gap_fill
Campylobacter_jejuni_jejuni_M1			gap_fill
Campylobacter_jejuni_jejuni_NCTC_11168			gap_fill
Campylobacter_jejuni_NCTC11351			gap_fill
Campylobacter_jejuni_RM1221			gap_fill
Campylobacter_jejuni_str_NCCP_No_15742			gap_fill
Campylobacter_jejuni_subsp_doylei_269_97			gap_fill
Campylobacter_jejuni_subsp_jejuni_04197			gap_fill
Campylobacter_jejuni_subsp_jejuni_04199			gap_fill
Campylobacter_jejuni_subsp_jejuni_110_21			gap_fill
Campylobacter_jejuni_subsp_jejuni_1213			gap_fill
Campylobacter_jejuni_subsp_jejuni_129_258			gap_fill
Campylobacter_jejuni_subsp_jejuni_1336			gap_fill
Campylobacter_jejuni_subsp_jejuni_140_16			gap_fill
Campylobacter_jejuni_subsp_jejuni_1798			gap_fill
Campylobacter_jejuni_subsp_jejuni_1854			gap_fill
Campylobacter_jejuni_subsp_jejuni_1893			gap_fill
Campylobacter_jejuni_subsp_jejuni_1997_1			gap_fill
Campylobacter_jejuni_subsp_jejuni_1997_11			gap_fill
Campylobacter_jejuni_subsp_jejuni_1997_7			gap_fill
Campylobacter_jejuni_subsp_jejuni_2008_1025			gap_fill
Campylobacter_jejuni_subsp_jejuni_2008_831			gap_fill
Campylobacter_jejuni_subsp_jejuni_2008_894			gap_fill
Campylobacter_jejuni_subsp_jejuni_2008_988			gap_fill
Campylobacter_jejuni_subsp_jejuni_260_94			gap_fill
Campylobacter_jejuni_subsp_jejuni_414			gap_fill
Campylobacter_jejuni_subsp_jejuni_51037			gap_fill
Campylobacter_jejuni_subsp_jejuni_53161			gap_fill
Campylobacter_jejuni_subsp_jejuni_55037			gap_fill
Campylobacter_jejuni_subsp_jejuni_60004			gap_fill
Campylobacter_jejuni_subsp_jejuni_6399			gap_fill
Campylobacter_jejuni_subsp_jejuni_81116			gap_fill
Campylobacter_jejuni_subsp_jejuni_84_25			gap_fill
Campylobacter_jejuni_subsp_jejuni_86605			gap_fill
Campylobacter_jejuni_subsp_jejuni_87330			gap_fill
Campylobacter_jejuni_subsp_jejuni_CF93_6			gap_fill
Campylobacter_jejuni_subsp_jejuni_CG8421			gap_fill
Campylobacter_jejuni_subsp_jejuni_D2600			gap_fill
Campylobacter_jejuni_subsp_jejuni_H22082			gap_fill
Campylobacter_jejuni_subsp_jejuni_HB93_13			gap_fill
Campylobacter_jejuni_subsp_jejuni_IA3902			gap_fill
Campylobacter_jejuni_subsp_jejuni_ICDCCJ07002			gap_fill
Campylobacter_jejuni_subsp_jejuni_LMG_23210			gap_fill
Campylobacter_jejuni_subsp_jejuni_LMG_23211			gap_fill
Campylobacter_jejuni_subsp_jejuni_LMG_23216			gap_fill
Campylobacter_jejuni_subsp_jejuni_LMG_23218			gap_fill
Campylobacter_jejuni_subsp_jejuni_LMG_23223			gap_fill
Campylobacter_jejuni_subsp_jejuni_LMG_23264			gap_fill
Campylobacter_jejuni_subsp_jejuni_LMG_23269			gap_fill
Campylobacter_jejuni_subsp_jejuni_LMG_23357			gap_fill
Campylobacter_jejuni_subsp_jejuni_LMG_9081			gap_fill
Campylobacter_jejuni_subsp_jejuni_LMG_9217			gap_fill
Campylobacter_jejuni_subsp_jejuni_LMG_9872			gap_fill
Campylobacter_jejuni_subsp_jejuni_LMG_9879			gap_fill
Campylobacter_jejuni_subsp_jejuni_NCTC_11168_BN148			gap_fill
Campylobacter_jejuni_subsp_jejuni_NW			gap_fill
Campylobacter_jejuni_subsp_jejuni_P110B			gap_fill
Campylobacter_jejuni_subsp_jejuni_P854			gap_fill
Campylobacter_jejuni_subsp_jejuni_PT14			gap_fill
Campylobacter_jejuni_subsp_jejuni_RB922			gap_fill
Campylobacter_jejuni_subsp_jejuni_S3			gap_fill
Campylobacter_jejuni_subsp_jejuni_xy259			gap_fill
Campylobacter_showae_RM3277			gap_fill		gap_fill
Campylobacter_sputorum_bv_faecalis_CCUG_20703			gap_fill
Campylobacter_sp_10_1_50			gap_fill
Campylobacter_troglodytis_MIT_05_9149A			gap_fill
Campylobacter_upsaliensis_RM3195			gap_fill
Campylobacter_ureolyticus_ACS_301_V_Sch3b			gap_fill
Campylobacter_ureolyticus_CIT007			gap_fill
Campylobacter_ureolyticus_RIGS_9880			gap_fill
Campylobacter_ureolyticus_UMB0112			gap_fill
Candidatus_Dorea_massiliensis_AP6			gap_fill
Candidatus_Pelagibacter_sp_IMCC9063			WP_013695304.1	WP_013695304.1
Candidatus_Soleaferrea_massiliensis_AP7			gap_fill
Capnocytophaga_leadbetteri_DSM_22902			gap_fill
Capnocytophaga_ochracea_F0287					gap_fill
Capnocytophaga_ochracea_str_Holt_25					gap_fill
Capnocytophaga_sp_CM59			gap_fill
Capnocytophaga_sp_oral_taxon_326_str_F0382			gap_fill
Capnocytophaga_sp_oral_taxon_329_str_F0087			gap_fill
Capnocytophaga_sp_oral_taxon_332_str_F0381			gap_fill
Capnocytophaga_sp_oral_taxon_335_str_F0486			gap_fill
Capnocytophaga_sp_oral_taxon_336_str_F0502			gap_fill
Capnocytophaga_sp_oral_taxon_338_str_F0234			gap_fill
Capnocytophaga_sp_oral_taxon_412_str_F0487			gap_fill
Cardiobacterium_hominis_612_ETAR_1001_5485_127101			WP_004141016.1	WP_004141016.1
Cardiobacterium_valvarum_F0432			(WP_006984637.1 or WP_006985598.1)	(WP_006984637.1 or WP_006985598.1)
Catonella_morbi_ATCC_51271			gap_fill
Cedecea_davisae_DSM_4568			WP_016517423.1
Cellulomonas_massiliensis_JC225			gap_fill						WP_019137218.1
Cellulomonas_massiliensis_MGYG_HGUT_01416			gap_fill						WP_019137218.1
Cellulomonas_timonensis_DSM_100699			gap_fill						WP_066588280.1
Cellulosimicrobium_cellulans_J36									WP_051471754.1
Centipeda_periodontii_DSM_2778			gap_fill
Cetobacterium_somerae_ATCC_BAA_47401			gap_fill
Chlorobium_phaeobacteroides_DSM_266			gap_fill				WP_011746095.1
Christensenella_minuta_DSM_22607			gap_fill						WP_066523173.1
Christensenella_timonensis_DSM_102800			gap_fill						WP_066645696.1
Citrobacter_amalonaticus_FDAARGOS_122			WP_061075584.1	WP_061075584.1
Citrobacter_amalonaticus_FDAARGOS_166			WP_044253361.1	WP_044253361.1
Citrobacter_amalonaticus_Y19			WP_046493897.1
Citrobacter_amalonaticus_YG6			WP_044253361.1	WP_044253361.1
Citrobacter_amalonaticus_YG8			WP_044253361.1	WP_044253361.1
Citrobacter_freundii_4_7_47CFAA			WP_003826589.1	WP_003826589.1	WP_003825185.1 or HMPREF9428_RS23370
Citrobacter_freundii_ATCC_8090			WP_003841368.1
Citrobacter_freundii_FDAARGOS_61			WP_047407218.1	WP_047407218.1
Citrobacter_freundii_FDAARGOS_73			WP_003031690.1	WP_003031690.1
Citrobacter_freundii_GTC_09479			WP_003844715.1	WP_003844715.1	WP_003028801.1 or H262_RS00840
Citrobacter_freundii_GTC_09629			WP_003031690.1	WP_003031690.1	WP_003028801.1 or H922_RS10835
Citrobacter_freundii_str_ballerup_7851_39		gap_fill	WP_016155441.1	WP_016155441.1	gap_fill
Citrobacter_freundii_UCI_31			WP_003031690.1
Citrobacter_koseri_ATCC_BAA_895			WP_012134645.1
Citrobacter_koseri_FDAARGOS_164			WP_012134645.1	WP_012134645.1
Citrobacter_portucalensis_P10159			WP_003826589.1	WP_003826589.1
Citrobacter_rodentium_ICC168			WP_012907700.1	WP_012907700.1
Citrobacter_sp_30_2			WP_003826589.1
Citrobacter_sp_A1			WP_003031690.1	WP_003031690.1
Citrobacter_sp_KTE151			WP_003826589.1	WP_003826589.1
Citrobacter_sp_KTE30			WP_016149402.1	WP_016149402.1
Citrobacter_sp_KTE32			WP_016155441.1	WP_016155441.1
Citrobacter_sp_L17			WP_003031690.1	WP_003031690.1
Citrobacter_youngae_ATCC_29220			WP_006688306.1
Cloacibacillus_evryensis_DSM_19522			gap_fill
Cloacibacterium_normanense_DSM_15886			gap_fill
Clostridioides_difficile_002_P50_2011		gap_fill	gap_fill
Clostridioides_difficile_050_P50_2011		gap_fill	gap_fill
Clostridioides_difficile_2007855			gap_fill
Clostridioides_difficile_630		gap_fill	gap_fill
Clostridioides_difficile_6503		gap_fill	gap_fill
Clostridioides_difficile_70_100_2010		HMPREF9945_RS09350 or HMPREF9945_RS02925 or HMPREF9945_RS01060 or WP_004454201.1	gap_fill
Clostridioides_difficile_ATCC_43255		WP_004454201.1 or UAB_RS0207585 or UAB_RS0213810 or UAB_RS0205455 or UAB_RS0216325	gap_fill
Clostridioides_difficile_ATCC_9689		M018_RS0103665 or WP_004454201.1 or M018_RS0117210 or M018_RS0102250	gap_fill
Clostridioides_difficile_CD37		gap_fill	gap_fill
Clostridioides_difficile_CIP_107932		EAA_RS0204420 or WP_004454201.1 or EAA_RS0212580 or EAA_RS0206410	gap_fill
Clostridioides_difficile_M120		gap_fill	gap_fill
Clostridioides_difficile_M68		gap_fill	gap_fill
Clostridioides_difficile_QCD_23m63		gap_fill	gap_fill
Clostridioides_difficile_QCD_37x79		WP_004454201.1 or AEC_RS0216675 or AEC_RS0207980 or AEC_RS0214155 or AEC_RS0205965	gap_fill
Clostridioides_difficile_QCD_63q42		QAB_RS0217460 or QAB_RS0214945 or QAB_RS0206480 or WP_004454201.1	gap_fill
Clostridioides_difficile_QCD_66c26		QAC_RS0215210 or QAC_RS0204495 or QAC_RS0206510 or WP_004454201.1 or QAC_RS0212670	gap_fill
Clostridioides_difficile_QCD_76w55		UAA_RS0214560 or UAA_RS0217115 or UAA_RS0208380 or UAA_RS0206380 or WP_004454201.1	gap_fill
Clostridioides_difficile_QCD_97b34		QAD_RS0215320 or QAD_RS0206695 or WP_004454201.1 or QAD_RS0204720 or QAD_RS0212825	gap_fill
Clostridioides_mangenotii_LM2			gap_fill
Clostridioides_mangenotii_TR			gap_fill
Clostridium_acetobutylicum_ATCC_824			gap_fill
Clostridium_acetobutylicum_DSM_1731			gap_fill
Clostridium_acetobutylicum_EA_2018			gap_fill
Clostridium_aerotolerans_DSM_5434			gap_fill
Clostridium_baratii_796_15			gap_fill
Clostridium_baratii_str_Sullivan			gap_fill
Clostridium_beijerinckii_G117		gap_fill	gap_fill		gap_fill
Clostridium_beijerinckii_NCIMB_8052			gap_fill
Clostridium_bifermentans_ATCC_19299			gap_fill
Clostridium_bolteae_90A5			gap_fill
Clostridium_bolteae_90A9			gap_fill
Clostridium_bolteae_90B3			gap_fill
Clostridium_bolteae_90B7			gap_fill
Clostridium_bolteae_90B8			gap_fill
Clostridium_bolteae_WAL_14578			gap_fill
Clostridium_botulinum_A2_str_Kyoto		CLM_RS01520 or WP_011948070.1 or CLM_RS01570 or CLM_RS01625	gap_fill
Clostridium_botulinum_A3_str_Loch_Maree		gap_fill	gap_fill
Clostridium_botulinum_A_str_ATCC_19397			gap_fill
Clostridium_botulinum_B1_str_Okra		gap_fill	gap_fill
Clostridium_botulinum_Ba4_str_657		gap_fill	gap_fill
Clostridium_botulinum_Bf			gap_fill
Clostridium_botulinum_BKT015925			gap_fill
Clostridium_botulinum_B_str_Eklund_17B			gap_fill
Clostridium_botulinum_CB11_1_1			gap_fill
Clostridium_botulinum_CDC66177		gap_fill	gap_fill
Clostridium_botulinum_C_str_Eklund			gap_fill
Clostridium_botulinum_E3_str_Alaska_E43			gap_fill
Clostridium_botulinum_F_str_230613			gap_fill
Clostridium_botulinum_F_str_Langeland		CLI_RS01555 or CLI_RS01610 or WP_011948070.1 or CLI_RS01665	gap_fill
Clostridium_botulinum_H04402_065		WP_011948070.1 or H04402_RS01515 or H04402_RS01570 or H04402_RS01465	gap_fill
Clostridium_botulinum_NCTC_2916		gap_fill	gap_fill
Clostridium_butyricum_5521		CBY_RS05215 or WP_003413235.1	gap_fill
Clostridium_butyricum_60E_3		gap_fill	gap_fill
Clostridium_butyricum_DKU_01		gap_fill	gap_fill
Clostridium_butyricum_DSM_10702			gap_fill
Clostridium_butyricum_E4_str_BoNT_E_BL5262			gap_fill
Clostridium_cadaveris_AGR2141			gap_fill
Clostridium_chauvoei_JF4335			gap_fill
Clostridium_citroniae_WAL_17108			gap_fill
Clostridium_clariflavum_DSM_19732			gap_fill
Clostridium_clostridioforme_2_1_49FAA			gap_fill
Clostridium_clostridioforme_90A1			gap_fill
Clostridium_clostridioforme_90A3			gap_fill
Clostridium_clostridioforme_90A4			gap_fill
Clostridium_clostridioforme_90A6			gap_fill
Clostridium_clostridioforme_90A7		gap_fill	gap_fill
Clostridium_clostridioforme_90A8			gap_fill
Clostridium_clostridioforme_90B1			gap_fill
Clostridium_clostridioforme_CM201			gap_fill
Clostridium_clostridioforme_YL32			gap_fill
Clostridium_cochlearium_NCTC13027			gap_fill
Clostridium_cocleatum_ATCC_29902			gap_fill
Clostridium_colicanis_209318			gap_fill
Clostridium_colicanis_DSM_13634			gap_fill
Clostridium_dakarense_FF1			gap_fill
Clostridium_difficile_CD196			gap_fill
Clostridium_disporicum_2789STDY5608827			gap_fill
Clostridium_glycolicum_ATCC_14880			gap_fill
Clostridium_ihumii_AP5			gap_fill
Clostridium_indolis_DSM_755			gap_fill
Clostridium_innocuum_2959			gap_fill
Clostridium_innocuum_I46			gap_fill
Clostridium_isatidis_DSM_15098			gap_fill
Clostridium_jeddahense_JCD			gap_fill
Clostridium_lavalense_NLAE_zl_G277			gap_fill
Clostridium_massilioamazoniensis_ND2			gap_fill
Clostridium_mediterraneense_Marseille_P2434			gap_fill
Clostridium_methoxybenzovorans_SR3			gap_fill
Clostridium_niameyense_DSM_100441			gap_fill
Clostridium_papyrosolvens_C7			gap_fill
Clostridium_paraputrificum_AGR2156			gap_fill
Clostridium_pasteurianum_BC1			gap_fill
Clostridium_pasteurianum_DSM_525_ATCC_6013			gap_fill
Clostridium_perfringens_B_str_ATCC_3626			gap_fill
Clostridium_perfringens_CPE_str_F4969		gap_fill	gap_fill
Clostridium_perfringens_C_str_JGS1495			gap_fill
Clostridium_perfringens_D_str_JGS1721		gap_fill	gap_fill							WP_003476407.1
Clostridium_perfringens_E_str_JGS1987		gap_fill	gap_fill
Clostridium_perfringens_F262			gap_fill							WP_003480087.1
Clostridium_perfringens_NCTC_8239		gap_fill	gap_fill
Clostridium_perfringens_str_13		gap_fill	gap_fill
Clostridium_perfringens_WAL_14572		gap_fill	gap_fill							WP_003478914.1
Clostridium_phoceensis_DSM_100334			gap_fill
Clostridium_saccharogumia_DSM_17460			gap_fill
Clostridium_saccharolyticum_WM1			gap_fill
Clostridium_saccharoperbutylacetonicum_N1_4_HMT			gap_fill
Clostridium_saudiense_JCC			gap_fill
Clostridium_senegalense_JC122			gap_fill
Clostridium_sordellii_ATCC_9714			gap_fill
Clostridium_sphenoides_JCM_1415			gap_fill
Clostridium_sporogenes_ATCC_15579			gap_fill
Clostridium_sporogenes_PA_3679		gap_fill	gap_fill
Clostridium_sp_7_3_54FAA			gap_fill
Clostridium_sp_ASF356			gap_fill
Clostridium_sp_AT4			gap_fill
Clostridium_sp_ATCC_29733			gap_fill
Clostridium_sp_ATCC_BAA_442			gap_fill
Clostridium_sp_BNL1100			gap_fill
Clostridium_sp_HGF2			gap_fill
Clostridium_sp_KLE_1755			gap_fill
Clostridium_sp_Marseille_P2538			gap_fill
Clostridium_sp_MSTE9			gap_fill
Clostridium_sp_SY8519			gap_fill
Clostridium_stercorarium_subsp_leptospartum_DSM_9219			gap_fill
Clostridium_stercorarium_subsp_stercorarium_DSM_8532			gap_fill
Clostridium_stercorarium_subsp_thermolacticum_DSM_2910			gap_fill
Clostridium_sticklandii_DSM_519			gap_fill
Clostridium_sulfidigenes_113A_c1			gap_fill
Clostridium_symbiosum_ATCC_14940			gap_fill
Clostridium_tertium_Gcol_A43_Gcol_A43_1			gap_fill
Clostridium_tyrobutyricum_UC7086			gap_fill
Clostridium_viride_DSM_6836			gap_fill
Cohnella_laeviribosi_DSM_21336			gap_fill
Collinsella_ihuae_GD8			gap_fill						WP_066832238.1
Collinsella_massiliensis_An5									WP_094335290.1
Collinsella_sp_4_8_47FAA			gap_fill
Collinsella_sp_MS5			gap_fill
Collinsella_tanakaei_YIT_12063			gap_fill						WP_009140496.1
Comamonas_aquatica_CJG			WP_043383839.1	WP_043383839.1
Comamonas_aquatica_DA1877			WP_043383839.1	WP_043383839.1
Comamonas_aquatica_NBRC_14918			WP_042417485.1	WP_042417485.1
Comamonas_terrigena_FDAARGOS_394_pRIID_98			WP_066541344.1	WP_066541344.1		WP_066536592.1
Comamonas_terrigena_NBRC_13299			WP_066541344.1	WP_066541344.1		WP_066536592.1
Comamonas_testosteroni_ATCC_11996			WP_003076209.1	WP_003076209.1		WP_034349541.1
Comamonas_testosteroni_CNB_2			WP_012840099.1			WP_003067178.1
Comamonas_testosteroni_KF_1			WP_003050475.1	WP_003050475.1		WP_003052535.1
Comamonas_testosteroni_NBRC_100989			WP_003050475.1	WP_003050475.1		WP_003052535.1
Comamonas_testosteroni_S44			WP_003068384.1	WP_003068384.1		WP_003067178.1
Coprobacillus_cateniformis_D6			gap_fill
Coprobacillus_sp_3_3_56FAA			gap_fill
Coprobacillus_sp_8_2_54BFAA			gap_fill
Coprobacter_fastidiosus_NSB1			gap_fill
Coprococcus_sp_HPP0048			gap_fill
Coprococcus_sp_HPP0074			gap_fill
Corynebacterium_accolens_AH4003			gap_fill						WP_096337280.1
Corynebacterium_accolens_ATCC_49725			gap_fill						WP_005276414.1
Corynebacterium_ammoniagenes_DSM_20306			gap_fill						WP_040354730.1
Corynebacterium_amycolatum_SK46									WP_005510941.1
Corynebacterium_argentoratense_CNM_46305_c1			gap_fill						WP_046204808.1
Corynebacterium_argentoratense_DSM_44202			gap_fill						WP_041747204.1
Corynebacterium_aurimucosum_ATCC_700975			gap_fill						WP_010188399.1
Corynebacterium_bouchesdurhonense_DSM_100846			gap_fill						WP_066528568.1
Corynebacterium_casei_LMG_S_19264			gap_fill						WP_025386955.1
Corynebacterium_casei_UCMA_3821			gap_fill						WP_006821850.1
Corynebacterium_coyleae_UMB0147_16933_8_1_1			gap_fill						WP_070421604.1
Corynebacterium_durum_F0235			gap_fill						WP_040358234.1
Corynebacterium_efficiens_YS_314			gap_fill						WP_035109076.1
Corynebacterium_glucuronolyticum_ATCC_51866	WP_034989416.1		gap_fill		HMPREF0293_RS06800 or WP_005390615.1				WP_005392737.1
Corynebacterium_glucuronolyticum_ATCC_51867									WP_005390976.1
Corynebacterium_ihumii_GD7			gap_fill						WP_034996868.1
Corynebacterium_jeddahense_JCB			gap_fill						WP_042408596.1
Corynebacterium_jeikeium_Cj30184_10			gap_fill						WP_051893596.1
Corynebacterium_kroppenstedtii_DNF00591			gap_fill						WP_082089996.1
Corynebacterium_kroppenstedtii_DSM_44385									WP_041629028.1
Corynebacterium_mastitidis_DSM_44356			gap_fill						WP_018118244.1
Corynebacterium_matruchotii_ATCC_14266			gap_fill						WP_005524446.1
Corynebacterium_matruchotii_ATCC_33806			gap_fill						WP_005519310.1
Corynebacterium_matruchotii_NCTC10254			gap_fill						WP_005524446.1
Corynebacterium_phoceense_DSM_100570			gap_fill
Corynebacterium_propinquum_DSM_44285									WP_026167809.1
Corynebacterium_provencense_DSM_101074			gap_fill						gap_fill
Corynebacterium_pseudodiphtheriticum_DSM_44287			gap_fill						WP_027017384.1
Corynebacterium_pseudogenitalium_ATCC_33035			gap_fill						WP_005323177.1
Corynebacterium_sp_HFH0082			gap_fill						WP_016421844.1
Corynebacterium_striatum_ATCC_6940			gap_fill						WP_005530400.1
Corynebacterium_tuberculostearicum_SK141			gap_fill						WP_005327391.1
Corynebacterium_ulcerans_BR_AD22			gap_fill		WP_038619789.1 or CULC22_RS01700				WP_029975116.1
Corynebacterium_ureicelerivorans_DSM_45051									WP_038609130.1
Corynebacterium_variabile_DSM_44702			gap_fill						WP_041630763.1
Corynebacterium_variabile_Mu292			gap_fill						WP_176702179.1
Cronobacter_sakazakii_2151		gap_fill	WP_004388586.1	WP_004388586.1	UOI_RS0103190 or WP_004385734.1
Cronobacter_sakazakii_696		gap_fill
Cronobacter_sakazakii_701		gap_fill	WP_004388586.1	WP_004388586.1	WP_004385734.1 or BN129_RS22110
Cronobacter_sakazakii_ATCC_BAA_894			WP_007778572.1
Cronobacter_sakazakii_E764		gap_fill	WP_007888881.1	WP_007888881.1	WP_038879120.1 or UOK_RS0106165
Cronobacter_sakazakii_ES15		gap_fill	WP_007778572.1	WP_007778572.1	ES15_RS18870 or WP_014729840.1
Cronobacter_sakazakii_ES35		gap_fill	WP_007888881.1	WP_007888881.1	UQ1_RS0120435 or WP_007892464.1
Cronobacter_sakazakii_ES713		gap_fill	WP_004388586.1	WP_004388586.1	WP_004385734.1 or GS3_RS03595
Cryocola_sp_340MFSha3_1			gap_fill			WP_018192360.1			WP_020075330.1
Cryptobacterium_curtum_DSM_15641			gap_fill
Culturomica_massiliensis_DSM_103121			gap_fill
Cuneatibacter_caecimuris_DSM_29486			gap_fill
Cupriavidus_metallidurans_CH34			WP_011517480.1	WP_011517480.1		WP_011517225.1
Curtobacterium_flaccumfaciens_MEB126			gap_fill						WP_042538427.1
Curtobacterium_flaccumfaciens_UCD_AKU			gap_fill						WP_017885896.1
Curvibacter_gracilis_ATCC_BAA_807			WP_027476465.1	WP_027476465.1		WP_027478033.1
Cutibacterium_acnes_266			gap_fill		WP_002515366.1 or PAZ_RS09645				WP_075261270.1
Cutibacterium_acnes_6609			gap_fill		WP_002523398.1 or TIB1ST10_RS09800				WP_011183816.1
Cutibacterium_acnes_ATCC_11828			gap_fill		TIIST44_RS02515 or WP_002514946.1				WP_074025688.1
Cutibacterium_acnes_C1			gap_fill		WP_002515366.1 or PAC1_RS09845				WP_011183816.1
Cutibacterium_acnes_FZ1_2_0			gap_fill		WP_002515366.1 or TIA1EST31_RS01835				gap_fill
Cutibacterium_acnes_HL001PA1			gap_fill		WP_002515366.1 or HMPREF9603_RS08515				WP_075260095.1
Cutibacterium_acnes_HL002PA1			gap_fill		HMPREF9613_RS10850 or WP_002515366.1				WP_011183816.1
Cutibacterium_acnes_HL002PA2			gap_fill		HMPREF9614_RS10910 or WP_002515366.1				WP_073842136.1
Cutibacterium_acnes_HL002PA3			gap_fill		HMPREF9615_RS00200 or WP_002515366.1				WP_073842136.1
Cutibacterium_acnes_HL005PA1			gap_fill		HMPREF9594_RS07630 or WP_002515366.1				gap_fill
Cutibacterium_acnes_HL005PA2			gap_fill		WP_002515366.1 or HMPREF9595_RS01920				WP_073842136.1
Cutibacterium_acnes_HL005PA4			gap_fill		HMPREF9597_RS10360 or WP_002515366.1				WP_011183816.1
Cutibacterium_acnes_HL007PA1			gap_fill		WP_002515366.1 or HMPREF9616_RS05440				gap_fill
Cutibacterium_acnes_HL013PA1			gap_fill		WP_002515366.1 or HMPREF9567_RS01085				WP_011183816.1
Cutibacterium_acnes_HL013PA2			gap_fill		WP_002515366.1 or HMPREF9568_RS08330				WP_073842136.1
Cutibacterium_acnes_HL020PA1			gap_fill		HMPREF9563_RS05275 or WP_002515366.1				WP_073842136.1
Cutibacterium_acnes_HL025PA1			gap_fill		WP_002515366.1 or HMPREF9587_RS06875				WP_011183816.1
Cutibacterium_acnes_HL027PA1			gap_fill		WP_002515366.1 or HMPREF9609_RS07920				WP_075260621.1
Cutibacterium_acnes_HL027PA2			gap_fill		WP_002515366.1 or HMPREF9610_RS06075				WP_073842136.1
Cutibacterium_acnes_HL030PA1			gap_fill		HMPREF9601_RS10910 or WP_002523398.1				WP_011183816.1
Cutibacterium_acnes_HL036PA1			gap_fill		WP_002515366.1 or HMPREF9604_RS06570				WP_073842136.1
Cutibacterium_acnes_HL036PA2			gap_fill		HMPREF9605_RS00195 or WP_002515366.1				WP_073842136.1
Cutibacterium_acnes_HL037PA1			gap_fill		WP_002515366.1 or HMPREF9620_RS10295				gap_fill
Cutibacterium_acnes_HL037PA2			gap_fill						WP_002526784.1
Cutibacterium_acnes_HL038PA1			gap_fill		HMPREF9583_RS11065 or WP_002515366.1				gap_fill
Cutibacterium_acnes_HL043PA1			gap_fill		WP_002515366.1 or HMPREF9570_RS04180				gap_fill
Cutibacterium_acnes_HL043PA2			gap_fill		HMPREF9571_RS00225 or WP_002515366.1				gap_fill
Cutibacterium_acnes_HL044PA1			gap_fill						WP_002526784.1
Cutibacterium_acnes_HL045PA1			gap_fill		HMPREF9566_RS06345 or WP_002515366.1				gap_fill
Cutibacterium_acnes_HL046PA1			gap_fill		HMPREF9592_RS10380 or WP_002515366.1				WP_011183816.1
Cutibacterium_acnes_HL046PA2			gap_fill		WP_002515366.1 or HMPREF9593_RS09975				WP_073842136.1
Cutibacterium_acnes_HL050PA1			gap_fill		HMPREF9598_RS09565 or WP_002515366.1				WP_011183816.1
Cutibacterium_acnes_HL050PA2			gap_fill		HMPREF9599_RS05240 or WP_002515366.1				WP_075260095.1
Cutibacterium_acnes_HL050PA3			gap_fill		WP_002515366.1 or HMPREF9600_RS07885				WP_011183816.1
Cutibacterium_acnes_HL053PA1			gap_fill		WP_002515366.1 or HMPREF9564_RS04970				gap_fill
Cutibacterium_acnes_HL053PA2			gap_fill		WP_002526387.1 or HMPREF9565_RS11015				WP_011183816.1
Cutibacterium_acnes_HL056PA1			gap_fill		WP_002515366.1 or HMPREF9617_RS03000				gap_fill
Cutibacterium_acnes_HL059PA1			gap_fill		WP_002515366.1 or HMPREF9589_RS01480				WP_011183816.1
Cutibacterium_acnes_HL059PA2			gap_fill		WP_002515366.1 or HMPREF9590_RS01260				WP_011183816.1
Cutibacterium_acnes_HL060PA1			gap_fill		HMPREF9582_RS05115 or WP_002515366.1				WP_075260095.1
Cutibacterium_acnes_HL063PA1			gap_fill		HMPREF9611_RS06035 or WP_002515366.1				WP_073842136.1
Cutibacterium_acnes_HL063PA2			gap_fill		HMPREF9612_RS08995 or WP_002515366.1				WP_011183816.1
Cutibacterium_acnes_HL067PA1			gap_fill		HMPREF9608_RS01675 or WP_002515366.1				WP_011183816.1
Cutibacterium_acnes_HL072PA1			gap_fill		WP_002515366.1 or HMPREF9572_RS08770				WP_073842136.1
Cutibacterium_acnes_HL072PA2			gap_fill		WP_002515366.1 or HMPREF9573_RS05765				WP_073842136.1
Cutibacterium_acnes_HL074PA1			gap_fill		WP_002515366.1 or HMPREF9574_RS10145				gap_fill
Cutibacterium_acnes_HL078PA1			gap_fill		HMPREF9569_RS05295 or WP_002515366.1				gap_fill
Cutibacterium_acnes_HL082PA1			gap_fill		HMPREF9618_RS04200 or WP_002526387.1				WP_011183816.1
Cutibacterium_acnes_HL082PA2			gap_fill		WP_002515366.1 or HMPREF9619_RS09625				WP_075260095.1
Cutibacterium_acnes_HL083PA1			gap_fill		WP_002515366.1 or HMPREF9585_RS05200				gap_fill
Cutibacterium_acnes_HL083PA2			gap_fill		HMPREF9586_RS00930 or WP_002515366.1				WP_011183816.1
Cutibacterium_acnes_HL086PA1			gap_fill		WP_002515366.1 or HMPREF9591_RS01310				WP_011183816.1
Cutibacterium_acnes_HL087PA2			gap_fill		WP_002515366.1 or HMPREF9580_RS00205				WP_073842136.1
Cutibacterium_acnes_HL087PA3			gap_fill		HMPREF9581_RS04665 or WP_002515366.1				WP_011183816.1
Cutibacterium_acnes_HL092PA1			gap_fill		HMPREF9584_RS02455 or WP_002526387.1				WP_011183816.1
Cutibacterium_acnes_HL096PA1			gap_fill		WP_002515366.1 or PAGK_RS09710				gap_fill
Cutibacterium_acnes_HL096PA2			gap_fill		WP_002515366.1 or HMPREF9338_RS05165				gap_fill
Cutibacterium_acnes_HL097PA1			gap_fill		WP_002523398.1 or HMPREF9344_RS05110				WP_075204478.1
Cutibacterium_acnes_HL099PA1			gap_fill		HMPREF9343_RS08540 or WP_002515366.1				gap_fill
Cutibacterium_acnes_HL103PA1			gap_fill		WP_002515366.1 or HMPREF9341_RS01105				WP_075260095.1
Cutibacterium_acnes_HL110PA1			gap_fill		WP_002526387.1 or HMPREF9575_RS08430				WP_011183816.1
Cutibacterium_acnes_HL110PA2			gap_fill		HMPREF9576_RS08110 or WP_002526387.1				WP_011183816.1
Cutibacterium_acnes_HL110PA3			gap_fill		WP_002514946.1 or HMPREF9577_RS09865				WP_075260649.1
Cutibacterium_acnes_HL110PA4			gap_fill		HMPREF9578_RS06305 or WP_002514946.1				WP_075260649.1
Cutibacterium_acnes_J139			gap_fill		WP_002514946.1 or HMPREF9206_RS00220				WP_074025688.1
Cutibacterium_acnes_J165			gap_fill		WP_002515366.1 or HMPREF9207_RS08905				WP_073842136.1
Cutibacterium_acnes_PA_12_1_L1			gap_fill						WP_073842136.1
Cutibacterium_acnes_PA_12_1_R1			gap_fill						WP_073842136.1
Cutibacterium_acnes_PA_15_2_L1			gap_fill						WP_073842136.1
Cutibacterium_acnes_PA_21_1_L1			gap_fill						WP_011183816.1
Cutibacterium_acnes_PA_30_2_L1			gap_fill						WP_011183816.1
Cutibacterium_acnes_PRP_38			gap_fill		WP_002523398.1 or TICEST70_RS09440				WP_075204478.1
Cutibacterium_acnes_SK137			gap_fill		HMPREF0675_RS09725 or WP_002515366.1				gap_fill
Cutibacterium_acnes_SK182			gap_fill		HMPREF9205_RS03780 or WP_002515366.1				gap_fill
Cutibacterium_acnes_SK187			gap_fill		WP_002518043.1 or HMPREF1034_RS03935				WP_011183816.1
Cutibacterium_acnes_TypeIA2_P_acn31			gap_fill		WP_002515366.1 or TIA2EST36_RS09600				gap_fill
Cutibacterium_acnes_TypeIA2_P_acn33			gap_fill		WP_002515366.1 or TIA2EST2_RS09590				WP_011183816.1
Cutibacterium_granulosum_TM11			gap_fill
Dakarella_massiliensis_ND3			gap_fill
Dechlorosoma_suillum_PS			WP_014235423.1	WP_014235423.1
Dehalobacterium_formicoaceticum_DMC			gap_fill
Delftia_acidovorans_CCUG_15835	WP_016454307.1		WP_016449157.1	WP_016449157.1		(WP_016452593.1 or WP_016452602.1)
Delftia_acidovorans_CCUG_274B	WP_016450074.1		WP_016449157.1	WP_016449157.1		(WP_016448994.1 or WP_016449001.1)
Delftia_acidovorans_SPH_1			WP_043783182.1			(WP_012204093.1 or WP_012204084.1)
Dermabacter_sp_HFH0086			gap_fill						WP_016664592.1
Dermacoccus_nishinomiyaensis_DSM_20448									WP_074039228.1
Dermacoccus_sp_Ellin185			gap_fill						WP_006943337.1
Desmospora_sp_8437			gap_fill			WP_009708825.1
Desulfitobacterium_hafniense_DCB_2			gap_fill
Desulfitobacterium_hafniense_DP7			gap_fill
Desulfitobacterium_hafniense_PCP_1			gap_fill
Desulfitobacterium_hafniense_Y51			gap_fill
Desulfomicrobium_orale_DSM_12838			gap_fill
Desulfovibrio_desulfuricans_subsp_aestuarii_DSM_17919_ATCC_29578			gap_fill
Desulfovibrio_desulfuricans_subsp_desulfuricans_DSM_642			gap_fill
Desulfovibrio_desulfuricans_subsp_desulfuricans_str_G20			gap_fill
Desulfovibrio_legallii_KHC7			gap_fill
Desulfovibrio_sp_6_1_46AFAA			gap_fill
Dialister_micraerophilus_DSM_19965			gap_fill
Dialister_microaerophilus_UPII_345_E			gap_fill
Dialister_pneumosintes_F0677			gap_fill
Dielma_fastidiosa_JC13			gap_fill
Dietzia_cinnamea_NBRC_102147			gap_fill						WP_061229926.1
Dietzia_cinnamea_P4									gap_fill
Dolosigranulum_pigrum_ATCC_51524			gap_fill
Dolosigranulum_pigrum_KPL1931_CDC4294_98			gap_fill
Dorea_formicigenerans_4_6_53AFAA			gap_fill
Dorea_formicigenerans_ATCC_27755			gap_fill
Dorea_sp_D27			gap_fill
Dyadobacter_beijingensis_DSM_21582			gap_fill
Dysgonomonas_mossii_DSM_22836			gap_fill
Edwardsiella_tarda_080813			WP_176564284.1	WP_176564284.1
Edwardsiella_tarda_ATCC_23685			WP_005280785.1
Edwardsiella_tarda_C07_087			WP_174776755.1	WP_174776755.1	ETAC_RS16375 or WP_012850232.1
Edwardsiella_tarda_DT		gap_fill	WP_035604179.1	WP_035604179.1	WP_005290939.1 or ETDT_RS03900
Edwardsiella_tarda_EIB202			WP_172454885.1	WP_172454885.1	ETAE_RS16030 or WP_012850232.1
Edwardsiella_tarda_FL95_01			WP_005280785.1	WP_005280785.1
Edwardsiella_tarda_NBRC_105688			WP_005280785.1	WP_005280785.1	WP_005290939.1 or ET1_RS09505
Eggerthellaceae_bacterium_AT8			gap_fill
Eggerthella_lenta_1160AFAA			gap_fill		gap_fill
Eggerthella_lenta_11C			gap_fill		gap_fill
Eggerthella_lenta_1356FAA			gap_fill		gap_fill
Eggerthella_lenta_14A			gap_fill		gap_fill
Eggerthella_lenta_16A			gap_fill		gap_fill
Eggerthella_lenta_19C			gap_fill		gap_fill
Eggerthella_lenta_22C			gap_fill		gap_fill
Eggerthella_lenta_28B			gap_fill		gap_fill
Eggerthella_lenta_326I6NA			gap_fill		gap_fill
Eggerthella_lenta_A2			gap_fill		gap_fill
Eggerthella_lenta_AB12n2			gap_fill		gap_fill
Eggerthella_lenta_AB8n2			gap_fill		gap_fill
Eggerthella_lenta_AN51LG			gap_fill		gap_fill
Eggerthella_lenta_C592			gap_fill		gap_fill
Eggerthella_lenta_CC75D52			gap_fill		gap_fill
Eggerthella_lenta_CC82BHI2			gap_fill		gap_fill
Eggerthella_lenta_CC86D54			gap_fill		gap_fill
Eggerthella_lenta_DSM_11767			gap_fill		gap_fill
Eggerthella_lenta_DSM_11863			gap_fill		gap_fill
Eggerthella_lenta_DSM_15644			gap_fill		gap_fill
Eggerthella_lenta_HGA1			gap_fill		gap_fill
Eggerthella_lenta_MR1n12			gap_fill		gap_fill
Eggerthella_lenta_RC46F			gap_fill		gap_fill
Eggerthella_lenta_Valencia			gap_fill		gap_fill
Eggerthella_lenta_W1BHI6			gap_fill		gap_fill
Eggerthella_sinensis_DSM_16107			gap_fill
Eggerthella_sp_YY7918			gap_fill
Eikenella_corrodens_ATCC_23834			WP_003822236.1
Eisenbergiella_tayi_NML110678			gap_fill
Elusimicrobium_minutum_Pei191			gap_fill
Emergencia_timonensis_DSM_101844			gap_fill
Enhydrobacter_aerosaccus_ATCC_27094			WP_085936246.1	WP_085936246.1
Enorma_massiliensis_phI			gap_fill						WP_035101375.1
Enorma_timonensis_GD5			gap_fill						WP_019238505.1
Enterobacteriaceae_bacterium_9_2_54FAA			WP_035503930.1
Enterobacter_aerogenes_EA1509E	WP_015366804.1	EAEROS_RS19475 or EAEROS_RS19835 or WP_015369126.1	WP_015368766.1	WP_015368766.1	WP_026612186.1 or EAEROS_RS18880			gap_fill
Enterobacter_aerogenes_FGI35	WP_020078963.1	gap_fill	WP_015368766.1	WP_015368766.1	WP_026612186.1 or ENTAE_RS0100275			gap_fill
Enterobacter_aerogenes_KCTC_2190			WP_015704039.1
Enterobacter_asburiae_L1			WP_029741974.1	WP_029741974.1
Enterobacter_cancerogenus_ATCC_35316			WP_006177486.1
Enterobacter_cloacae_GGT036			WP_013095050.1	WP_013095050.1
Enterobacter_cloacae_subsp_cloacae_ATCC_13047		gap_fill	WP_013095050.1	WP_013095050.1	gap_fill
Enterobacter_cloacae_subsp_dissolvens_SDM		gap_fill	WP_014830279.1	WP_014830279.1	A3UG_RS22800 or WP_014833756.1
Enterobacter_hormaechei_ATCC_49162		gap_fill	WP_006810490.1	WP_006810490.1	WP_006808667.1 or BH712_RS15255
Enterobacter_hormaechei_FDAARGOS_68			WP_015570176.1	WP_015570176.1
Enterobacter_hormaechei_YT2			WP_015570176.1
Enterobacter_hormaechei_YT3			WP_015570176.1
Enterobacter_lignolyticus_G5			WP_013368077.1	WP_013368077.1
Enterobacter_lignolyticus_SCF1			WP_013368077.1	WP_013368077.1
Enterobacter_ludwigii_UW5			WP_047954916.1	WP_047954916.1
Enterobacter_mori_LMG_25706			gap_fill
Enterobacter_roggenkampii_35734			WP_044597324.1	WP_044597324.1
Enterobacter_sp_MGH_8			WP_022646737.1	WP_022646737.1
Enterobacter_timonensis_DSM_101775			WP_061706856.1	WP_061706856.1
Enterococcus_caccae_ATCC_BAA_1240			gap_fill
Enterococcus_casseliflavus_ATCC_12755			gap_fill
Enterococcus_casseliflavus_EC10		ECAG_RS09385 or ECAG_RS13940 or WP_005227470.1 or ECAG_RS05950			WP_005226546.1 or WP_005230333.1 or ECAG_RS15495
Enterococcus_casseliflavus_EC20		ECBG_RS0109865 or WP_005227470.1 or ECBG_RS0114370 or ECBG_RS0105180			WP_005226546.1 or ECBG_RS0111330 or WP_015510612.1
Enterococcus_durans_IPLA_655					H318_RS16595 or WP_005875224.1
Enterococcus_faecalis_12030			gap_fill
Enterococcus_faecalis_12107			gap_fill
Enterococcus_faecalis_1448E03			gap_fill
Enterococcus_faecalis_182970			gap_fill
Enterococcus_faecalis_19116			gap_fill
Enterococcus_faecalis_2630V05			gap_fill
Enterococcus_faecalis_2924			gap_fill
Enterococcus_faecalis_5952			gap_fill
Enterococcus_faecalis_599			gap_fill		WP_002415402.1 or HMPREF1327_RS10785
Enterococcus_faecalis_599951			gap_fill
Enterococcus_faecalis_7330082_2			gap_fill
Enterococcus_faecalis_7330112_3			gap_fill
Enterococcus_faecalis_7330245_2			gap_fill
Enterococcus_faecalis_7330257_1			gap_fill
Enterococcus_faecalis_7330259_5			gap_fill
Enterococcus_faecalis_7330948_5			gap_fill
Enterococcus_faecalis_7430275_3			gap_fill
Enterococcus_faecalis_7430315_3			gap_fill
Enterococcus_faecalis_7430416_3			gap_fill
Enterococcus_faecalis_7430821_4			gap_fill
Enterococcus_faecalis_79_3			gap_fill
Enterococcus_faecalis_AR01_DG			gap_fill
Enterococcus_faecalis_ATCC_10100			gap_fill		WOW_RS17845 or WP_002358958.1
Enterococcus_faecalis_ATCC_19433			gap_fill		WMC_RS17460 or WP_002358958.1
Enterococcus_faecalis_ATCC_27275			gap_fill		WP_002358958.1 or UO9_RS17765
Enterococcus_faecalis_ATCC_27959			gap_fill		UOA_RS16080 or WP_002358958.1
Enterococcus_faecalis_ATCC_29200			gap_fill		UMK_RS17970 or WP_002358958.1
Enterococcus_faecalis_ATCC_29212			gap_fill		BQ6123_RS13820 or WP_075578799.1
Enterococcus_faecalis_ATCC_35038			gap_fill		WP_002398519.1 or WMK_RS17605
Enterococcus_faecalis_ATCC_4200			gap_fill		EFDG_RS12470 or WP_002413302.1
Enterococcus_faecalis_ATCC_6055			gap_fill		WP_002358958.1 or WP_002384337.1 or WOU_RS19200
Enterococcus_faecalis_A_2_1			gap_fill
Enterococcus_faecalis_A_3_1			gap_fill
Enterococcus_faecalis_B1005			gap_fill
Enterococcus_faecalis_B1138			gap_fill
Enterococcus_faecalis_B1249			gap_fill
Enterococcus_faecalis_B1290			gap_fill
Enterococcus_faecalis_B1327			gap_fill
Enterococcus_faecalis_B1376			gap_fill
Enterococcus_faecalis_B1385			gap_fill
Enterococcus_faecalis_B1441			gap_fill
Enterococcus_faecalis_B1505			gap_fill
Enterococcus_faecalis_B1532			gap_fill
Enterococcus_faecalis_B15725			gap_fill
Enterococcus_faecalis_B1586			gap_fill
Enterococcus_faecalis_B1618			gap_fill
Enterococcus_faecalis_B1623			gap_fill
Enterococcus_faecalis_B16457			gap_fill
Enterococcus_faecalis_B1696			gap_fill
Enterococcus_faecalis_B1719			gap_fill
Enterococcus_faecalis_B1734			gap_fill
Enterococcus_faecalis_B1843			gap_fill
Enterococcus_faecalis_B1851			gap_fill
Enterococcus_faecalis_B1874			gap_fill
Enterococcus_faecalis_B1921			gap_fill
Enterococcus_faecalis_B1933			gap_fill
Enterococcus_faecalis_B2202			gap_fill
Enterococcus_faecalis_B2207			gap_fill
Enterococcus_faecalis_B2211			gap_fill
Enterococcus_faecalis_B2255			gap_fill
Enterococcus_faecalis_B2277			gap_fill
Enterococcus_faecalis_B2391			gap_fill
Enterococcus_faecalis_B2488			gap_fill
Enterococcus_faecalis_B2535			gap_fill
Enterococcus_faecalis_B2557			gap_fill
Enterococcus_faecalis_B2593			gap_fill
Enterococcus_faecalis_B2670			gap_fill
Enterococcus_faecalis_B2685			gap_fill
Enterococcus_faecalis_B2687			gap_fill
Enterococcus_faecalis_B2802			gap_fill
Enterococcus_faecalis_B2864			gap_fill
Enterococcus_faecalis_B2867			gap_fill
Enterococcus_faecalis_B2949			gap_fill
Enterococcus_faecalis_B3031			gap_fill
Enterococcus_faecalis_B3042			gap_fill
Enterococcus_faecalis_B3053			gap_fill
Enterococcus_faecalis_B3119			gap_fill
Enterococcus_faecalis_B3126			gap_fill
Enterococcus_faecalis_B3196			gap_fill
Enterococcus_faecalis_B3286			gap_fill
Enterococcus_faecalis_B3336			gap_fill
Enterococcus_faecalis_B4008			gap_fill
Enterococcus_faecalis_B4018			gap_fill
Enterococcus_faecalis_B4148			gap_fill
Enterococcus_faecalis_B4163			gap_fill
Enterococcus_faecalis_B4259			gap_fill
Enterococcus_faecalis_B4267			gap_fill
Enterococcus_faecalis_B4270			gap_fill
Enterococcus_faecalis_B4411			gap_fill
Enterococcus_faecalis_B4568			gap_fill
Enterococcus_faecalis_B4638			gap_fill
Enterococcus_faecalis_B4672			gap_fill
Enterococcus_faecalis_B4674			gap_fill
Enterococcus_faecalis_B4969			gap_fill
Enterococcus_faecalis_B5035			gap_fill
Enterococcus_faecalis_B5076			gap_fill
Enterococcus_faecalis_B56765			gap_fill
Enterococcus_faecalis_B594			gap_fill
Enterococcus_faecalis_B653			gap_fill
Enterococcus_faecalis_B69486			gap_fill
Enterococcus_faecalis_B84847			gap_fill
Enterococcus_faecalis_B878			gap_fill
Enterococcus_faecalis_B939			gap_fill
Enterococcus_faecalis_B_4_111			gap_fill
Enterococcus_faecalis_C19315WT			gap_fill
Enterococcus_faecalis_CH116			gap_fill
Enterococcus_faecalis_CH136			gap_fill
Enterococcus_faecalis_CH188			gap_fill		WP_002358958.1 or EFNG_RS19585
Enterococcus_faecalis_CH19			gap_fill
Enterococcus_faecalis_CH570			gap_fill
Enterococcus_faecalis_Com1			gap_fill
Enterococcus_faecalis_Com7			gap_fill
Enterococcus_faecalis_Com_2			gap_fill
Enterococcus_faecalis_Com_6			gap_fill
Enterococcus_faecalis_D1			gap_fill
Enterococcus_faecalis_D173			gap_fill
Enterococcus_faecalis_D3			gap_fill
Enterococcus_faecalis_D32			gap_fill		WP_002358958.1 or EFD32_RS14485
Enterococcus_faecalis_D6			gap_fill		EFLG_RS18585 or WP_002358958.1
Enterococcus_faecalis_DAPTO_512			gap_fill		HMPREF9492_RS08030 or WP_002368512.1
Enterococcus_faecalis_DAPTO_516			gap_fill		HMPREF9493_RS12435 or WP_002368512.1
Enterococcus_faecalis_DS16			gap_fill
Enterococcus_faecalis_DS5			gap_fill		EFEG_RS16925 or WP_002358958.1
Enterococcus_faecalis_E1			gap_fill
Enterococcus_faecalis_E1Sol			gap_fill		WP_002372607.1 or EFJG_RS06570
Enterococcus_faecalis_E99			gap_fill
Enterococcus_faecalis_EnGen0253			gap_fill		U9C_RS19645 or WP_002358958.1
Enterococcus_faecalis_ERV103			gap_fill		HMPREF1328_RS10765 or WP_002383158.1
Enterococcus_faecalis_ERV116			gap_fill		WP_002383158.1 or HMPREF1329_RS11915
Enterococcus_faecalis_ERV129			gap_fill		HMPREF1330_RS05810 or WP_002383158.1
Enterococcus_faecalis_ERV25			gap_fill		WP_002383158.1 or HMPREF1331_RS17160
Enterococcus_faecalis_ERV31			gap_fill		HMPREF1332_RS07980 or WP_002383158.1
Enterococcus_faecalis_ERV37			gap_fill		WP_002383158.1 or HMPREF1333_RS14245
Enterococcus_faecalis_ERV41			gap_fill		WP_002383158.1 or HMPREF1334_RS14455
Enterococcus_faecalis_ERV62			gap_fill		WP_002383158.1 or HMPREF1335_RS13475
Enterococcus_faecalis_ERV63			gap_fill		WP_002383158.1 or HMPREF1336_RS14950
Enterococcus_faecalis_ERV65			gap_fill		HMPREF1337_RS14375 or WP_002383158.1
Enterococcus_faecalis_ERV68			gap_fill		HMPREF1338_RS13500 or WP_002383158.1
Enterococcus_faecalis_ERV72			gap_fill		WP_002383158.1 or HMPREF1339_RS16190
Enterococcus_faecalis_ERV81			gap_fill		WP_002383158.1 or HMPREF1341_RS11305
Enterococcus_faecalis_ERV85			gap_fill		HMPREF1342_RS16775 or WP_002383158.1
Enterococcus_faecalis_ERV93			gap_fill		WP_002383158.1 or HMPREF1343_RS15095
Enterococcus_faecalis_F1			gap_fill
Enterococcus_faecalis_FA2_2			gap_fill
Enterococcus_faecalis_Fly1			gap_fill		WP_002375440.1 or EFKG_RS04320
Enterococcus_faecalis_Fly_2			gap_fill
Enterococcus_faecalis_HEF39			gap_fill
Enterococcus_faecalis_HH22			gap_fill
Enterococcus_faecalis_HIP11704			gap_fill		EFHG_RS09040 or WP_002358958.1
Enterococcus_faecalis_JH1			gap_fill		EFIG_RS10275 or WP_002358958.1
Enterococcus_faecalis_KB1			gap_fill
Enterococcus_faecalis_M7			gap_fill		EFM7_RS15945 or WP_002413302.1
Enterococcus_faecalis_Merz151			gap_fill
Enterococcus_faecalis_Merz192			gap_fill
Enterococcus_faecalis_Merz204			gap_fill
Enterococcus_faecalis_Merz89			gap_fill
Enterococcus_faecalis_Merz96			gap_fill		WP_002368512.1 or EFGG_RS11720
Enterococcus_faecalis_MMH594			gap_fill		gap_fill
Enterococcus_faecalis_Ned10			gap_fill
Enterococcus_faecalis_OG1X			gap_fill		WP_002413302.1 or OG1X_RS04105
Enterococcus_faecalis_Pan7			gap_fill
Enterococcus_faecalis_PC1_1			gap_fill		CUI_RS11665 or WP_002358958.1
Enterococcus_faecalis_R508			gap_fill		WP_002383158.1 or HMPREF1344_RS10755 or WP_002419707.1
Enterococcus_faecalis_R712			gap_fill		HMPREF9377_RS14715 or WP_002368512.1
Enterococcus_faecalis_RC73			gap_fill
Enterococcus_faecalis_RM3817			gap_fill
Enterococcus_faecalis_RM4679			gap_fill
Enterococcus_faecalis_RMC1			gap_fill
Enterococcus_faecalis_RMC5			gap_fill
Enterococcus_faecalis_RMC65			gap_fill
Enterococcus_faecalis_S613			gap_fill		WP_002368512.1 or HMPREF9376_RS18690
Enterococcus_faecalis_SF100			gap_fill
Enterococcus_faecalis_SF105			gap_fill
Enterococcus_faecalis_SF1592			gap_fill
Enterococcus_faecalis_SF19			gap_fill
Enterococcus_faecalis_SF21520			gap_fill
Enterococcus_faecalis_SF21521			gap_fill
Enterococcus_faecalis_SF24396			gap_fill
Enterococcus_faecalis_SF24397			gap_fill
Enterococcus_faecalis_SF24413			gap_fill
Enterococcus_faecalis_SF26630			gap_fill
Enterococcus_faecalis_SF28073			gap_fill
Enterococcus_faecalis_SF339			gap_fill
Enterococcus_faecalis_SF350			gap_fill
Enterococcus_faecalis_SF370			gap_fill
Enterococcus_faecalis_SF5039			gap_fill
Enterococcus_faecalis_SF6375			gap_fill
Enterococcus_faecalis_SS_6			gap_fill
Enterococcus_faecalis_SS_7			gap_fill
Enterococcus_faecalis_str_C_19315_led_1b_pp_SCV			gap_fill
Enterococcus_faecalis_str_Symbioflor_1			gap_fill		WP_002358958.1 or EFS1_RS13640
Enterococcus_faecalis_T1			gap_fill		WP_002354752.1 or EFAG_RS05815 or WP_025186103.1
Enterococcus_faecalis_T10			gap_fill
Enterococcus_faecalis_T11			gap_fill		WP_002379018.1 or EFMG_RS05180
Enterococcus_faecalis_T12			gap_fill
Enterococcus_faecalis_T13			gap_fill
Enterococcus_faecalis_T14			gap_fill
Enterococcus_faecalis_T16			gap_fill
Enterococcus_faecalis_T17			gap_fill
Enterococcus_faecalis_T18			gap_fill
Enterococcus_faecalis_T19			gap_fill
Enterococcus_faecalis_T2			gap_fill		EFBG_RS12210 or WP_002358958.1
Enterococcus_faecalis_T20			gap_fill
Enterococcus_faecalis_T21			gap_fill
Enterococcus_faecalis_T3			gap_fill		EFCG_RS05750 or WP_002360927.1
Enterococcus_faecalis_T4			gap_fill
Enterococcus_faecalis_T5			gap_fill
Enterococcus_faecalis_T6			gap_fill
Enterococcus_faecalis_T7			gap_fill
Enterococcus_faecalis_T8			gap_fill		EFYG_RS17350 or WP_002388638.1
Enterococcus_faecalis_T9			gap_fill
Enterococcus_faecalis_TR161			gap_fill
Enterococcus_faecalis_TR197			gap_fill
Enterococcus_faecalis_TUSoD_Ef11			gap_fill		WP_002358958.1 or HMPREF0347_RS18585 or WP_002389242.1
Enterococcus_faecalis_TX0012			gap_fill		WP_002408401.1 or HMPREF9499_RS08020
Enterococcus_faecalis_TX0017			gap_fill		HMPREF9500_RS09075 or WP_002358958.1 or WP_002384337.1
Enterococcus_faecalis_TX0027			gap_fill		HMPREF9501_RS13390 or WP_002358958.1
Enterococcus_faecalis_TX0031			gap_fill		WP_002354752.1 or HMPREF9502_RS12330
Enterococcus_faecalis_TX0043			gap_fill		HMPREF9503_RS17065 or WP_002354752.1
Enterococcus_faecalis_TX0102			gap_fill		HMPREF9504_RS17070 or WP_002354752.1
Enterococcus_faecalis_TX0109			gap_fill		WP_002398519.1 or HMPREF9505_RS10660
Enterococcus_faecalis_TX0309A			gap_fill		HMPREF9506_RS14460 or WP_002387262.1
Enterococcus_faecalis_TX0309B			gap_fill		WP_002387262.1 or HMPREF9507_RS12535
Enterococcus_faecalis_TX0312			gap_fill		WP_002354752.1 or HMPREF9508_RS09130
Enterococcus_faecalis_TX0411			gap_fill		HMPREF9509_RS16170 or WP_002388638.1
Enterococcus_faecalis_TX0470			gap_fill		HMPREF9510_RS05935 or WP_002358958.1
Enterococcus_faecalis_TX0630			gap_fill		HMPREF9511_RS19945 or WP_002358958.1
Enterococcus_faecalis_TX0635_WH245			gap_fill
Enterococcus_faecalis_TX0645			gap_fill		HMPREF9513_RS09565 or WP_002358958.1 or WP_002409791.1
Enterococcus_faecalis_TX0855			gap_fill		WP_002358958.1 or HMPREF9514_RS10105
Enterococcus_faecalis_TX0860			gap_fill		HMPREF9515_RS13820 or WP_002358958.1
Enterococcus_faecalis_TX1302			gap_fill
Enterococcus_faecalis_TX1341			gap_fill		WP_002358958.1 or HMPREF9517_RS14815
Enterococcus_faecalis_TX1342			gap_fill
Enterococcus_faecalis_TX1346			gap_fill		WP_002396029.1 or HMPREF9519_RS13680 or WP_002395789.1
Enterococcus_faecalis_TX2137			gap_fill		HMPREF9494_RS13675 or WP_002358958.1
Enterococcus_faecalis_TX2141			gap_fill		WP_002358958.1 or HMPREF9495_RS13730
Enterococcus_faecalis_TX4000			gap_fill		WP_002388638.1 or HMPREF9496_RS15045
Enterococcus_faecalis_TX4244			gap_fill		HMPREF9497_RS13340 or WP_002394619.1
Enterococcus_faecalis_TX4248			gap_fill		HMPREF9498_RS13940 or WP_002358958.1
Enterococcus_faecalis_UAA1014			gap_fill
Enterococcus_faecalis_UAA1180			gap_fill
Enterococcus_faecalis_UAA1489			gap_fill
Enterococcus_faecalis_UAA409			gap_fill
Enterococcus_faecalis_UAA702			gap_fill
Enterococcus_faecalis_UAA769			gap_fill
Enterococcus_faecalis_UAA823			gap_fill
Enterococcus_faecalis_UAA902			gap_fill
Enterococcus_faecalis_UAA903			gap_fill
Enterococcus_faecalis_UAA904			gap_fill
Enterococcus_faecalis_UAA905			gap_fill
Enterococcus_faecalis_UAA906			gap_fill
Enterococcus_faecalis_UAA907			gap_fill
Enterococcus_faecalis_UAA943			gap_fill
Enterococcus_faecalis_UAA948			gap_fill
Enterococcus_faecalis_V587			gap_fill
Enterococcus_faecalis_WH257			gap_fill
Enterococcus_faecalis_WH571			gap_fill
Enterococcus_faecalis_X98			gap_fill		EFOG_RS04285 or WP_002354752.1
Enterococcus_faecalis_YI6_1			gap_fill
Enterococcus_faecium_1141733		gap_fill			WP_002310578.1 or EFSG_RS17490
Enterococcus_faecium_1230933		WP_002303716.1 or EFPG_RS00090			WP_002304806.1 or EFPG_RS12310
Enterococcus_faecium_1231408		EFUG_RS06780 or WP_002303716.1			WP_002289029.1 or EFUG_RS15885
Enterococcus_faecium_1231410		EFTG_RS09845 or WP_002303716.1			EFTG_RS18705 or WP_002289029.1
Enterococcus_faecium_1231501		WP_002307044.1 or EFRG_RS12225			EFRG_RS17875 or WP_002289029.1
Enterococcus_faecium_1231502		WP_002303716.1 or EFQG_RS08605			WP_002289029.1 or EFQG_RS14050
Enterococcus_faecium_504		WP_025478192.1 or HMPREF1347_RS07395			WP_002289029.1 or HMPREF1347_RS11790
Enterococcus_faecium_505		gap_fill			WP_002289029.1 or HMPREF1348_RS15545
Enterococcus_faecium_ATCC_8459		WP_010738748.1 or I581_RS12985			WP_002289029.1 or I581_RS06270
Enterococcus_faecium_C309		Y51_RS0106200 or WP_002303716.1			Y51_RS0100855 or WP_002289029.1
Enterococcus_faecium_C68		EFXG_RS08735 or WP_002303716.1			WP_002289029.1 or EFXG_RS00950
Enterococcus_faecium_Com12		gap_fill			WP_002314264.1 or EFVG_RS15620
Enterococcus_faecium_Com15					WP_002315803.1 or EFWG_RS15565
Enterococcus_faecium_D344SRF		EDAG_RS19175 or WP_002341504.1 or EDAG_RS19170			WP_002289029.1 or EDAG_RS19825
Enterococcus_faecium_DO			gap_fill
Enterococcus_faecium_E0333			gap_fill
Enterococcus_faecium_E1039		EFME1039_RS09380 or WP_025477802.1
Enterococcus_faecium_E1071		WP_025477606.1 or EFME1071_RS12950			EFME1071_RS09965 or WP_002289029.1
Enterococcus_faecium_E1162		EFME1162_RS21180 or WP_002303716.1			WP_002289029.1 or EFME1162_RS21930
Enterococcus_faecium_E1622			gap_fill
Enterococcus_faecium_E1636		EFME1636_RS11310 or WP_002341504.1 or EFME1636_RS11305			WP_002289029.1 or EFME1636_RS09245
Enterococcus_faecium_E980		gap_fill			WP_002329784.1 or EFME980_RS15580
Enterococcus_faecium_EnGen0305		UK3_RS07960 or UK3_RS07955 or WP_002341504.1			UK3_RS13660 or WP_002289029.1
Enterococcus_faecium_EnGen0308					UK5_RS14430 or WP_002328810.1
Enterococcus_faecium_EnGen0312		UKQ_RS19160 or WP_002303716.1			WP_002304806.1 or UKQ_RS12970
Enterococcus_faecium_EnGen0314		UKE_RS15050 or WP_002303716.1			WP_002304806.1 or UKE_RS08600
Enterococcus_faecium_EnGen0316		WP_002303716.1 or UKG_RS18300			UKG_RS10065 or WP_002304806.1
Enterococcus_faecium_EnGen0318		WP_002303716.1 or UKI_RS18745			UKI_RS12215 or WP_002304806.1
Enterococcus_faecium_EnGen0319		WP_002303716.1 or UKK_RS18680			UKK_RS12590 or WP_002304806.1
Enterococcus_faecium_EnGen0321		UKM_RS18285 or WP_002303716.1			WP_002304806.1 or UKM_RS11965
Enterococcus_faecium_EnGen0323		UKO_RS19100 or WP_002303716.1			WP_002304806.1 or UKO_RS12795
Enterococcus_faecium_EnGen0375		I575_RS12850 or WP_002303716.1			WP_002304806.1 or I575_RS07635
Enterococcus_faecium_EnGen0376		I576_RS14400 or WP_002303716.1			I576_RS09545 or WP_002304806.1
Enterococcus_faecium_EnGen0377		WP_002303716.1 or I577_RS10610			I577_RS08525 or WP_002304806.1
Enterococcus_faecium_ERV1		WP_002303716.1 or HMPREF1361_RS09340			HMPREF1361_RS13470 or WP_002289029.1
Enterococcus_faecium_LCT_EF128		Y7G_RS0108510 or WP_002307044.1			WP_002289029.1 or Y7G_RS0112170
Enterococcus_faecium_LCT_EF20		gap_fill			WP_002329784.1 or D448_RS0110055
Enterococcus_faecium_LCT_EF258		gap_fill			WP_002329784.1 or D449_RS0108660
Enterococcus_faecium_LCT_EF90		gap_fill			W75_RS0105760 or WP_002329784.1
Enterococcus_faecium_PC4_1		gap_fill			WP_002314264.1 or CUO_RS13385
Enterococcus_faecium_TC_6		EFZG_RS11960 or EFZG_RS11965 or WP_002341504.1			WP_002289029.1 or EFZG_RS18695
Enterococcus_faecium_TX0082		WP_002303716.1 or HMPREF9522_RS16410			HMPREF9522_RS13505 or WP_002289029.1
Enterococcus_faecium_TX0133A		HMPREF9523_RS05160 or WP_002321324.1			WP_002289029.1 or HMPREF9523_RS11805
Enterococcus_faecium_TX0133a04		WP_002321324.1 or HMPREF9525_RS08440			HMPREF9525_RS13935 or WP_002321664.1
Enterococcus_faecium_TX0133B		HMPREF9526_RS06090 or WP_002321324.1			HMPREF9526_RS06140 or WP_002289029.1
Enterococcus_faecium_TX0133C		WP_002321324.1 or HMPREF9527_RS00485			HMPREF9527_RS07755 or WP_002289029.1
Enterococcus_faecium_U0317		WP_002303716.1 or EFMU0317_RS15810			EFMU0317_RS13405 or WP_002289029.1
Enterococcus_faecium_UC7251		L234_RS02840 or WP_002303716.1			L234_RS08865 or WP_002289029.1
Enterococcus_gallinarum_EG2			gap_fill
Enterococcus_hirae_ATCC_9790			gap_fill
Enterococcus_massiliensis_DSM_100308			gap_fill
Enterococcus_mundtii_ATCC_882			gap_fill
Enterococcus_mundtii_crl1656			gap_fill
Enterococcus_mundtii_CRL35			gap_fill
Enterococcus_mundtii_QU_25			gap_fill
Enterococcus_pallens_ATCC_BAA_351			gap_fill
Enterococcus_pallens_DSM_15690			gap_fill
Enterococcus_raffinosus_ATCC_49464			gap_fill
Enterococcus_raffinosus_DSM_5633			gap_fill
Enterococcus_raffinosus_NBRC_100492			gap_fill
Enterococcus_saccharolyticus_30_1		gap_fill			WP_005469776.1 or WP_003129007.1 or HMPREF9478_RS00295
Enterococcus_saccharolyticus_ATCC_43076		gap_fill			I572_RS02320 or WP_016173897.1 or WP_016176175.1
Enterococcus_saccharolyticus_DSM8903			gap_fill
Enterococcus_sp_GMD2E			gap_fill
Enterococcus_sp_GMD3E			gap_fill
Enterococcus_sp_GMD4E			gap_fill
Enterococcus_sp_GMD5E			gap_fill
Enterorhabdus_caecimuris_B7			gap_fill
Enterorhabdus_mucosicola_DSM_19490			gap_fill
Eremococcus_coleocola_ACS_139_V_Col8			gap_fill
Erwinia_psidii_IBSBF_435			WP_124234761.1	WP_124234761.1		WP_233592584.1
Erwinia_rhapontici_BIGb0435			WP_192933176.1	WP_192933176.1
Erysipelothrix_rhusiopathiae_ATCC_19414			gap_fill
Erysipelothrix_rhusiopathiae_str_Fujisawa			gap_fill
Erysipelothrix_rhusiopathiae_SY1027			gap_fill
Erysipelotrichaceae_bacterium_21_3			gap_fill
Erysipelotrichaceae_bacterium_2_2_44A			gap_fill
Erysipelotrichaceae_bacterium_6_1_45			gap_fill
Erysipelotrichaceae_bacterium_I46			gap_fill
Escherichia_albertii_EC06_170			WP_025237885.1	WP_025237885.1
Escherichia_albertii_KF1			WP_025237885.1
Escherichia_albertii_TW07627			WP_000455238.1
Escherichia_albertii_TW11588			WP_000455237.1	WP_000455237.1
Escherichia_coli_042		gap_fill	WP_000455228.1	WP_000455228.1	gap_fill
Escherichia_coli_07798			WP_000455233.1	WP_000455233.1	WP_001305044.1 or BE42_RS02290
Escherichia_coli_09BKT078844		gap_fill	WP_000455227.1	WP_000455227.1	gap_fill
Escherichia_coli_0_1288		gap_fill	WP_000455228.1	WP_000455228.1	gap_fill
Escherichia_coli_0_1304		gap_fill	WP_000455227.1	WP_000455227.1	gap_fill
Escherichia_coli_101_1		gap_fill	WP_000455227.1	WP_000455227.1	EC1011_RS14670 or WP_024166449.1
Escherichia_coli_10_0821		gap_fill	WP_000455227.1	WP_000455227.1	gap_fill
Escherichia_coli_10_0833		gap_fill	WP_000455227.1	WP_000455227.1	gap_fill
Escherichia_coli_10_0869		gap_fill	WP_000455227.1	WP_000455227.1	gap_fill
Escherichia_coli_1357			WP_000455228.1	WP_000455228.1
Escherichia_coli_174750		gap_fill	WP_000455227.1	WP_000455227.1	gap_fill
Escherichia_coli_174900			WP_000455228.1	WP_000455228.1	gap_fill
Escherichia_coli_178900			WP_000455227.1	WP_000455227.1	WP_001384974.1 or EC178900_RS23505
Escherichia_coli_179100			WP_000455228.1	WP_000455228.1	gap_fill
Escherichia_coli_179550			WP_001388762.1	WP_001388762.1	gap_fill
Escherichia_coli_180050		gap_fill	WP_000455227.1	WP_000455227.1	gap_fill
Escherichia_coli_180200			WP_000455228.1	WP_000455228.1	gap_fill
Escherichia_coli_180600		gap_fill	WP_000455228.1	WP_000455228.1	gap_fill
Escherichia_coli_1827_70		gap_fill	gap_fill	EC182770_RS24300 or WP_001339143.1 or EC182770_RS24295	gap_fill
Escherichia_coli_199900_1		gap_fill	WP_000455228.1	WP_000455228.1	gap_fill
Escherichia_coli_1_2264			WP_000455227.1	WP_000455227.1	gap_fill
Escherichia_coli_1_2741		gap_fill	WP_000455230.1	WP_000455230.1	gap_fill
Escherichia_coli_201600_1			WP_000455227.1	WP_000455227.1	gap_fill
Escherichia_coli_2362_75			WP_000455227.1	WP_000455227.1	WP_001305044.1 or EC236275_RS00930
Escherichia_coli_2534_86		gap_fill	WP_000455228.1	WP_000455228.1	gap_fill
Escherichia_coli_2719100			WP_000455227.1	WP_000455227.1	gap_fill
Escherichia_coli_2720900			WP_001697342.1	WP_001697342.1	gap_fill
Escherichia_coli_2722950			WP_000455227.1	WP_000455227.1	WP_001417134.1 or EC2722950_RS22575
Escherichia_coli_2726800			WP_000455228.1	WP_000455228.1	gap_fill
Escherichia_coli_2726950			WP_000455227.1	WP_000455227.1	gap_fill
Escherichia_coli_2729250			WP_000455227.1	WP_000455227.1	gap_fill
Escherichia_coli_2730350			WP_000455228.1	WP_000455228.1	gap_fill
Escherichia_coli_2730450		gap_fill	WP_000455227.1	WP_000455227.1	WP_001395129.1 or EC2730450_RS23070
Escherichia_coli_2731150		gap_fill	WP_000455227.1	WP_000455227.1	EC2731150_RS24300 or WP_001735948.1
Escherichia_coli_2733950		gap_fill	WP_000455227.1	WP_000455227.1	gap_fill
Escherichia_coli_2735000			WP_000455228.1	WP_000455228.1	gap_fill
Escherichia_coli_2741950		gap_fill	WP_000455227.1	WP_000455227.1	WP_001398099.1 or EC2741950_RS22960
Escherichia_coli_2747800			WP_001428638.1	WP_001428638.1	EC2747800_RS21675 or WP_001467744.1
Escherichia_coli_2749250			WP_000455227.1	WP_000455227.1	WP_001731671.1 or EC2749250_RS03935
Escherichia_coli_2756500			WP_001388762.1	WP_001388762.1	gap_fill
Escherichia_coli_2762100		gap_fill	WP_005766085.1	WP_005766085.1	gap_fill
Escherichia_coli_2770900			WP_000455227.1	WP_000455227.1	gap_fill
Escherichia_coli_2780750			WP_000455228.1	WP_000455228.1	WP_001725150.1 or EC2780750_RS21545
Escherichia_coli_2785200			WP_000455227.1	WP_000455227.1	EC2785200_RS23130 or WP_001665885.1
Escherichia_coli_2788150			WP_000455228.1	WP_000455228.1	gap_fill
Escherichia_coli_2845350		gap_fill	WP_000455227.1	WP_000455227.1	gap_fill
Escherichia_coli_2845650		gap_fill	WP_001719283.1	WP_001719283.1	gap_fill
Escherichia_coli_2846750		gap_fill	WP_000455227.1	WP_000455227.1	gap_fill
Escherichia_coli_2848050			WP_000455228.1	WP_000455228.1	gap_fill
Escherichia_coli_2850400			WP_001388762.1	WP_001388762.1	gap_fill
Escherichia_coli_2850750			WP_001388762.1	WP_001388762.1	gap_fill
Escherichia_coli_2851500			WP_000455228.1	WP_000455228.1	gap_fill
Escherichia_coli_2853500			WP_001388762.1	WP_001388762.1	gap_fill
Escherichia_coli_2854350			WP_000455228.1	WP_000455228.1	gap_fill
Escherichia_coli_2860050			WP_000455227.1	WP_000455227.1	gap_fill
Escherichia_coli_2860650			WP_000455227.1	WP_000455227.1	gap_fill
Escherichia_coli_2861200		gap_fill	WP_000455227.1	WP_000455227.1	EC2861200_RS23600 or WP_001411965.1
Escherichia_coli_2862600		gap_fill	WP_000455227.1	WP_000455227.1	gap_fill
Escherichia_coli_2864350			WP_000455228.1	WP_000455228.1	gap_fill
Escherichia_coli_2865200			WP_000455228.1	WP_000455228.1	gap_fill
Escherichia_coli_2866350			WP_000455227.1	WP_000455227.1	gap_fill
Escherichia_coli_2866450			WP_001388762.1	WP_001388762.1	gap_fill
Escherichia_coli_2866550			WP_001388762.1	WP_001388762.1	gap_fill
Escherichia_coli_2866750			WP_001388762.1	WP_001388762.1	gap_fill
Escherichia_coli_2867750			WP_001388762.1	WP_001388762.1	EC2867750_RS22795 or WP_001364848.1
Escherichia_coli_2871950		gap_fill	WP_000455227.1	WP_000455227.1	gap_fill
Escherichia_coli_2872000		gap_fill	WP_000455227.1	WP_000455227.1	gap_fill
Escherichia_coli_2872800			WP_001388762.1	WP_001388762.1	gap_fill
Escherichia_coli_2875000			WP_001388762.1	WP_001388762.1	EC2875000_RS02450 or WP_001417134.1
Escherichia_coli_2875150		gap_fill	WP_000455227.1	WP_000455227.1	gap_fill
Escherichia_coli_2_3916			WP_000455227.1	WP_000455227.1	gap_fill
Escherichia_coli_2_4168			WP_000455227.1	WP_000455227.1	gap_fill
Escherichia_coli_3003			WP_000455227.1	WP_000455227.1	EC3003_RS20315 or WP_001305044.1
Escherichia_coli_3006		gap_fill	WP_000455223.1	WP_000455223.1	gap_fill
Escherichia_coli_3431			WP_000455227.1	WP_000455227.1	gap_fill
Escherichia_coli_3_2303			WP_000455227.1	WP_000455227.1	gap_fill
Escherichia_coli_3_2608			WP_000455228.1	WP_000455228.1	gap_fill
Escherichia_coli_3_3884			WP_000455228.1	WP_000455228.1	gap_fill
Escherichia_coli_3_4870		gap_fill	WP_000455227.1	WP_000455227.1	gap_fill
Escherichia_coli_4_0522			WP_000455228.1	WP_000455228.1	gap_fill
Escherichia_coli_4_0967			WP_000455228.1	WP_000455228.1	gap_fill
Escherichia_coli_4_1_47FAA			WP_000455227.1	WP_000455227.1
Escherichia_coli_536			WP_000455227.1	WP_000455227.1	ECP_RS21075 or WP_001305044.1
Escherichia_coli_53638			WP_000455227.1	WP_000455227.1	gap_fill
Escherichia_coli_5412		gap_fill	WP_000455227.1	WP_000455227.1	gap_fill
Escherichia_coli_541_1			WP_000455228.1	WP_000455228.1	gap_fill
Escherichia_coli_541_15			WP_000455239.1	WP_000455239.1	gap_fill
Escherichia_coli_55989			WP_000455228.1	WP_000455228.1	gap_fill
Escherichia_coli_5905		gap_fill	WP_000455227.1	WP_000455227.1	gap_fill
Escherichia_coli_5_0588			WP_000455228.1	WP_000455228.1	gap_fill
Escherichia_coli_5_0959			WP_000455240.1	WP_000455240.1	gap_fill
Escherichia_coli_5_2239		gap_fill	WP_000455227.1	WP_000455227.1	gap_fill
Escherichia_coli_6_0172		gap_fill	WP_000455227.1	WP_000455227.1	gap_fill
Escherichia_coli_75			WP_000455227.1	WP_000455227.1	gap_fill
Escherichia_coli_7_1982		gap_fill	WP_000455227.1	WP_000455227.1	gap_fill
Escherichia_coli_83972			WP_000455227.1	WP_000455227.1	WP_001305044.1 or HMPREF0358_RS07735
Escherichia_coli_88_0221		gap_fill	WP_000455227.1	WP_000455227.1	gap_fill
Escherichia_coli_88_1042		gap_fill	WP_000455227.1	WP_000455227.1	gap_fill
Escherichia_coli_88_1467		gap_fill	WP_000455227.1	WP_000455227.1	gap_fill
Escherichia_coli_89_0511		gap_fill	WP_000455227.1	WP_000455227.1	gap_fill
Escherichia_coli_8_0416			WP_000455227.1	WP_000455227.1	gap_fill
Escherichia_coli_8_0566			WP_000455227.1	WP_000455227.1	gap_fill
Escherichia_coli_8_0569			WP_000455227.1	WP_000455227.1	gap_fill
Escherichia_coli_8_0586		gap_fill	WP_000455227.1	WP_000455227.1	gap_fill
Escherichia_coli_8_2524		gap_fill	WP_000455227.1	WP_000455227.1	gap_fill
Escherichia_coli_900105_10e			WP_000455228.1	WP_000455228.1	gap_fill
Escherichia_coli_90_0039		gap_fill	WP_000455227.1	WP_000455227.1	gap_fill
Escherichia_coli_90_0091		gap_fill	WP_000455227.1	WP_000455227.1	gap_fill
Escherichia_coli_90_2281		gap_fill	WP_000455227.1	WP_000455227.1	gap_fill
Escherichia_coli_93_001		gap_fill	WP_000455227.1	WP_000455227.1	gap_fill
Escherichia_coli_93_0055		gap_fill	WP_000455227.1	WP_000455227.1	gap_fill
Escherichia_coli_93_0056		gap_fill	WP_000455227.1	WP_000455227.1	gap_fill
Escherichia_coli_93_0624			WP_000455228.1	WP_000455228.1	gap_fill
Escherichia_coli_94_0618		gap_fill	WP_000455227.1	WP_000455227.1	gap_fill
Escherichia_coli_95_0083		gap_fill	WP_000455227.1	WP_000455227.1	gap_fill
Escherichia_coli_95_0183		gap_fill	WP_000455227.1	WP_000455227.1	gap_fill
Escherichia_coli_95_0941			WP_000455228.1	WP_000455228.1	gap_fill
Escherichia_coli_95_0943		gap_fill	WP_000455227.1	WP_000455227.1	gap_fill
Escherichia_coli_95_1288		gap_fill	WP_000455227.1	WP_000455227.1	gap_fill
Escherichia_coli_96_0107		gap_fill	WP_000455227.1	WP_000455227.1	gap_fill
Escherichia_coli_96_0109		gap_fill	WP_000455227.1	WP_000455227.1	gap_fill
Escherichia_coli_96_0427		gap_fill	WP_000455227.1	WP_000455227.1	gap_fill
Escherichia_coli_96_0428		gap_fill	WP_000455227.1	WP_000455227.1	gap_fill
Escherichia_coli_96_0497			WP_000455228.1	WP_000455228.1	gap_fill
Escherichia_coli_96_0932		gap_fill	WP_000455227.1	WP_000455227.1	gap_fill
Escherichia_coli_96_0939		gap_fill	WP_000455227.1	WP_000455227.1	gap_fill
Escherichia_coli_96_154			WP_000455228.1	WP_000455228.1	gap_fill
Escherichia_coli_97_0003		gap_fill	WP_000455227.1	WP_000455227.1	gap_fill
Escherichia_coli_97_0007		gap_fill	WP_024177600.1		gap_fill
Escherichia_coli_97_0010		gap_fill	WP_000455227.1	WP_000455227.1	gap_fill
Escherichia_coli_97_0246			WP_000455221.1	WP_000455221.1	gap_fill
Escherichia_coli_97_0259		gap_fill	WP_000455227.1	WP_000455227.1	gap_fill
Escherichia_coli_97_0264			WP_000455228.1	WP_000455228.1	gap_fill
Escherichia_coli_99_0670		gap_fill	WP_000455227.1	WP_000455227.1	gap_fill
Escherichia_coli_99_0672		gap_fill	WP_000455227.1	WP_000455227.1	gap_fill
Escherichia_coli_99_0678		gap_fill	WP_000455227.1	WP_000455227.1	gap_fill
Escherichia_coli_99_0713		gap_fill	WP_000455227.1	WP_000455227.1	gap_fill
Escherichia_coli_99_0741			WP_000455228.1	WP_000455228.1	gap_fill
Escherichia_coli_99_0814		gap_fill	WP_000455227.1	WP_000455227.1	gap_fill
Escherichia_coli_99_0815		gap_fill	WP_000455227.1	WP_000455227.1	gap_fill
Escherichia_coli_99_0816		gap_fill	WP_000455227.1	WP_000455227.1	gap_fill
Escherichia_coli_99_0839		gap_fill	WP_000455227.1	WP_000455227.1	gap_fill
Escherichia_coli_99_0848		gap_fill	WP_000455227.1	WP_000455227.1	gap_fill
Escherichia_coli_99_1753		gap_fill	WP_000455227.1	WP_000455227.1	gap_fill
Escherichia_coli_99_1762		gap_fill	WP_000455227.1	WP_000455227.1	gap_fill
Escherichia_coli_99_1775		gap_fill	(WP_024178821.1 or WP_001689432.1)	(WP_001689432.1 or WP_024178821.1)	gap_fill
Escherichia_coli_99_1781		gap_fill	WP_000455227.1	WP_000455227.1	gap_fill
Escherichia_coli_99_1805		gap_fill	WP_000455227.1	WP_000455227.1	gap_fill
Escherichia_coli_9_0111		gap_fill	WP_000455228.1	WP_000455228.1	gap_fill
Escherichia_coli_9_1649			WP_000455227.1	WP_000455227.1	WP_001305044.1 or EC91649_RS03035
Escherichia_coli_AA86			WP_000455235.1	WP_000455235.1	ECAA86_RS02480 or WP_001305044.1
Escherichia_coli_ABU_83972			WP_000455227.1	WP_000455227.1	ECABU_RS22375 or WP_001305044.1
Escherichia_coli_AD30			WP_000455227.1	WP_000455227.1	gap_fill
Escherichia_coli_AI27			WP_000455228.1	WP_000455228.1	gap_fill
Escherichia_coli_APEC_O1			WP_000455225.1	WP_000455225.1	WP_011703709.1 or APECO1_RS22415
Escherichia_coli_APEC_O78			WP_000455228.1	WP_000455228.1	gap_fill
Escherichia_coli_ARS4_2123			WP_000455227.1	WP_000455227.1	ECARS42123_RS02935 or WP_001305044.1
Escherichia_coli_ATCC_25922			WP_000455227.1	WP_000455227.1	DR76_RS02695 or WP_001305044.1
Escherichia_coli_ATCC_700728		gap_fill	WP_000455227.1	WP_000455227.1	gap_fill
Escherichia_coli_ATCC_8739		gap_fill	WP_000455227.1	WP_000455227.1	gap_fill
Escherichia_coli_B088			WP_000455228.1	WP_000455228.1	gap_fill
Escherichia_coli_B093		gap_fill	WP_000455227.1	WP_000455227.1	gap_fill
Escherichia_coli_B171		gap_fill	WP_000455228.1	WP_000455228.1	gap_fill
Escherichia_coli_B185		gap_fill	WP_000455227.1	WP_000455227.1	gap_fill
Escherichia_coli_B354		gap_fill	WP_000455227.1	WP_000455227.1	gap_fill
Escherichia_coli_B41			WP_000455227.1	WP_000455227.1	gap_fill
Escherichia_coli_B799			WP_000455228.1	WP_000455228.1	gap_fill
Escherichia_coli_B7A			WP_000455228.1	WP_000455228.1	gap_fill
Escherichia_coli_BCE001_MS16			WP_000455227.1	WP_000455227.1	gap_fill
Escherichia_coli_BCE002_MS12			WP_000455227.1	WP_000455227.1	gap_fill
Escherichia_coli_BCE006_MS_23		gap_fill	WP_000455227.1	WP_000455227.1	gap_fill
Escherichia_coli_BCE007_MS_11		gap_fill	WP_000455227.1	WP_000455227.1	gap_fill
Escherichia_coli_BCE008_MS_13		gap_fill	WP_000455227.1	WP_000455227.1	WP_001411965.1 or ECBCE008MS13_RS01785
Escherichia_coli_BCE011_MS_01			WP_001414441.1	WP_001414441.1	gap_fill
Escherichia_coli_BCE019_MS_13		gap_fill	WP_000455227.1	WP_000455227.1	ECBCE019MS13_RS03685 or WP_001699466.1
Escherichia_coli_BCE030_MS_09		gap_fill	WP_000455227.1	WP_000455227.1	WP_001417134.1 or ECBCE030MS09_RS04200
Escherichia_coli_BCE032_MS_12		gap_fill	WP_000455227.1	WP_000455227.1	gap_fill
Escherichia_coli_BCE034_MS_14			WP_001697342.1	WP_001697342.1	gap_fill
Escherichia_coli_BL21DE3		gap_fill	WP_000455227.1	WP_000455227.1	gap_fill
Escherichia_coli_BW25113			WP_000455227.1	WP_000455227.1
Escherichia_coli_BW2952			WP_000455227.1	WP_000455227.1	gap_fill
Escherichia_coli_B_str_REL606		gap_fill	WP_000455227.1	WP_000455227.1	gap_fill
Escherichia_coli_C639_08			WP_000455227.1	WP_000455227.1	WP_001305044.1 or ECC63908_RS13985
Escherichia_coli_C844_97			WP_000455227.1	WP_000455227.1	ECC84497_RS22230 or WP_001305044.1
Escherichia_coli_CB7326		gap_fill	WP_000455227.1	WP_000455227.1	gap_fill
Escherichia_coli_CFT073			WP_000455227.1	WP_000455227.1	C_RS23075 or WP_001305044.1
Escherichia_coli_chi7122			WP_000455228.1	WP_000455228.1	gap_fill
Escherichia_coli_cloneA_i1			WP_000455225.1	WP_000455225.1	WP_024251986.1 or I01_RS02350
Escherichia_coli_CUMT8			WP_000455228.1	WP_000455228.1	gap_fill
Escherichia_coli_C_34666			WP_003952335.1	WP_003952335.1	ECC34666_RS02675 or WP_003958842.1
Escherichia_coli_D9			WP_000455228.1	WP_000455228.1
Escherichia_coli_DEC10A			WP_000455228.1	WP_000455228.1	gap_fill
Escherichia_coli_DEC10B			WP_000455228.1	WP_000455228.1	gap_fill
Escherichia_coli_DEC10C			WP_000455228.1	WP_000455228.1	gap_fill
Escherichia_coli_DEC10D			WP_000455228.1	WP_000455228.1	gap_fill
Escherichia_coli_DEC10E			WP_000455228.1	WP_000455228.1	gap_fill
Escherichia_coli_DEC10F			WP_000455228.1	WP_000455228.1	gap_fill
Escherichia_coli_DEC11A			WP_000455228.1	WP_000455228.1	gap_fill
Escherichia_coli_DEC11B			WP_000455228.1	WP_000455228.1	gap_fill
Escherichia_coli_DEC11C		gap_fill	WP_000455228.1	WP_000455228.1	gap_fill
Escherichia_coli_DEC11D			WP_000455228.1	WP_000455228.1	gap_fill
Escherichia_coli_DEC11E			WP_000455228.1	WP_000455228.1	gap_fill
Escherichia_coli_DEC12A		gap_fill	WP_000455228.1	WP_000455228.1	gap_fill
Escherichia_coli_DEC12B		gap_fill	WP_000455228.1	WP_000455228.1	gap_fill
Escherichia_coli_DEC12C		gap_fill	WP_000455228.1	WP_000455228.1	gap_fill
Escherichia_coli_DEC12D			WP_000455228.1	WP_000455228.1	gap_fill
Escherichia_coli_DEC12E			WP_000455228.1	WP_000455228.1	gap_fill
Escherichia_coli_DEC13A			WP_000455228.1	WP_000455228.1	gap_fill
Escherichia_coli_DEC13B			WP_000455228.1	WP_000455228.1	gap_fill
Escherichia_coli_DEC13C			WP_000455228.1	WP_000455228.1	gap_fill
Escherichia_coli_DEC13D			WP_000455228.1	WP_000455228.1	gap_fill
Escherichia_coli_DEC13E			WP_000455228.1	WP_000455228.1	gap_fill
Escherichia_coli_DEC14A			WP_000455228.1	WP_000455228.1	gap_fill
Escherichia_coli_DEC14B		gap_fill	WP_000455228.1	WP_000455228.1	gap_fill
Escherichia_coli_DEC14C		gap_fill	WP_000455228.1	WP_000455228.1	gap_fill
Escherichia_coli_DEC14D			WP_000455228.1	WP_000455228.1	gap_fill
Escherichia_coli_DEC15A			WP_000455228.1	WP_000455228.1	gap_fill
Escherichia_coli_DEC15B			WP_000455228.1	WP_000455228.1	gap_fill
Escherichia_coli_DEC15C			WP_000455228.1	WP_000455228.1	gap_fill
Escherichia_coli_DEC15D			WP_000455228.1	WP_000455228.1	gap_fill
Escherichia_coli_DEC15E			WP_000455228.1	WP_000455228.1	gap_fill
Escherichia_coli_DEC1A			WP_000455227.1	WP_000455227.1	WP_001305044.1 or BE46_RS03095
Escherichia_coli_DEC1B			WP_000455227.1	WP_000455227.1	BC88_RS03235 or WP_001305044.1
Escherichia_coli_DEC1C			WP_000455227.1	WP_000455227.1	BC57_RS02510 or WP_001305044.1
Escherichia_coli_DEC1D			WP_000455227.1	WP_000455227.1	BC41_RS00895 or WP_001305044.1
Escherichia_coli_DEC1E			WP_000455227.1	WP_000455227.1	WP_001305044.1 or BF02_RS02545
Escherichia_coli_DEC2A			WP_000455227.1	WP_000455227.1	BD68_RS02010 or WP_001305044.1
Escherichia_coli_DEC2B			WP_000455227.1	WP_000455227.1	BC68_RS02555 or WP_001305044.1
Escherichia_coli_DEC2C			WP_000455227.1	WP_000455227.1	BF07_RS03565 or WP_001305044.1
Escherichia_coli_DEC2D			WP_000455227.1	WP_000455227.1	BE94_RS02025 or WP_001305044.1
Escherichia_coli_DEC2E			WP_000455227.1	WP_000455227.1	WP_001305044.1 or BD19_RS02925
Escherichia_coli_DEC3A		gap_fill	WP_000455227.1	WP_000455227.1	gap_fill
Escherichia_coli_DEC3B		gap_fill	WP_000455227.1	WP_000455227.1	gap_fill
Escherichia_coli_DEC3C		gap_fill	WP_000455227.1	WP_000455227.1	gap_fill
Escherichia_coli_DEC3D		gap_fill	WP_000455227.1	WP_000455227.1	gap_fill
Escherichia_coli_DEC3E		gap_fill	WP_000455227.1	WP_000455227.1	gap_fill
Escherichia_coli_DEC3F		gap_fill	WP_000455227.1	WP_000455227.1	gap_fill
Escherichia_coli_DEC4A		gap_fill	WP_000455227.1	WP_000455227.1	gap_fill
Escherichia_coli_DEC4B		gap_fill	WP_000455227.1	WP_000455227.1	gap_fill
Escherichia_coli_DEC4C		gap_fill	WP_000455227.1	WP_000455227.1	gap_fill
Escherichia_coli_DEC4D		gap_fill	WP_000455227.1	WP_000455227.1	gap_fill
Escherichia_coli_DEC4E		gap_fill	WP_000455227.1	WP_000455227.1	gap_fill
Escherichia_coli_DEC4F		gap_fill	WP_000455227.1	WP_000455227.1	gap_fill
Escherichia_coli_DEC5A		gap_fill	WP_000455227.1	WP_000455227.1	gap_fill
Escherichia_coli_DEC5B		gap_fill	WP_000455227.1	WP_000455227.1	gap_fill
Escherichia_coli_DEC5C		gap_fill	WP_000455227.1	WP_000455227.1	gap_fill
Escherichia_coli_DEC5D		gap_fill	WP_000455227.1	WP_000455227.1	gap_fill
Escherichia_coli_DEC5E		gap_fill	WP_000455227.1	WP_000455227.1	gap_fill
Escherichia_coli_DEC6A			WP_000455227.1	WP_000455227.1	gap_fill
Escherichia_coli_DEC6B		gap_fill	WP_000455227.1	WP_000455227.1	gap_fill
Escherichia_coli_DEC6C			WP_000455227.1	WP_000455227.1	gap_fill
Escherichia_coli_DEC6D			WP_000455227.1	WP_000455227.1	gap_fill
Escherichia_coli_DEC6E			WP_000455227.1	WP_000455227.1	gap_fill
Escherichia_coli_DEC7A			WP_000455228.1	WP_000455228.1	gap_fill
Escherichia_coli_DEC7B			WP_000455227.1	WP_000455227.1	gap_fill
Escherichia_coli_DEC7C			WP_000455228.1	WP_000455228.1	gap_fill
Escherichia_coli_DEC7D			WP_000455228.1	WP_000455228.1	gap_fill
Escherichia_coli_DEC7E			WP_000455228.1	WP_000455228.1	gap_fill
Escherichia_coli_DEC8A		gap_fill	WP_000455228.1	WP_000455228.1	gap_fill
Escherichia_coli_DEC8B		gap_fill	WP_000455229.1	WP_000455229.1	gap_fill
Escherichia_coli_DEC8C		gap_fill	WP_000455228.1	WP_000455228.1	gap_fill
Escherichia_coli_DEC8D			WP_000455228.1	WP_000455228.1	gap_fill
Escherichia_coli_DEC8E		gap_fill	WP_000455228.1	WP_000455228.1	gap_fill
Escherichia_coli_DEC9A			WP_000455228.1	WP_000455228.1	gap_fill
Escherichia_coli_DEC9B			WP_000455228.1	WP_000455228.1	gap_fill
Escherichia_coli_DEC9C			WP_000455228.1	WP_000455228.1	gap_fill
Escherichia_coli_DEC9D			WP_000455228.1	WP_000455228.1	gap_fill
Escherichia_coli_DEC9E			WP_000455228.1	WP_000455228.1	gap_fill
[truncated: 3,649 more rows]

## Sheet: ST3B_VMH_reactions
model	organism	DVPROTOCHLOROPH1	TRPO2	L_ARONR	HBZOPT
Bacteroides_pyogenes_DSM20611	Bacteroides pyogenes DSM20611	g.207059.CDS.2412
Ralstonia_sp_5_7_47FAA	Ralstonia sp. 5_7_47FAA		658664.3.peg.2328		658664.3.peg.2752
Bacillus_cereus_G9842	Bacillus cereus G9842		6666666.58845.peg.2649
Bacillus_cereus_AH187_F4810_72	Bacillus cereus AH187 (F4810/72)		6666666.58844.peg.2986
Providencia_rustigianii_DSM_4541	Providencia rustigianii DSM 4541		500637.6.peg.5487 and 500637.6.peg.870		500637.6.peg.2465 and 500637.6.peg.6923
Pseudomonas_aeruginosa_NCGM2_S1	Pseudomonas aeruginosa NCGM2.S1		1089456.5.peg.3581		1089456.5.peg.6108
Stenotrophomonas_maltophilia_D457	Stenotrophomonas maltophilia D457		g.25005.CDS.4322		1163399.5.peg.4095
Brevundimonas_bacteroides_DSM_4726	Brevundimonas bacteroides DSM 4726		g.240103.CDS.270		g.240103.CDS.1278
Alcaligenes_faecalis_subsp_faecalis_NCIB_8687	Alcaligenes faecalis subsp. faecalis NCIB 8687		g.24921.CDS.3640		1156918.4.peg.3205
Burkholderia_cepacia_GG4	Burkholderia cepacia GG4		g.23290.CDS.508		1009846.3.peg.2918
Brevibacillus_agri_5_2	Brevibacillus agri 5-2		g.240096.CDS.4670		g.240096.CDS.884
Bordetella_hinzii_OH87_BAL007II	Bordetella hinzii OH87 BAL007II		g.240068.CDS.2585		g.240068.CDS.2882
Blastococcus_massiliensis_AP3	Blastococcus massiliensis AP3		g.208017.CDS.3022	g.208017.CDS.1157
Stenotrophomonas_rhizophila_PCA13	Stenotrophomonas rhizophila PCA13		g.245260.CDS.291		g.245260.CDS.953
Brevibacillus_agri_BAB_2500	Brevibacillus agri BAB-2500		g.25856.CDS.1190		1246477.3.peg.2619
Bacillus_infantis_NRRL_B_14911	Bacillus infantis NRRL B-14911		g.210869.CDS.2884		Unknown
Brevibacterium_casei_S18	Brevibacterium casei S18		g.25726.CDS.919	g.25726.CDS.2065
Oceanobacillus_picturae_strain_S1	Oceanobacillus picturae strain S1		g.242144.CDS.2660		Unknown
Bacillus_endophyticus_2102	Bacillus endophyticus 2102		g.25385.CDS.2979		Unknown
Bacillus_firmus_DS1	Bacillus firmus DS1		g.209412.CDS.539		Unknown
Bacillus_pseudofirmus_OF4	Bacillus pseudofirmus OF4		g.1270.peg.1668		Unknown
Brevibacillus_brevis_NBRC_100599	Brevibacillus brevis NBRC 100599		g.1051.peg.1605		Unknown
Exiguobacterium_aurantiacum_DSM_6208	Exiguobacterium aurantiacum DSM 6208		g.241173.CDS.386		Unknown
Kytococcus_sedentarius_DSM_20547	Kytococcus sedentarius DSM 20547		g.1725.peg.1932	g.1725.peg.1121
Delftia_acidovorans_SPH_1	Delftia acidovorans SPH-1		g.1274.peg.1951 and g.1274.peg.1362		398578.3.peg.1015
Staphylococcus_vitulinus_F1028	Staphylococcus vitulinus F1028		g.25042.CDS.2024		Unknown
Roseomonas_mucosa_ATCC_BAA_692	Roseomonas mucosa ATCC BAA-692		g.242544.CDS.1681		g.242544.CDS.3505
Serratia_fonticola_RB_25	Serratia fonticola RB-25		g.214943.CDS.4775		g.214943.CDS.1659
Staphylococcus_sciuri_subsp_sciuri_Z8	Staphylococcus sciuri subsp. sciuri Z8		g.244081.CDS.2263		Unknown
Bacillus_fordii_DSM_16014	Bacillus fordii DSM 16014		g.29556.CDS.3925		Unknown
Paenibacillus_graminis_C4D1M	Paenibacillus graminis C4D1M		g.1267.peg.2219		g.1267.peg.117
Serratia_liquefaciens_ATCC_27592	Serratia liquefaciens ATCC 27592		g.210587.CDS.3490		g.210587.CDS.4594
Brevundimonas_diminuta_470_4	Brevundimonas diminuta 470-4		g.29103.CDS.1427		1035191.3.peg.129
Brevibacillus_borstelensis_AK1	Brevibacillus borstelensis AK1		g.31926.CDS.339		1300222.3.peg.1285
Staphylococcus_cohnii_hu_01	Staphylococcus cohnii hu-01		g.213837.CDS.2708		Unknown
Alcaligenes_faecalis_subsp_faecalis_NBRC_13111	Alcaligenes faecalis subsp. faecalis NBRC 13111		g.239717.CDS.2301		g.239717.CDS.2291
Brevibacterium_linens_BL2	Brevibacterium linens BL2		g.878.peg.3241	g.878.peg.424	Unknown
Micromonospora_aurantiaca_ATCC_27029	Micromonospora aurantiaca ATCC 27029		g.2745.peg.4161	g.2745.peg.4203	Unknown
Silanimonas_lenta_DSM_16282	Silanimonas lenta DSM 16282		g.207277.CDS.1575		g.207277.CDS.480
Bacillus_clausii_KSM_K16	Bacillus clausii KSM-K16		g.2880.peg.4112
Bacillus_mycoides_DSM_2048	Bacillus mycoides DSM 2048		g.2087.peg.2276		Unknown
Achromobacter_xylosoxidans_NBRC_15126	Achromobacter xylosoxidans NBRC 15126 = ATCC 27061		g.208127.CDS.1023		g.208127.CDS.6030
Rudanella_lutea_DSM_19387	Rudanella lutea DSM 19387		g.29244.CDS.48		Unknown
Bacillus_megaterium_DSM319	Bacillus megaterium DSM319		g.2568.peg.2522		Unknown
Bacillus_thuringiensis_serovar_thuringiensis_str_T01001	Bacillus thuringiensis serovar thuringiensis str. T01001		g.2101.peg.3409		Unknown
Achromobacter_xylosoxidans_A8	Achromobacter xylosoxidans A8		g.3268.peg.606		762376.5.peg.6344
Rhodococcus_erythropolis_PR4	Rhodococcus erythropolis PR4		g.461.peg.432	g.461.peg.6015	Unknown
Bacillus_timonensis_10403023	Bacillus timonensis 10403023		g.23344.CDS.2346		Unknown
Serratia_marcescens_subsp_marcescens_Db11	Serratia marcescens Db11		g.245248.CDS.2817		615.1.peg.1934
Bifidobacterium_longum_longum_ATCC_55813	Bifidobacterium longum longum ATCC 55813			548480.3.peg.1409
Bifidobacterium_bifidum_S17	Bifidobacterium bifidum S17			883062.8.peg.663
Bifidobacterium_gallicum_DSM_20093	Bifidobacterium gallicum DSM 20093			561180.4.peg.351
Bifidobacterium_bifidum_BGN4	Bifidobacterium bifidum BGN4			484020.6.peg.601
Bifidobacterium_animalis_lactis_Bl_04_ATCC_SD5219	Bifidobacterium animalis lactis Bl-04, ATCC SD5219			580050.13.peg.1156
Bifidobacterium_longum_longum_JCM_1217	Bifidobacterium longum longum JCM 1217			565042.11.peg.1269
Anaerofustis_stercorihominis_DSM_17244	Anaerofustis stercorihominis DSM 17244			6666666.58838.peg.791
Bifidobacterium_pseudocatenulatum_DSM_20438	Bifidobacterium pseudocatenulatum DSM 20438			547043.6.peg.599
Eubacterium_siraeum_DSM_15702	Eubacterium siraeum DSM 15702			428128.7.peg.1209
Bifidobacterium_catenulatum_DSM_16992	Bifidobacterium catenulatum DSM 16992			566552.4.peg.416
Bifidobacterium_dentium_ATCC_27678	Bifidobacterium dentium ATCC 27678			6666666.58910.peg.1473
Bifidobacterium_breve_UCC2003_NCIMB8807	Bifidobacterium breve UCC2003 (NCIMB8807)			326426.7.peg.1319
Bifidobacterium_longum_longum_JDM301	Bifidobacterium longum longum JDM301			759350.9.peg.1253
Bifidobacterium_longum_longum_CCUG_52486	Bifidobacterium longum longum CCUG 52486			537937.5.peg.1422
Bifidobacterium_animalis_lactis_V9	Bifidobacterium animalis lactis V9			573236.5.peg.1162
Bifidobacterium_longum_infantis_157F_NC	Bifidobacterium longum infantis 157F-NC			565040.3.peg.1290
Bifidobacterium_longum_longum_BBMN68	Bifidobacterium longum longum BBMN68			890402.8.peg.282
Bifidobacterium_animalis_lactis_BB_12	Bifidobacterium animalis lactis BB-12			552531.5.peg.22
Actinomyces_odontolyticus_ATCC_17982	Actinomyces odontolyticus ATCC 17982			411466.7.peg.1197
Bifidobacterium_adolescentis_ATCC_15703	Bifidobacterium adolescentis ATCC 15703			367928.17.peg.1152
Bifidobacterium_animalis_lactis_CNCM_I_2494	Bifidobacterium animalis lactis CNCM I-2494			1042403.6.peg.1161
Bifidobacterium_animalis_lactis_AD011	Bifidobacterium animalis lactis AD011			442563.3.peg.756
Bifidobacterium_angulatum_DSM_20098	Bifidobacterium angulatum DSM 20098			518635.5.peg.724
Bifidobacterium_animalis_lactis_Bi_07	Bifidobacterium animalis lactis Bi-07			742729.5.peg.1155
Bifidobacterium_breve_HPH0326	Bifidobacterium breve HPH0326			6666666.58908.peg.1450
Propionibacterium_freudenreichii_subsp_shermanii_CIRM_BIA1	Propionibacterium freudenreichii subsp. shermanii CIRM-BIA1			g.3231.peg.504
Eubacterium_siraeum_70_3	Eubacterium siraeum 70/3			657319.3.peg.1113
Bifidobacterium_longum_E18	Bifidobacterium longum E18			1322347.3.peg.1263
Bifidobacterium_longum_infantis_ATCC_15697	Bifidobacterium longum infantis ATCC 15697			391904.5.peg.923
Anaerotruncus_colihominis_DSM_17241	Anaerotruncus colihominis DSM 17241			445972.6.peg.3666
Bifidobacterium_bifidum_NCIMB_41171	Bifidobacterium bifidum NCIMB 41171			398513.5.peg.32
Bifidobacterium_longum_DJO10A	Bifidobacterium longum DJO10A			6666666.58915.peg.277
Bifidobacterium_animalis_lactis_DSM_10140	Bifidobacterium animalis lactis DSM 10140			555970.12.peg.1164
Bifidobacterium_bifidum_PRL2010	Bifidobacterium bifidum PRL2010			702459.6.peg.645
Bifidobacterium_longum_NCC2705	Bifidobacterium longum NCC2705			206672.9.peg.242
Pyramidobacter_piscolens_W5455	Pyramidobacter piscolens W5455			g.1034.peg.1849
Eubacterium_desmolans_ATCC_43058	Eubacterium desmolans ATCC 43058			g.241166.CDS.712
Corynebacterium_tuberculostearicum_SK141	Corynebacterium tuberculostearicum SK141			g.2253.peg.1236	Unknown
Bifidobacterium_coryneforme_DSM_20216	Bifidobacterium coryneforme DSM 20216			g.244860.CDS.910
Gordonia_terrae_NBRC_100016	Gordonia terrae NBRC 100016			g.241256.CDS.2846
Microbacterium_oleivorans_NBRC_103075	Microbacterium oleivorans NBRC 103075			g.241914.CDS.252	Unknown
Actinomyces_oris_K20	Actinomyces oris K20			g.27961.CDS.1712
Actinomyces_naeslundii_str_Howell_279	Actinomyces naeslundii str. Howell 279			g.24325.CDS.2630	Unknown
Rothia_mucilaginosa_DY_18	Rothia mucilaginosa DY-18			g.2950.peg.899
Gordonia_rubripertincta_NBRC_101908	Gordonia rubripertincta NBRC 101908			g.23931.CDS.2840
Corynebacterium_ulcerans_809	Corynebacterium ulcerans 809			g.3796.peg.1007	Unknown
Corynebacterium_aurimucosum_ATCC_700975	Corynebacterium aurimucosum ATCC 700975			g.2212.peg.913	Unknown
Brevibacterium_massiliense_5401308	Brevibacterium massiliense 5401308			g.25151.CDS.1083
Rhodococcus_equi_ATCC_33707	Rhodococcus equi ATCC 33707			g.26854.CDS.3631
Corynebacterium_amycolatum_SK46	Corynebacterium amycolatum SK46			g.2252.peg.714
Ruminococcus_callidus_ATCC_2776001	Ruminococcus callidus ATCC 2776001			g.215865.CDS.1118
Propionibacterium_propionicum_F0230a	Propionibacterium propionicum F0230a			g.27741.CDS.1720
Propionibacterium_jensenii_DSM_20535	Propionibacterium jensenii DSM 20535			g.207245.CDS.541	Unknown
Propionibacterium_acidipropionici_ATCC_4875	Propionibacterium acidipropionici ATCC 4875			g.25121.CDS.1571	Unknown
Microbacterium_paraoxydans_77MFTsu3_2	Microbacterium paraoxydans 77MFTsu3.2			g.29982.CDS.577	Unknown
Atopobium_minutum_10063974	Atopobium minutum 10063974			g.32451.CDS.853
Varibaculum_cambriense_DSM_15806	Varibaculum cambriense DSM 15806			g.207318.CDS.1291	Unknown
Rothia_aeria_F0474	Rothia aeria F0474			g.24422.CDS.390	Unknown
Bifidobacterium_boum_DSM_20432	Bifidobacterium boum DSM 20432			g.239935.CDS.707
Mobiluncus_curtisii_ATCC_43063	Mobiluncus curtisii ATCC 43063			g.2215.peg.628
Dietzia_cinnamea_P4	Dietzia cinnamea P4			g.28335.CDS.533
Corynebacterium_kroppenstedtii_DSM_44385	Corynebacterium kroppenstedtii DSM 44385			g.2752.peg.1207
Bifidobacterium_ruminantium_DSM_6489	Bifidobacterium ruminantium DSM 6489			g.239970.CDS.702	Unknown
Scardovia_inopinata_F0304	Scardovia inopinata F0304			g.2728.peg.1274
Microbacterium_gubbeenense_DSM_15944	Microbacterium gubbeenense DSM 15944			g.207197.CDS.2626	Unknown
Rhodococcus_rhodochrous_ATCC_21198	Rhodococcus rhodochrous ATCC 21198			g.214743.CDS.5457	Unknown
Actinomyces_urogenitalis_DSM_15434	Actinomyces urogenitalis DSM 15434			g.1979.peg.845
Propionibacterium_avidum_44067	Propionibacterium avidum 44067			g.30858.CDS.1050	Unknown
Mycobacterium_avium_subsp_avium_ATCC_25291	Mycobacterium avium subsp. avium ATCC 25291			g.2261.peg.2631
Brachybacterium_paraconglomeratum_LC44	Brachybacterium paraconglomeratum LC44			g.23654.CDS.2836	Unknown
Actinomyces_cardiffensis_F0333	Actinomyces cardiffensis F0333			g.32379.CDS.1602	Unknown
Slackia_piriformis_YIT_12062	Slackia piriformis YIT 12062			g.27488.CDS.266	Unknown
Actinomyces_graevenitzii_C83	Actinomyces graevenitzii C83			g.26676.CDS.550
Trueperella_pyogenes_MS249	Trueperella pyogenes MS249			g.215043.CDS.1268
Actinomyces_turicensis_ACS_279_V_Col4	Actinomyces turicensis ACS-279-V-Col4			g.28017.CDS.283
Arthrobacter_castelli_DSM_16402	Arthrobacter castelli DSM 16402			g.207043.CDS.2635	Unknown
Corynebacterium_ammoniagenes_DSM_20306	Corynebacterium ammoniagenes DSM 20306			g.2775.peg.1029
Gordonia_terrae_C_6	Gordonia terrae C-6			g.31992.CDS.2616
Bifidobacterium_mongoliense_DSM_21395	Bifidobacterium mongoliense DSM 21395			g.239961.CDS.1728
Corynebacterium_striatum_ATCC_6940	Corynebacterium striatum ATCC 6940			g.1991.peg.832	Unknown
Rothia_dentocariosa_ATCC_17931	Rothia dentocariosa ATCC 17931			g.3274.peg.643
Kocuria_palustris_PEL	Kocuria palustris PEL			g.25806.CDS.2467
Olsenella_profusa_F019501	Olsenella profusa F019501			g.207382.CDS.1620
Micrococcus_luteus_NCTC_2665	Micrococcus luteus NCTC 2665			g.1629.peg.532
Actinomyces_georgiae_DSM_6843	Actinomyces georgiae DSM 6843			g.207006.CDS.1421	Unknown
Corynebacterium_durum_F0235	Corynebacterium durum F0235			g.29106.CDS.1461	Unknown
Bifidobacterium_kashiwanohense_DSM_21854	Bifidobacterium kashiwanohense DSM 21854			g.239945.CDS.80
Collinsella_tanakaei_YIT_12063	Collinsella tanakaei YIT 12063			g.27481.CDS.679	Unknown
Corynebacterium_glucuronolyticum_ATCC_51867	Corynebacterium glucuronolyticum ATCC 51867			g.2213.peg.251
Mycobacterium_fortuitum_subsp_fortuitum_DSM_46621	Mycobacterium fortuitum subsp. fortuitum DSM 46621			g.25575.CDS.3591	Unknown
Bifidobacterium_pseudolongum_subsp_Pseudolongum_DSM_20099	Bifidobacterium pseudolongum subsp. Pseudolongum DSM 20099			g.239965.CDS.736
Bifidobacterium_thermacidophilum_subsp_thermacidophilum_DSM_15837	Bifidobacterium thermacidophilum subsp. thermacidophilum DSM 15837			g.239981.CDS.829	Unknown
Actinomyces_viscosus_C505	Actinomyces viscosus C505			g.2332.peg.570	Unknown
Bifidobacterium_thermophilum_RBL67	Bifidobacterium thermophilum RBL67			g.31452.CDS.677
Rhodococcus_equi_NBRC_101255	Rhodococcus equi NBRC 101255 = C 701			g.208134.CDS.679
Bifidobacterium_scardovii_JCM_12489	Bifidobacterium scardovii JCM 12489 = DSM 13734			g.239975.CDS.1672
Dermacoccus_nishinomiyaensis	Dermacoccus nishinomiyaensis			g.244937.CDS.1763
Corynebacterium_ureicelerivorans	Corynebacterium ureicelerivorans			g.244935.CDS.771
Kocuria_rhizophila_DC2201	Kocuria rhizophila DC2201			g.1142.peg.620
Cellulosimicrobium_cellulans_J36	Cellulosimicrobium cellulans J36			g.216424.CDS.2598	Unknown
Tropheryma_whipplei_str_Twist	Tropheryma whipplei str. Twist			g.338.peg.741
Olsenella_uli_DSM_7084	Olsenella uli DSM 7084			g.2670.peg.1263
Curtobacterium_flaccumfaciens_UCD_AKU	Curtobacterium flaccumfaciens UCD-AKU			g.31863.CDS.2562	Unknown
Propionibacterium_acnes_KPA171202	Propionibacterium acnes KPA171202			g.580.peg.378
Corynebacterium_propinquum_DSM_44285	Corynebacterium propinquum DSM 44285			g.29586.CDS.896
Bifidobacterium_stercoris_DSM_24849	Bifidobacterium stercoris DSM 24849			g.239977.CDS.335	Unknown
Citrobacter_youngae_ATCC_29220	Citrobacter youngae ATCC 29220				500640.5.peg.4409
Enterobacter_cancerogenus_ATCC_35316	Enterobacter cancerogenus ATCC 35316				500639.8.peg.2467
Helicobacter_cinaedi_CCUG_18818	Helicobacter cinaedi CCUG 18818				537971.5.peg.1298
Klebsiella_sp_1_1_55	Klebsiella sp. 1_1_55				469608.3.peg.4217
Bartonella_quintana_Toulouse	Bartonella quintana Toulouse				283165.6.peg.438
Megamonas_hypermegale_ART12_1	Megamonas hypermegale ART12/1				657316.3.peg.1682
Escherichia_coli_str_K_12_substr_MG1655	Escherichia coli str. K-12 substr. MG1655				511145.12.peg.4157
Citrobacter_sp_30_2	Citrobacter sp. 30_2				469595.3.peg.4401
Proteus_penneri_ATCC_35198	Proteus penneri ATCC 35198				471881.3.peg.3331 and g.1703.peg.2329
Providencia_alcalifaciens_DSM_30120	Providencia alcalifaciens DSM 30120				520999.6.peg.1468
Helicobacter_pylori_26695	Helicobacter pylori 26695				85962.8.peg.1424
Salmonella_enterica_enterica_sv_Typhimurium_LT2	Salmonella enterica enterica sv Typhimurium LT2				99287.1.peg.4072
Helicobacter_bilis_ATCC_43879	Helicobacter bilis ATCC 43879				613026.4.peg.1062
Edwardsiella_tarda_ATCC_23685	Edwardsiella tarda ATCC 23685				500638.3.peg.116
Helicobacter_winghamensis_ATCC_BAA_430	Helicobacter winghamensis ATCC BAA-430				556267.4.peg.915
Escherichia_sp_4_1_40B	Escherichia sp. 4_1_40B				457401.3.peg.3312
Escherichia_sp_3_2_53FAA	Escherichia sp. 3_2_53FAA				469598.5.peg.3324
Providencia_stuartii_ATCC_25827	Providencia stuartii ATCC 25827				471874.6.peg.3746
Oxalobacter_formigenes_OXCC13	Oxalobacter formigenes OXCC13				556269.4.peg.1008
Campylobacter_upsaliensis_JV21	Campylobacter upsaliensis JV21				888826.3.peg.1565
Desulfovibrio_piger_ATCC_29098	Desulfovibrio piger ATCC 29098				411464.8.peg.2008
Desulfovibrio_sp_3_1_syn3	Desulfovibrio sp. 3_1_syn3				457398.5.peg.2595
Campylobacter_curvus_525_92	Campylobacter curvus 525.92				360105.10.peg.207
Escherichia_sp_1_1_43	Escherichia sp. 1_1_43				457400.3.peg.314
Escherichia_coli_SE11	Escherichia coli SE11				6666666.59080.peg.4566
Escherichia_coli_O157_H7_str_Sakai	Escherichia coli O157:H7 str. Sakai				386585.9.peg.5246
Helicobacter_pullorum_MIT_98_5489	Helicobacter pullorum MIT 98-5489				537972.5.peg.1533
Klebsiella_pneumoniae_pneumoniae_MGH78578	Klebsiella pneumoniae pneumoniae MGH78578				272620.3.peg.4446
Mitsuokella_multacida_DSM_20544	Mitsuokella multacida DSM 20544				500635.8.peg.1449
Providencia_rettgeri_DSM_1131	Providencia rettgeri DSM 1131				521000.6.peg.17
Citrobacter_koseri_ATCC_BAA_895	Citrobacter koseri ATCC BAA-895				6666666.58943.peg.3351
Laribacter_hongkongensis_HLHK9	Laribacter hongkongensis HLHK9				557598.5.peg.317
Enterobacteriaceae_bacterium_9_2_54FAA	Enterobacteriaceae bacterium 9_2_54FAA				469613.3.peg.2740
Oxalobacter_formigenes_HOxBLS	Oxalobacter formigenes HOxBLS				556268.6.peg.2272
Edwardsiella_tarda_FL6_60	Edwardsiella tarda FL6-60				6666666.59001.peg.187
Helicobacter_canadensis_MIT_98_5491	Helicobacter canadensis MIT 98-5491				537970.15.peg.1538
Alistipes_putredinis_DSM_17216	Alistipes putredinis DSM 17216				g.1522.peg.1664
Escherichia_coli_UTI89_UPEC	Escherichia coli UTI89 (UPEC)				364106.8.peg.4488
Acinetobacter_junii_SH205	Acinetobacter junii SH205				575587.3.peg.376
Cronobacter_sakazakii_ATCC_BAA_894	Cronobacter sakazakii ATCC BAA-894				290339.8.peg.75
Clostridium_citroniae_WAL_17108	Clostridium citroniae WAL-17108				Unknown
Citrobacter_freundii_UCI_31	Citrobacter freundii UCI 31				g.212102.CDS.464
Bacillus_nealsonii_AAU1	Bacillus nealsonii AAU1				Unknown
Enterobacter_aerogenes_KCTC_2190	Enterobacter aerogenes KCTC 2190				1028307.3.peg.1677
Bacillus_halodurans_C_125	Bacillus halodurans C-125				Unknown
Succinivibrio_dextrinosolvens_H5	Succinivibrio dextrinosolvens H5				Unknown
Clostridium_celatum_DSM_1785	Clostridium celatum DSM 1785				545697.3.peg.2983
Bacteroides_ureolyticus_DSM_20703	Bacteroides ureolyticus DSM 20703				1121102.3.peg.560
Aggregatibacter_aphrophilus_NJ8700	Aggregatibacter aphrophilus NJ8700				634176.4.peg.1956 and 634176.4.peg.1957
Staphylococcus_capitis_CR0101	Staphylococcus capitis CR0101				Unknown
Methyloversatilis_universalis_FAM5	Methyloversatilis universalis FAM5				1000565.3.peg.3597
Staphylococcus_warneri_SG1	Staphylococcus warneri SG1				Unknown
Vibrio_parahaemolyticus_RIMD_2210633	Vibrio parahaemolyticus RIMD 2210633				223926.1.peg.2948
Clostridium_bifermentans_ATCC_19299	Clostridium bifermentans ATCC 19299				Unknown
Citrobacter_amalonaticus_Y19	Citrobacter amalonaticus Y19				g.240294.CDS.750
Kandleria_vitulina_DSM_20405	Kandleria vitulina DSM 20405				Unknown
Tatumella_ptyseos_ATCC_33301	Tatumella ptyseos ATCC 33301				g.206562.CDS.900
Clostridium_clariflavum_DSM_19732	Clostridium clariflavum DSM 19732				g.27460.CDS.871
Neisseria_cinerea_ATCC_14685	Neisseria cinerea ATCC 14685				546262.4.peg.466
Ureaplasma_parvum_serovar_1_str_ATCC_27813	Ureaplasma parvum serovar 1 str. ATCC 27813				Unknown
Paenibacillus_alvei_DSM_29	Paenibacillus alvei DSM 29				1206781.3.peg.1695 and 1206781.3.peg.2832
Stoquefichus_massiliensis_AP9	Stoquefichus massiliensis AP9				Unknown
Clostridium_botulinum_Bf	Clostridium botulinum Bf				Unknown
Methyloversatilis_universalis_Fam50001	Methyloversatilis universalis Fam50001				g.216519.CDS.2100
Bacillus_flexus_27Col1_1E	Bacillus flexus 27Col1.1E				Unknown
Vibrio_furnissii_NCTC_11218	Vibrio furnissii NCTC 11218				903510.3.peg.452
Clostridium_sticklandii_DSM_519	Clostridium sticklandii DSM 519				Unknown
Afipia_birgiae_34632	Afipia birgiae 34632				1197906.5.peg.298
Acinetobacter_lwoffii_WJ10621	Acinetobacter lwoffii WJ10621				1046625.3.peg.2549
Alistipes_finegoldii_DSM_17242	Alistipes finegoldii DSM 17242				679935.3.peg.3102
Aeromonas_hydrophila_subsp_hydrophila_ATCC_7966	Aeromonas hydrophila subsp. hydrophila ATCC 7966				380703.5.peg.166
Enterococcus_caccae_ATCC_BAA_1240	Enterococcus caccae ATCC BAA-1240				Unknown
Megamonas_funiformis_YIT_11815	Megamonas funiformis YIT 11815				g.27486.CDS.1703
Enterococcus_gallinarum_EG2	Enterococcus gallinarum EG2				Unknown
Yersinia_rohdei_ATCC_43380	Yersinia rohdei ATCC 43380				527004.3.peg.2952
Bacillus_atrophaeus_ATCC_49822_1	Bacillus atrophaeus ATCC 49822-1				Unknown
Cloacibacillus_evryensis_DSM_19522	Cloacibacillus evryensis DSM 19522				Unknown
Parabacteroides_goldsteinii_dnLKV18	Parabacteroides goldsteinii dnLKV18				Unknown
Enterococcus_saccharolyticus_DSM8903	Enterococcus saccharolyticus DSM8903				Unknown
Clostridium_botulinum_F_str_230613	Clostridium botulinum F str. 230613				Unknown
Kluyvera_ascorbata_ATCC_33433	Kluyvera ascorbata ATCC 33433				g.241367.CDS.4039 and g.241367.CDS.3205
Staphylococcus_arlettae_CVD059	Staphylococcus arlettae CVD059				Unknown
Acinetobacter_radioresistens_NIPH_2130	Acinetobacter radioresistens NIPH 2130				1217674.3.peg.618
Raoultella_planticola_ATCC_33531	Raoultella planticola ATCC 33531				g.242501.CDS.31
Prevotella_brevis_ATCC_19188	Prevotella brevis ATCC 19188				Unknown
Clostridium_clostridioforme_CM201	Clostridium clostridioforme CM201				Unknown
Prevotella_albensis_DSM_11370	Prevotella albensis DSM 11370				Unknown
Staphylococcus_xylosus_DMB3_Bh1	Staphylococcus xylosus DMB3-Bh1				Unknown
Ochrobactrum_anthropi_ATCC_49188	Ochrobactrum anthropi ATCC 49188				439375.7.peg.567
Neisseria_macacae_ATCC_33926	Neisseria macacae ATCC 33926				g.28897.CDS.455
Gemella_sanguinis_ATCC700632	Gemella sanguinis ATCC700632				Unknown
Arcobacter_butzleri_RM4018	Arcobacter butzleri RM4018				Unknown
Eikenella_corrodens_ATCC_23834	Eikenella corrodens ATCC 23834				546274.4.peg.369
Haemophilus_parainfluenzae_T3T1	Haemophilus parainfluenzae T3T1				Unknown
Clostridium_innocuum_2959	Clostridium innocuum 2959				Unknown
Staphylococcus_pettenkoferi_VCU012	Staphylococcus pettenkoferi VCU012				Unknown
Pseudomonas_nitroreducens_HBP1	Pseudomonas nitroreducens HBP1				g.214879.CDS.933
Enterococcus_casseliflavus_ATCC_12755	Enterococcus casseliflavus ATCC 12755				Unknown
Paraprevotella_clara_YIT_11840	Paraprevotella clara YIT 11840				Unknown
Alistipes_onderdonkii_DSM_19147	Alistipes onderdonkii DSM 19147				1120974.3.peg.1884
Trabulsiella_guamensis_ATCC_49490	Trabulsiella guamensis ATCC 49490				g.244739.CDS.2396
Acinetobacter_pittii_ANC_4052	Acinetobacter pittii ANC 4052				1217689.3.peg.3335
Yersinia_bercovieri_ATCC_43970	Yersinia bercovieri ATCC 43970				349968.3.peg.2411
Clostridium_indolis_DSM_755	Clostridium indolis DSM 755				g.209340.CDS.1876
Actinobacillus_pleuropneumoniae_L20	Actinobacillus pleuropneumoniae L20				416269.5.peg.788
Ureibacillus_thermosphaericus_str_Thermo_BF	Ureibacillus thermosphaericus str. Thermo-BF				Unknown
Yersinia_enterocolitica_subsp_enterocolitica_8081	Yersinia enterocolitica subsp. enterocolitica 8081				393305.7.peg.4109
Bacillus_sonorensis_L12	Bacillus sonorensis L12				Unknown
Cetobacterium_somerae_ATCC_BAA_47401	Cetobacterium somerae ATCC BAA-47401				Unknown
Neisseria_flavescens_SK114	Neisseria flavescens SK114				596320.3.peg.1166
Neisseria_subflava_NJ9703	Neisseria subflava NJ9703				546268.4.peg.1257
Acinetobacter_johnsonii_SH046	Acinetobacter johnsonii SH046				575586.4.peg.1166
Parasutterella_excrementihominis_YIT_11859	Parasutterella excrementihominis YIT 11859				Unknown
Clostridium_symbiosum_ATCC_14940	Clostridium symbiosum ATCC 14940				Unknown
Vibrio_fluvialis_560	Vibrio fluvialis 560				g.244760.CDS.2607
Lysinibacillus_fusiformis_ZB2	Lysinibacillus fusiformis ZB2				Unknown
Staphylococcus_capitis_QN1	Staphylococcus capitis QN1				Unknown
Campylobacter_showae_CSUNSWCD	Campylobacter showae CSUNSWCD				1244083.3.peg.1532
Brochothrix_thermosphacta_DSM_20171	Brochothrix thermosphacta DSM 20171 = FSL F6-1036				Unknown
Pseudomonas_monteilii_NBRC_103158	Pseudomonas monteilii NBRC 103158 = DSM 14164				g.242449.CDS.3229
Citrobacter_freundii_ATCC_8090	Citrobacter freundii ATCC 8090 = MTCC 1658				1006003.3.peg.4154
Lactobacillus_coryniformis_subsp_coryniformis_CECT_5711	Lactobacillus coryniformis subsp. coryniformis CECT 5711				Unknown
Cryptobacterium_curtum_DSM_15641	Cryptobacterium curtum DSM 15641				Unknown
Pseudomonas_alcaliphila_34	Pseudomonas alcaliphila 34				1248438.3.peg.1429
Campylobacter_hyointestinalis_subsp_hyointestinalis_LMG_9260	Campylobacter hyointestinalis subsp. hyointestinalis LMG 9260				Unknown
Pseudomonas_oleovorans_MOIL14HWK12	Pseudomonas oleovorans MOIL14HWK12				g.206609.CDS.1832
Clostridium_paraputrificum_AGR2156	Clostridium paraputrificum AGR2156				Unknown
Clostridium_saccharoperbutylacetonicum_N1_4_HMT	Clostridium saccharoperbutylacetonicum N1-4(HMT)				Unknown
Paenibacillus_barengoltzii_G22	Paenibacillus barengoltzii G22				1235795.3.peg.1215 and 1235795.3.peg.3184
Neisseria_elongata_subsp_glycolytica_ATCC_29315	Neisseria elongata subsp. glycolytica ATCC 29315				546263.3.peg.1211
Paenibacillus_lactis_154	Paenibacillus lactis 154				743719.3.peg.2673
Bacillus_mojavensis_RO_H_1	Bacillus mojavensis RO-H-1 = KCTC3706				Unknown
Alistipes_indistinctus_YIT_12060	Alistipes indistinctus YIT 12060				g.27472.CDS.1780
Weissella_cibaria_KACC_11862	Weissella cibaria KACC 11862				Unknown
Blautia_wexlerae_DSM_19850	Blautia wexlerae DSM 19850				Unknown
Aeromonas_veronii_B565	Aeromonas veronii B565				998088.4.peg.3929
Yersinia_frederiksenii_ATCC_33641	Yersinia frederiksenii ATCC 33641				349966.3.peg.3500
Yokenella_regensburgei_ATCC_43003	Yokenella regensburgei ATCC 43003				1002368.3.peg.125
Acinetobacter_haemolyticus_NIPH_261	Acinetobacter haemolyticus NIPH 261				1217986.3.peg.2485
Hafnia_alvei_ATCC_51873	Hafnia alvei ATCC 51873				1002364.3.peg.3429
Methylobacterium_populi_BJ001	Methylobacterium populi BJ001				441620.7.peg.859
Clostridium_viride_DSM_6836	Clostridium viride DSM 6836				Unknown
Clostridium_saccharogumia_DSM_17460	Clostridium saccharogumia DSM 17460				Unknown
Aeromonas_caviae_Ae398	Aeromonas caviae Ae398				878320.4.peg.202
Methylobacterium_mesophilicum_SR1_6_6	Methylobacterium mesophilicum SR1.6/6				908290.3.peg.977
Aneurinibacillus_aneurinilyticus_ATCC_12856	Aneurinibacillus aneurinilyticus ATCC 12856				g.216026.CDS.3023
Escherichia_hermannii_NBRC_105704	Escherichia hermannii NBRC 105704				1115512.3.peg.3878
Enterococcus_hirae_ATCC_9790	Enterococcus hirae ATCC 9790				Unknown
Lautropia_mirabilis_ATCC_51599	Lautropia mirabilis ATCC 51599				887898.3.peg.292
Bacteroides_oleiciplenus_YIT_12058	Bacteroides oleiciplenus YIT 12058				Unknown
Staphylococcus_pasteuri_SP1	Staphylococcus pasteuri SP1				Unknown
Clostridium_beijerinckii_NCIMB_8052	Clostridium beijerinckii NCIMB 8052				Unknown
Staphylococcus_caprae_C87	Staphylococcus caprae C87				Unknown
Candidatus_Nitrososphaera_gargensis_Ga9_2	Candidatus Nitrososphaera gargensis Ga9.2				Unknown
Nevskia_ramosa_DSM_11499	Nevskia ramosa DSM 11499				g.207204.CDS.544
Enterobacter_hormaechei_YT3	Enterobacter hormaechei YT3				g.31510.CDS.1435
Enterococcus_asini_ATCC_700915	Enterococcus asini ATCC 700915				1158606.3.peg.327
Yersinia_kristensenii_ATCC_33638	Yersinia kristensenii ATCC 33638				527012.3.peg.3203
Paraprevotella_xylaniphila_YIT_11841	Paraprevotella xylaniphila YIT 11841				Unknown
Dorea_formicigenerans_ATCC_27755	Dorea formicigenerans ATCC 27755				Unknown
Staphylococcus_simulans_ACS_120_V_Sch1	Staphylococcus simulans ACS-120-V-Sch1				Unknown
Paracoccus_yeei_ATCC_BAA_599	Paracoccus yeei ATCC BAA-599				g.242186.CDS.3272
Coprococcus_catus_GD_7	Coprococcus catus GD/7				Unknown
Haemophilus_haemolyticus_M19501	Haemophilus haemolyticus M19501				Unknown
Pseudobutyrivibrio_ruminis_AD2017	Pseudobutyrivibrio ruminis AD2017				Unknown
Veillonella_ratti_ACS_216_V_Col6b	Veillonella ratti ACS-216-V-Col6b				Unknown
Staphylococcus_lugdunensis_HKU09_01	Staphylococcus lugdunensis HKU09-01				Unknown
Staphylococcus_haemolyticus_JCSC1435	Staphylococcus haemolyticus JCSC1435				Unknown
Morganella_morganii_subsp_morganii_KT	Morganella morganii subsp. morganii KT				1124991.3.peg.3114
Staphylococcus_saprophyticus_subsp_saprophyticus_ATCC_15305	Staphylococcus saprophyticus subsp. saprophyticus ATCC 15305				Unknown
Bacillus_pumilus_ATCC_7061	Bacillus pumilus ATCC 7061				Unknown
Clostridium_methoxybenzovorans_SR3	Clostridium methoxybenzovorans SR3				g.209093.CDS.5361
Clostridium_cadaveris_AGR2141	Clostridium cadaveris AGR2141				Unknown
Staphylococcus_equorum_subsp_equorum_Mu2	Staphylococcus equorum subsp. equorum Mu2				Unknown
Cedecea_davisae_DSM_4568	Cedecea davisae DSM 4568				566551.4.peg.54
Parabacteroides_gordonii_DSM_23371	Parabacteroides gordonii DSM 23371				Unknown
Hafnia_alvei_BIDMC_31	Hafnia alvei BIDMC 31				g.209992.CDS.4187
Desulfovibrio_desulfuricans_subsp_desulfuricans_DSM_642	Desulfovibrio desulfuricans subsp. desulfuricans DSM 642				g.207114.CDS.903
Leminorella_grimontii_ATCC_33999	Leminorella grimontii ATCC 33999 = DSM 5078				g.206563.CDS.3243
Escherichia_albertii_TW07627	Escherichia albertii TW07627				502347.3.peg.328
Enterobacter_asburiae_LF7a	Enterobacter asburiae LF7a				640513.3.peg.426
Ureaplasma_urealyticum_serovar_8_str_ATCC_27618	Ureaplasma urealyticum serovar 8 str. ATCC 27618				Unknown
Grimontia_hollisae_CIP_101886	Grimontia hollisae CIP 101886				675812.3.peg.564
Blautia_obeum_ATCC_29174	Blautia obeum ATCC 29174				Unknown
Haemophilus_sputorum_CCUG_13788	Haemophilus sputorum CCUG 13788				Unknown
Aeromonas_media_WS	Aeromonas media WS				g.239700.CDS.3524
Yersinia_pseudotuberculosis_YPIII	Yersinia pseudotuberculosis YPIII				502800.3.peg.3814
Methylobacterium_radiotolerans_JCM_2831	Methylobacterium radiotolerans JCM 2831				426355.14.peg.5441
Escherichia_albertii_KF1	Escherichia albertii KF1				g.214925.CDS.2091
Bradyrhizobium_elkanii_USDA_76	Bradyrhizobium elkanii USDA 76				398525.3.peg.2804
Escherichia_fergusonii_ATCC_35469	Escherichia fergusonii ATCC 35469				585054.5.peg.3966
Campylobacter_fetus_subsp_fetus_82_40	Campylobacter fetus subsp. fetus 82-40				Unknown
Aeromonas_jandaei_Riv2	Aeromonas jandaei Riv2				g.239699.CDS.3310
Clostridium_botulinum_A_str_ATCC_19397	Clostridium botulinum A str. ATCC 19397				Unknown
Staphylococcus_hominis_subsp_hominis_C80	Staphylococcus hominis subsp. hominis C80				Unknown
Veillonella_dispar_ATCC_17748	Veillonella dispar ATCC 17748				Unknown
Bacillus_altitudinis_41KF2b	Bacillus altitudinis 41KF2b				Unknown
Vibrio_mimicus_MB_451	Vibrio mimicus MB-451				675806.3.peg.2601
Enterobacter_cloacae_EcWSU1	Enterobacter cloacae EcWSU1				1045856.3.peg.246
Clostridium_glycolicum_ATCC_14880	Clostridium glycolicum ATCC 14880 = DSM 1288				Unknown
Lysinibacillus_sphaericus_C3_41	Lysinibacillus sphaericus C3-41				Unknown
Enterobacter_hormaechei_YT2	Enterobacter hormaechei YT2				1259823.3.peg.2628
Plesiomonas_shigelloides_302_73	Plesiomonas shigelloides 302-73				1315976.3.peg.1170
Neisseria_mucosa_ATCC_25996	Neisseria mucosa ATCC 25996				546266.6.peg.2050
Kingella_oralis_ATCC_51147	Kingella oralis ATCC 51147				629741.3.peg.739
Paenibacillus_daejeonensis_DSM_15491	Paenibacillus daejeonensis DSM 15491				1122917.3.peg.4715
Moraxella_catarrhalis_RH4	Moraxella catarrhalis RH4				749219.3.peg.1334
Clostridium_sordellii_ATCC_9714	Clostridium sordellii ATCC 9714				Unknown
Veillonella_atypica_ACS_049_V_Sch6	Veillonella atypica ACS-049-V-Sch6				Unknown
Acinetobacter_calcoaceticus_PHEA_2	Acinetobacter calcoaceticus PHEA-2				871585.3.peg.1836
Sphingomonas_paucimobilis_HER1398	Sphingomonas paucimobilis HER1398				g.210585.CDS.3038
Geobacillus_stearothermophilus_ATCC_7953	Geobacillus stearothermophilus ATCC 7953				Unknown
Streptococcus_pyogenes_MGAS9429	Streptococcus pyogenes MGAS9429				Unknown
Staphylococcus_aureus_subsp_aureus_USA300_FPR3757	Staphylococcus aureus subsp. aureus USA300_FPR3757				Unknown
Ochrobactrum_intermedium_LMG_3301	Ochrobactrum intermedium LMG 3301				641118.3.peg.493
Shigella_dysenteriae_Sd197	Shigella dysenteriae Sd197				300267.13.peg.5358
Bacillus_amyloliquefaciens_DSM7	Bacillus amyloliquefaciens DSM7				Unknown
Agrobacterium_tumefaciens_F2	Agrobacterium tumefaciens F2				1050720.3.peg.1250
Dyadobacter_beijingensis_DSM_21582	Dyadobacter beijingensis DSM 21582				Unknown
Bacillus_licheniformis_ATCC_14580	Bacillus licheniformis ATCC 14580				Unknown
Pseudomonas_monteilii_QM	Pseudomonas monteilii QM				1123524.3.peg.1778
Bacillus_subtilis_str_168	Bacillus subtilis str. 168				Unknown
Shigella_flexneri_2002017	Shigella flexneri 2002017				591020.3.peg.4878
Leuconostoc_lactis_KACC_91922	Leuconostoc lactis KACC 91922				Unknown
Pantoea_agglomerans_IG1	Pantoea agglomerans IG1				1110694.4.peg.4385
Vibrio_fluvialis_PG41	Vibrio fluvialis PG41				g.210314.CDS.4447
Schlesneria_paludicola_DSM_18645	Schlesneria paludicola DSM 18645				1123242.3.peg.1776
Mogibacterium_timidum_ATCC_33093	Mogibacterium timidum ATCC 33093				Unknown
Proteus_mirabilis_ATCC_29906	Proteus mirabilis ATCC 29906				525369.4.peg.2592
Streptococcus_equi_subsp_equi_4047	Streptococcus equi subsp. equi 4047				Unknown
Lactococcus_lactis_subsp_lactis_Il1403	Lactococcus lactis subsp. lactis Il1403				Unknown
Acinetobacter_baumannii_AB0057	Acinetobacter baumannii AB0057				480119.5.peg.2682
Pseudomonas_putida_F1	Pseudomonas putida F1				351746.4.peg.5167
Pseudomonas_stutzeri_DSM_4166	Pseudomonas stutzeri DSM 4166				996285.3.peg.488
Pseudomonas_fluorescens_PfO_1	Pseudomonas fluorescens PfO-1				205922.3.peg.4393
Bradyrhizobium_japonicum_USDA_6	Bradyrhizobium japonicum USDA 6				1037409.3.peg.1791
Klebsiella_oxytoca_KCTC_1686	Klebsiella oxytoca KCTC 1686				1006551.4.peg.1661
Comamonas_testosteroni_CNB_2	Comamonas testosteroni CNB-2				688245.4.peg.4685
Vibrio_fluvialis_I21563	Vibrio fluvialis I21563				g.210315.CDS.3090
Haemophilus_influenzae_R2846	Haemophilus influenzae R2846				Unknown
Bacillus_amyloliquefaciens_subsp_amyloliquefaciens_DC_12	Bacillus amyloliquefaciens subsp. amyloliquefaciens DC-12				Unknown
Mesorhizobium_loti_MAFF303099	Mesorhizobium loti MAFF303099				266835.1.peg.5860
Shigella_sonnei_Ss046	Shigella sonnei Ss046				300269.11.peg.4852
Clostridium_acetobutylicum_ATCC_824	Clostridium acetobutylicum ATCC 824				Unknown

## Sheet: ST3C_KEGG
organism	organism code	HBZOPT	KEGG information
Clostridium baratii	cbv	U729_2100	K03179 4-hydroxybenzoate polyprenyltransferase [EC:2.5.1.39] | (GenBank) ubiA prenyltransferase family protein
Clostridium drakei	cdrk	B9W14_21195	K03179 4-hydroxybenzoate polyprenyltransferase [EC:2.5.1.39] | (GenBank) 4-hydroxybenzoate octaprenyltransferase
Clostridium gasigenes	cgas	J1C67_11320	K03179 4-hydroxybenzoate polyprenyltransferase [EC:2.5.1.39] | (GenBank) UbiA family prenyltransferase
Clostridium isatidis	cia	BEN51_10475	K03179 4-hydroxybenzoate polyprenyltransferase [EC:2.5.1.39] | (GenBank) 4-hydroxybenzoate octaprenyltransferase
Clostridium intestinale	cint	HZF06_23545	K03179 4-hydroxybenzoate polyprenyltransferase [EC:2.5.1.39] | (GenBank) UbiA family prenyltransferase
Clostridium sp. BNL1100	clb	Clo1100_0773	K03179 4-hydroxybenzoate polyprenyltransferase [EC:2.5.1.39] | (GenBank) putative 4-hydroxybenzoate polyprenyltransferase
Clostridium sp. OS1-26	cloo	RCG18_26020	K03179 4-hydroxybenzoate polyprenyltransferase [EC:2.5.1.39] | (GenBank) UbiA-like polyprenyltransferase
Clostridium saccharolyticum WM1	csh	Closa_4255	K03179 4-hydroxybenzoate polyprenyltransferase [EC:2.5.1.39] | (GenBank) 4-hydroxybenzoate polyprenyltransferase
Clostridium scatologenes	csq	CSCA_4739	K03179 4-hydroxybenzoate polyprenyltransferase [EC:2.5.1.39] | (GenBank) 4-hydroxybenzoate polyprenyltransferase
Clostridium tagluense	ctag	LL095_12945	K03179 4-hydroxybenzoate polyprenyltransferase [EC:2.5.1.39] | (GenBank) ubiA; putative 4-hydroxybenzoate polyprenyltransferase
Escherichia coli ABU 83972	eab	ECABU_c45640	K03179 4-hydroxybenzoate polyprenyltransferase [EC:2.5.1.39] | (GenBank) ubiA; 4-hydroxybenzoate-octaprenyltransferase
Escherichia albertii	eal	EAKF1_ch1874c	K03179 4-hydroxybenzoate polyprenyltransferase [EC:2.5.1.39] | (GenBank) ubiA; 4-hydroxybenzoate octaprenyltransferase
Escherichia coli BL21-Gold(DE3)pLysS AG	ebd	ECBD_3993	K03179 4-hydroxybenzoate polyprenyltransferase [EC:2.5.1.39] | (GenBank) 4-hydroxybenzoate polyprenyl transferase
Escherichia coli BL21(DE3)	ebe	B21_03872	K03179 4-hydroxybenzoate polyprenyltransferase [EC:2.5.1.39] | (GenBank) ubiA; 4-hydroxybenzoate octaprenyltransferase
Escherichia coli BL21(DE3)	ebl	ECD_03912	K03179 4-hydroxybenzoate polyprenyltransferase [EC:2.5.1.39] | (GenBank) ubiA; p-hydroxybenzoate octaprenyltransferase
Escherichia coli B REL606	ebr	ECB_03912	K03179 4-hydroxybenzoate polyprenyltransferase [EC:2.5.1.39] | (GenBank) ubiA; 4-hydroxybenzoate octaprenyltransferase
Escherichia coli K-12 BW2952	ebw	BWG_3753	K03179 4-hydroxybenzoate polyprenyltransferase [EC:2.5.1.39] | (GenBank) ubiA; p-hydroxybenzoate octaprenyltransferase
Escherichia coli O6:K2:H1 CFT073 (UPEC)	ecc	c5010	K03179 4-hydroxybenzoate polyprenyltransferase [EC:2.5.1.39] | (GenBank) ubiA; 4-hydroxybenzoate octaprenyltransferase
Escherichia coli K-12 DH10B	ecd	ECDH10B_4229	K03179 4-hydroxybenzoate polyprenyltransferase [EC:2.5.1.39] | (GenBank) ubiA; p-hydroxybenzoate octaprenyltransferase
Escherichia coli O157:H7 EDL933 (EHEC)	ece	Z5639	K03179 4-hydroxybenzoate polyprenyltransferase [EC:2.5.1.39] | (GenBank) ubiA; 4-hydroxybenzoate-octaprenyltransferase
Escherichia coli O157:H7 EC4115 (EHEC)	ecf	ECH74115_5521	K03179 4-hydroxybenzoate polyprenyltransferase [EC:2.5.1.39] | (GenBank) ubiA; 4-hydroxybenzoate polyprenyl transferase
Escherichia coli O127:H6 E2348/69 (EPEC)	ecg	E2348C_4355	K03179 4-hydroxybenzoate polyprenyltransferase [EC:2.5.1.39] | (GenBank) ubiA; p-hydroxybenzoate octaprenyltransferase
Escherichia coli O18:K1:H7 UTI89 (UPEC)	eci	UTI89_C4610	K03179 4-hydroxybenzoate polyprenyltransferase [EC:2.5.1.39] | (GenBank) ubiA; 4-hydroxybenzoate-octaprenyltransferase
Escherichia coli K-12 W3110	ecj	JW4000	K03179 4-hydroxybenzoate polyprenyltransferase [EC:2.5.1.39] | (GenBank) ubiA; p-hydroxybenzoate octaprenyltransferase
Escherichia coli 55989 (EAEC)	eck	EC55989_4532	K03179 4-hydroxybenzoate polyprenyltransferase [EC:2.5.1.39] | (GenBank) ubiA; p-hydroxybenzoate octaprenyltransferase
Escherichia coli ATCC 8739	ecl	EcolC_3988	K03179 4-hydroxybenzoate polyprenyltransferase [EC:2.5.1.39] | (GenBank) 4-hydroxybenzoate polyprenyl transferase
Escherichia coli SMS-3-5 (environmental)	ecm	EcSMS35_4502	K03179 4-hydroxybenzoate polyprenyltransferase [EC:2.5.1.39] | (GenBank) ubiA; 4-hydroxybenzoate polyprenyl transferase
Escherichia coli K-12 MG1655	eco	b4040	K03179 4-hydroxybenzoate polyprenyltransferase [EC:2.5.1.39] | (RefSeq) ubiA; 4-hydroxybenzoate octaprenyltransferase
Escherichia coli APEC O78 (APEC)	ecoa	APECO78_01020	K03179 4-hydroxybenzoate polyprenyltransferase [EC:2.5.1.39] | (GenBank) ubiA; 4-hydroxybenzoate octaprenyltransferase
Escherichia coli B C3029	ecob	C3029_01855	K03179 4-hydroxybenzoate polyprenyltransferase [EC:2.5.1.39] | (GenBank) ubiA; 4-hydroxybenzoate octaprenyltransferase
Escherichia coli K-12 C3026	ecoc	C3026_21835	K03179 4-hydroxybenzoate polyprenyltransferase [EC:2.5.1.39] | (GenBank) ubiA; 4-hydroxybenzoate octaprenyltransferase
Escherichia coli O145:H28 RM13516 (EHEC)	ecoh	ECRM13516_4912	K03179 4-hydroxybenzoate polyprenyltransferase [EC:2.5.1.39] | (GenBank) ubiA; 4-hydroxybenzoate polyprenyltransferase
Escherichia coli JJ1886	ecoj	P423_22415	K03179 4-hydroxybenzoate polyprenyltransferase [EC:2.5.1.39] | (GenBank) ubiA; 4-hydroxybenzoate polyprenyltransferase
Escherichia coli K-12 MDS42	ecok	ECMDS42_3478	K03179 4-hydroxybenzoate polyprenyltransferase [EC:2.5.1.39] | (GenBank) ubiA; p-hydroxybenzoate octaprenyltransferase
Escherichia coli LY180	ecol	LY180_21225	K03179 4-hydroxybenzoate polyprenyltransferase [EC:2.5.1.39] | (GenBank) ubiA; 4-hydroxybenzoate polyprenyltransferase
Escherichia coli O145:H28 RM13514 (EHEC)	ecoo	ECRM13514_5175	K03179 4-hydroxybenzoate polyprenyltransferase [EC:2.5.1.39] | (GenBank) ubiA; 4-hydroxybenzoate polyprenyltransferase
Escherichia coli O25b:K100:H4-ST131 EC958 (UPEC)	ecos	EC958_4496	K03179 4-hydroxybenzoate polyprenyltransferase [EC:2.5.1.39] | (GenBank) ubiA; 4-hydroxybenzoate-octaprenyltransferase
Escherichia coli O6:K15:H31 536 (UPEC)	ecp	ECP_4257	K03179 4-hydroxybenzoate polyprenyltransferase [EC:2.5.1.39] | (GenBank) 4-hydroxybenzoate octaprenyltransferase
Escherichia coli O81 ED1a (commensal)	ecq	ECED1_4755	K03179 4-hydroxybenzoate polyprenyltransferase [EC:2.5.1.39] | (GenBank) ubiA; p-hydroxybenzoate octaprenyltransferase
Escherichia coli O8 IAI1 (commensal)	ecr	ECIAI1_4270	K03179 4-hydroxybenzoate polyprenyltransferase [EC:2.5.1.39] | (GenBank) ubiA; p-hydroxybenzoate octaprenyltransferase
Escherichia coli O157:H7 Sakai (EHEC)	ecs	Ecs_5023	K03179 4-hydroxybenzoate polyprenyltransferase [EC:2.5.1.39] | (RefSeq) ubiA; 4-hydroxybenzoate-octaprenyltransferase
Escherichia coli O7:K1 IAI39 (ExPEC)	ect	ECIAI39_4461	K03179 4-hydroxybenzoate polyprenyltransferase [EC:2.5.1.39] | (GenBank) ubiA; p-hydroxybenzoate octaprenyltransferase
Escherichia coli APEC O1 (APEC)	ecv	APECO1_2429	K03179 4-hydroxybenzoate polyprenyltransferase [EC:2.5.1.39] | (GenBank) ubiA; 4-hydroxybenzoate-octaprenyltransferase
Escherichia coli O139:H28 E24377A (ETEC)	ecw	EcE24377A_4593	K03179 4-hydroxybenzoate polyprenyltransferase [EC:2.5.1.39] | (GenBank) ubiA; 4-hydroxybenzoate polyprenyl transferase
Escherichia coli O152:H28 SE11 (commensal)	ecy	ECSE_4332	K03179 4-hydroxybenzoate polyprenyltransferase [EC:2.5.1.39] | (GenBank) 4-hydroxybenzoate-octaprenyltransferase
Escherichia coli O45:K1:H7 S88 (ExPEC)	ecz	ECS88_4513	K03179 4-hydroxybenzoate polyprenyltransferase [EC:2.5.1.39] | (GenBank) ubiA; p-hydroxybenzoate octaprenyltransferase
Escherichia coli DH1	edh	EcDH1_3953	K03179 4-hydroxybenzoate polyprenyltransferase [EC:2.5.1.39] | (GenBank) 4-hydroxybenzoate polyprenyl transferase
Escherichia coli K-12 W3110	ecj	JW4000	K03179 4-hydroxybenzoate polyprenyltransferase [EC:2.5.1.39] | (GenBank) ubiA; p-hydroxybenzoate octaprenyltransferase
Escherichia fergusonii	efe	EFER_4131	K03179 4-hydroxybenzoate polyprenyltransferase [EC:2.5.1.39] | (GenBank) ubiA
Escherichia coli O18:K1:H7 IHE3034 (ExPEC)	eih	ECOK1_4527	K03179 4-hydroxybenzoate polyprenyltransferase [EC:2.5.1.39] | (GenBank) ubiA; 4-hydroxybenzoate polyprenyl transferase
Escherichia coli KO11FL	ekf	KO11_02160	K03179 4-hydroxybenzoate polyprenyltransferase [EC:2.5.1.39] | (GenBank) ubiA; 4-hydroxybenzoate octaprenyltransferase
Escherichia coli clone D i14	elc	i14_4595	K03179 4-hydroxybenzoate polyprenyltransferase [EC:2.5.1.39] | (GenBank) ubiA; 4-hydroxybenzoate octaprenyltransferase
Escherichia coli clone D i2	eld	i02_4595	K03179 4-hydroxybenzoate polyprenyltransferase [EC:2.5.1.39] | (GenBank) ubiA; 4-hydroxybenzoate octaprenyltransferase
Escherichia coli LF82	elf	LF82_2346	K03179 4-hydroxybenzoate polyprenyltransferase [EC:2.5.1.39] | (GenBank) ubiA; 4-hydroxybenzoate octaprenyltransferase
Escherichia coli O78:H11:K80 H10407 (ETEC)	elh	ETEC_4295	K03179 4-hydroxybenzoate polyprenyltransferase [EC:2.5.1.39] | (GenBank) 4-hydroxybenzoate octaprenyltransferase
Escherichia coli W	ell	WFL_21425	K03179 4-hydroxybenzoate polyprenyltransferase [EC:2.5.1.39] | (GenBank) ubiA; 4-hydroxybenzoate octaprenyltransferase
Escherichia coli O83:H1 NRG 857C (AIEC)	eln	NRG857_20190	K03179 4-hydroxybenzoate polyprenyltransferase [EC:2.5.1.39] | (GenBank) ubiA; 4-hydroxybenzoate octaprenyltransferase
Escherichia coli O44:H18 042 (EAEC)	elo	EC042_4409	K03179 4-hydroxybenzoate polyprenyltransferase [EC:2.5.1.39] | (GenBank) ubiA; 4-hydroxybenzoate octaprenyltransferase
Escherichia coli P12b	elp	P12B_c4147	K03179 4-hydroxybenzoate polyprenyltransferase [EC:2.5.1.39] | (GenBank) ubiA; 4-hydroxybenzoate octaprenyltransferase
Escherichia coli O55:H7 RM12579 (EPEC)	elr	ECO55CA74_23295	K03179 4-hydroxybenzoate polyprenyltransferase [EC:2.5.1.39] | (GenBank) ubiA; 4-hydroxybenzoate octaprenyltransferase
Escherichia coli UM146	elu	UM146_20315	K03179 4-hydroxybenzoate polyprenyltransferase [EC:2.5.1.39] | (GenBank) ubiA; 4-hydroxybenzoate octaprenyltransferase
Escherichia coli W	elw	ECW_m4406	K03179 4-hydroxybenzoate polyprenyltransferase [EC:2.5.1.39] | (GenBank) ubiA; p-hydroxybenzoate octaprenyltransferase
Escherichia coli O157:H7 Xuzhou21 (EHEC)	elx	CDCO157_4706	K03179 4-hydroxybenzoate polyprenyltransferase [EC:2.5.1.39] | (GenBank) ubiA; 4-hydroxybenzoate octaprenyltransferase
Escherichia marmotae	ema	C1192_18525	K03179 4-hydroxybenzoate polyprenyltransferase [EC:2.5.1.39] | (GenBank) ubiA; 4-hydroxybenzoate octaprenyltransferase
Escherichia coli NA114 (UPEC)	ena	ECNA114_4197	K03179 4-hydroxybenzoate polyprenyltransferase [EC:2.5.1.39] | (GenBank) ubiA; 4-hydroxybenzoate polyprenyltransferase
Escherichia coli O7:K1 CE10	eoc	CE10_4754	K03179 4-hydroxybenzoate polyprenyltransferase [EC:2.5.1.39] | (GenBank) ubiA; p-hydroxybenzoate octaprenyltransferase
Escherichia coli O103:H2 12009 (EHEC)	eoh	ECO103_4789	K03179 4-hydroxybenzoate polyprenyltransferase [EC:2.5.1.39] | (GenBank) ubiA; p-hydroxybenzoate octaprenyltransferase
Escherichia coli O111:H- 11128 (EHEC)	eoi	ECO111_4863	K03179 4-hydroxybenzoate polyprenyltransferase [EC:2.5.1.39] | (GenBank) ubiA; p-hydroxybenzoate octaprenyltransferase
Escherichia coli O26:H11 11368 (EHEC)	eoj	ECO26_5156	K03179 4-hydroxybenzoate polyprenyltransferase [EC:2.5.1.39] | (GenBank) ubiA; p-hydroxybenzoate octaprenyltransferase
Escherichia coli O55:H7 CB9615 (EPEC)	eok	G2583_4865	K03179 4-hydroxybenzoate polyprenyltransferase [EC:2.5.1.39] | (GenBank) ubiA; 4-hydroxybenzoate octaprenyltransferase
Escherichia ruysiae	eruy	OSH18_14640	K03179 4-hydroxybenzoate polyprenyltransferase [EC:2.5.1.39] | (GenBank) ubiA; 4-hydroxybenzoate octaprenyltransferase
Escherichia coli O150:H5 SE15 (commensal)	ese	ECSF_3896	K03179 4-hydroxybenzoate polyprenyltransferase [EC:2.5.1.39] | (GenBank) 4-hydroxybenzoate-octaprenyltransferase
Escherichia sp. F1	esf	ACK8NJ_22070	K03179 4-hydroxybenzoate polyprenyltransferase [EC:2.5.1.39] | ubiA; (GenBank) 4-hydroxybenzoate octaprenyltransferase
Escherichia coli O104:H4 2011C-3493 (EAEC)	esl	O3K_23655	K03179 4-hydroxybenzoate polyprenyltransferase [EC:2.5.1.39] | (GenBank) ubiA; 4-hydroxybenzoate octaprenyltransferase
Escherichia coli O104:H4 2009EL-2050 (EAEC)	esm	O3M_23575	K03179 4-hydroxybenzoate polyprenyltransferase [EC:2.5.1.39] | (GenBank) ubiA; 4-hydroxybenzoate octaprenyltransferase
Escherichia coli O104:H4 2009EL-2071 (EAEC)	eso	O3O_01700	K03179 4-hydroxybenzoate polyprenyltransferase [EC:2.5.1.39] | (GenBank) ubiA; 4-hydroxybenzoate octaprenyltransferase
Escherichia sp. E4742	esz	FEM44_12075	K03179 4-hydroxybenzoate polyprenyltransferase [EC:2.5.1.39] | (GenBank) 4-hydroxybenzoate octaprenyltransferase
Escherichia coli O157:H7 TW14359 (EHEC)	etw	ECSP_5118	K03179 4-hydroxybenzoate polyprenyltransferase [EC:2.5.1.39] | (GenBank) ubiA; p-hydroxybenzoate octaprenyltransferase
Escherichia coli O17:K52:H18 UMN026 (ExPEC)	eum	ECUMN_4574	K03179 4-hydroxybenzoate polyprenyltransferase [EC:2.5.1.39] | (GenBank) ubiA; p-hydroxybenzoate octaprenyltransferase
Escherichia coli UMNK88 (ETEC, porcine)	eun	UMNK88_4896	K03179 4-hydroxybenzoate polyprenyltransferase [EC:2.5.1.39] | (GenBank) ubiA; 4-hydroxybenzoate polyprenyl transferase UbiA
Haemophilus ducreyi	hdu	HD_1647	K03179 4-hydroxybenzoate polyprenyltransferase [EC:2.5.1.39] | (GenBank) ubiA; 4-hydroxybenzoate octaprenyltransferase
Neisseria animaloris	nani	NCTC12227_00392	K03179 4-hydroxybenzoate polyprenyltransferase [EC:2.5.1.39] | (GenBank) ubiA; 4-hydroxybenzoate octaprenyltransferase
Neisseria animalis	naq	D0T90_08045	K03179 4-hydroxybenzoate polyprenyltransferase [EC:2.5.1.39] | (GenBank) 4-hydroxybenzoate octaprenyltransferase
Neisseria arctica	naw	LVJ86_02700	K03179 4-hydroxybenzoate polyprenyltransferase [EC:2.5.1.39] | (GenBank) ubiA; 4-hydroxybenzoate octaprenyltransferase
Neisseria bacilliformis	nbc	H3L91_08905	K03179 4-hydroxybenzoate polyprenyltransferase [EC:2.5.1.39] | (GenBank) ubiA; 4-hydroxybenzoate octaprenyltransferase
Neisseria brasiliensis	nbl	GJV52_00045	K03179 4-hydroxybenzoate polyprenyltransferase [EC:2.5.1.39] | (GenBank) 4-hydroxybenzoate octaprenyltransferase
Neisseria canis	nci	NCTC10296_02259	K03179 4-hydroxybenzoate polyprenyltransferase [EC:2.5.1.39] | (GenBank) ubiA; 4-hydroxybenzoate octaprenyltransferase
Neisseria cinerea	ncz	NCTC10294_00374	K03179 4-hydroxybenzoate polyprenyltransferase [EC:2.5.1.39] | (GenBank) ubiA; 4-hydroxybenzoate octaprenyltransferase
Neisseria dentiae	ndn	H3L92_06210	K03179 4-hydroxybenzoate polyprenyltransferase [EC:2.5.1.39] | (GenBank) ubiA; 4-hydroxybenzoate octaprenyltransferase
Neisseria dumasiana	ndu	LVJ88_02530	K03179 4-hydroxybenzoate polyprenyltransferase [EC:2.5.1.39] | (GenBank) ubiA; 4-hydroxybenzoate octaprenyltransferase
Neisseria chenwenguii	nei	BG910_10920	K03179 4-hydroxybenzoate polyprenyltransferase [EC:2.5.1.39] | (GenBank) 4-hydroxybenzoate polyprenyltransferase
Neisseria sp. KEM232	nek	CGZ77_03580	K03179 4-hydroxybenzoate polyprenyltransferase [EC:2.5.1.39] | (GenBank) 4-hydroxybenzoate polyprenyltransferase
Neisseria elongata	nel	NELON_03355	K03179 4-hydroxybenzoate polyprenyltransferase [EC:2.5.1.39] | (GenBank) 4-hydroxybenzoate polyprenyltransferase
Neisseria flavescens	nfv	FAH67_05790	K03179 4-hydroxybenzoate polyprenyltransferase [EC:2.5.1.39] | (GenBank) 4-hydroxybenzoate octaprenyltransferase
Neisseria gonorrhoeae NCCP11945	ngk	NGK_0460	K03179 4-hydroxybenzoate polyprenyltransferase [EC:2.5.1.39] | (GenBank) putative 4-hydroxybenzoate octaprenyltransferase
Neisseria gonorrhoeae FA 1090	ngo	NGO_0312	K03179 4-hydroxybenzoate polyprenyltransferase [EC:2.5.1.39] | (GenBank) 4-hydroxybenzoate polyprenyltransferase
Neisseria lactamica	nla	NLA_14990	K03179 4-hydroxybenzoate polyprenyltransferase [EC:2.5.1.39] | (GenBank) ubiA; putative 4-hydroxybenzoate octaprenyltransferase
Neisseria leonii	nln	ORY85_09855	K03179 4-hydroxybenzoate polyprenyltransferase [EC:2.5.1.39] | ubiA; (GenBank) 4-hydroxybenzoate octaprenyltransferase
Neisseria lisongii	nls	PJU73_01800	K03179 4-hydroxybenzoate polyprenyltransferase [EC:2.5.1.39] | (GenBank) ubiA; 4-hydroxybenzoate octaprenyltransferase
Neisseria meningitidis Z2491 (serogroup A)	nma	NMA0945	K03179 4-hydroxybenzoate polyprenyltransferase [EC:2.5.1.39] | (GenBank) putative 4-hydroxybenzoate octaprenyltransferase
Neisseria macacae	nmb	MON40_10205	K03179 4-hydroxybenzoate polyprenyltransferase [EC:2.5.1.39] | (GenBank) ubiA; 4-hydroxybenzoate octaprenyltransferase
Neisseria meningitidis FAM18 (serogroup C)	nmc	NMC0688	K03179 4-hydroxybenzoate polyprenyltransferase [EC:2.5.1.39] | (GenBank) ubiA; putative 4-hydroxybenzoate octaprenyltransferase
Neisseria meningitidis G2136 (serogroup B)	nmd	NMBG2136_0685	K03179 4-hydroxybenzoate polyprenyltransferase [EC:2.5.1.39] | (GenBank) ubiA; 4-hydroxybenzoate polyprenyl transferase
Neisseria meningitidis MC58 (serogroup B)	nme	NMB0735	K03179 4-hydroxybenzoate polyprenyltransferase [EC:2.5.1.39] | (GenBank) ubiA; 4-hydroxybenzoate octaprenyltransferase
Neisseria meningitidis H44/76 (serogroup B)	nmh	NMBH4476_1451	K03179 4-hydroxybenzoate polyprenyltransferase [EC:2.5.1.39] | (GenBank) ubiA; 4-hydroxybenzoate polyprenyl transferase
Neisseria meningitidis alpha14 (cnl strain)	nmi	NMO_0625	K03179 4-hydroxybenzoate polyprenyltransferase [EC:2.5.1.39] | (GenBank) ubiA; 4-hydroxybenzoate octaprenyltransferase
Neisseria mucosa ATCC 19696	nmj	NM96_07360	K03179 4-hydroxybenzoate polyprenyltransferase [EC:2.5.1.39] | (GenBank) 4-hydroxybenzoate octaprenyltransferase
Neisseria meningitidis M01-240149 (serogroup B)	nmm	NMBM01240149_1354	K03179 4-hydroxybenzoate polyprenyltransferase [EC:2.5.1.39] | (GenBank) ubiA; 4-hydroxybenzoate polyprenyl transferase
Neisseria meningitidis 053442 (serogroup C)	nmn	NMCC_0695	K03179 4-hydroxybenzoate polyprenyltransferase [EC:2.5.1.39] | (GenBank) ubiA; 4-hydroxybenzoate octaprenyltransferase
Neisseria meningitidis alpha710 (serogroup B)	nmp	NMBB_0830	K03179 4-hydroxybenzoate polyprenyltransferase [EC:2.5.1.39] | (GenBank) putative 4-hydroxybenzoate octaprenyltransferase
Neisseria meningitidis M04-240196 (serogroup B)	nmq	NMBM04240196_1429	K03179 4-hydroxybenzoate polyprenyltransferase [EC:2.5.1.39] | (GenBank) ubiA; 4-hydroxybenzoate polyprenyl transferase
Neisseria meningitidis M01-240355 (serogroup B)	nms	NMBM01240355_0736	K03179 4-hydroxybenzoate polyprenyltransferase [EC:2.5.1.39] | (GenBank) ubiA; 4-hydroxybenzoate polyprenyl transferase
Neisseria meningitidis 8013 (serogroup C)	nmt	NMV_1664	K03179 4-hydroxybenzoate polyprenyltransferase [EC:2.5.1.39] | (GenBank) ubiA; 4-hydroxybenzoate octaprenyltransferase (4-HB polyprenyltransferase)
Neisseria musculi	nmus	H7A79_1547	K03179 4-hydroxybenzoate polyprenyltransferase [EC:2.5.1.39] | (GenBank) ubiA; 4-hydroxybenzoate polyprenyl transferase
Neisseria meningitidis WUE 2594 (serogroup A)	nmw	NMAA_0568	K03179 4-hydroxybenzoate polyprenyltransferase [EC:2.5.1.39] | (GenBank) ubiA; 4-hydroxybenzoate octaprenyltransferase
Neisseria meningitidis 510612 (serogroup A)	nmx	NMA510612_1055	K03179 4-hydroxybenzoate polyprenyltransferase [EC:2.5.1.39] | (GenBank) ubiA; 4-hydroxybenzoate octaprenyltransferase
Neisseria meningitidis NZ-05/33 (serogroup B)	nmz	NMBNZ0533_0785	K03179 4-hydroxybenzoate polyprenyltransferase [EC:2.5.1.39] | (GenBank) ubiA; 4-hydroxybenzoate polyprenyl transferase
Neisseria perflava	npf	LPB400_08885	K03179 4-hydroxybenzoate polyprenyltransferase [EC:2.5.1.39] | (GenBank) ubiA; 4-hydroxybenzoate octaprenyltransferase
Neisseria sicca	nsc	J7445_02210	K03179 4-hydroxybenzoate polyprenyltransferase [EC:2.5.1.39] | (GenBank) ubiA; 4-hydroxybenzoate octaprenyltransferase
Neisseria subflava	nsf	FAH66_05845	K03179 4-hydroxybenzoate polyprenyltransferase [EC:2.5.1.39] | (GenBank) 4-hydroxybenzoate octaprenyltransferase
Neisseria shayeganii	nsg	H3L94_02505	K03179 4-hydroxybenzoate polyprenyltransferase [EC:2.5.1.39] | (GenBank) ubiA; 4-hydroxybenzoate octaprenyltransferase
Neisseria mucosa FDAARGOS_260	nsi	A6J88_12975	K03179 4-hydroxybenzoate polyprenyltransferase [EC:2.5.1.39] | (GenBank) 4-hydroxybenzoate octaprenyltransferase
Neisseria wadsworthii	nwd	3L96_08560	K03179 4-hydroxybenzoate polyprenyltransferase [EC:2.5.1.39] | (GenBank) ubiA; 4-hydroxybenzoate octaprenyltransferase
Neisseria weaveri	nwe	SAMEA3174300_0150	K03179 4-hydroxybenzoate polyprenyltransferase [EC:2.5.1.39] | (GenBank) ubiA; 4-hydroxybenzoate octaprenyltransferase
Neisseria weixii	nwx	CGZ65_07960	K03179 4-hydroxybenzoate polyprenyltransferase [EC:2.5.1.39] | (GenBank) 4-hydroxybenzoate octaprenyltransferase
Neisseria zalophi	nzl	D0T92_10010	K03179 4-hydroxybenzoate polyprenyltransferase [EC:2.5.1.39] | (GenBank) 4-hydroxybenzoate octaprenyltransferase
Neisseria zoodegmatis	nzo	SAMEA4504057_0902	K03179 4-hydroxybenzoate polyprenyltransferase [EC:2.5.1.39] | (GenBank) ubiA; 4-hydroxybenzoate octaprenyltransferase

## Sheet: ST4_TRP_metabolic_conversions
ID	Enzymatic_conversion	EC_number	Validation_organism	Reference	UniRef90_Ids**
SRT01	5-hydroxytryptophan_synthesis_II_from_tryptophan	1.14.16.1	Pseudomonas fluorescens¬†RG11	https://doi.org/10.3389/fpls.2016.02068	A0A010SSD6	A0A016UJ96	A0A016XKT2	A0A017HN45	A0A023FKJ2	A0A024HK84	A0A024TCA5	A0A024UAZ5	A0A024UDJ1	A0A026WAH0	A0A031I6D1	A0A031IVV8	A0A031JBG6	A0A031JWX3	A0A034WBG5	A0A037ZG18	A0A058ZCQ1	A0A059DWQ3	A0A059EEQ0	A0A059FAF1	A0A059FF73	A0A059G2J8	A0A061QIM4	A0A061R0L5	A0A062U9P2	A0A062V7A7	A0A063BN77	A0A066UG76	A0A066UJM9	A0A067C4U3	A0A067D8B1	A0A068RZX7	A0A068SM78	A0A068YQP6	A0A069E635	A0A071I986	A0A073JYZ7	A0A074LU63	A0A074M7V2	A0A074N2D9	A0A075AGA0	A0A075AQ38	A0A075FVF6	A0A075GNS2	A0A075NU62
SRT02	Serotonin_from_5-hydroxytryptophan*	4.1.1.28	Lactiplantibacillus plantarum LRCC 5314 (not_validated)	https://doi.org/10.1007/s12275-021-1472-2	A0A016VMX9	A0A017HFK6	A0A021XBL0	A0A023ET86	A0A034VDH2	A0A059E5W6	A0A059E632	A0A060WI79	A0A060WXY8	A0A062X2E6	A0A067RL11	A0A068D5I5	A0A068QPH6	A0A068WY04	A0A068Y0Y8	A0A075BTL4	A0A077CZT1	A0A077Z312	A0A077Z8X3	A0A084G1F7	A0A084VME0	A0A085ME79	A0A085NPB9	A0A085NPD1	A0A087UUV2	A0A087WU57	A0A087WV24	A0A088A3X5	A0A090LCX2	A0A090LSQ6	A0A090QNT0	A0A090QQ09	A0A090W2Z3	A0A091DPL6	A0A091GRK2	A0A091L3Z3	A0A091L7I2	A0A091VNK4	A0A093F5L8	A0A095AG94	A0A095APS5	A0A098LWW0	A0A099Y2F2	A0A0A8VHV7	A0A0B1SW78
IND01	Indol-3-yl-pyruvate_synthesis_from_tryptophan	2.6.1.1	Clostridium sporogenes ATCC 15579	https://doi.org/10.17192/z2014.0116	A0A010RIF3	A0A010SCA7	A0A010SFK8	A0A011QRX9	A0A011RMW1	A0A011TDZ5	A0A011TEC1	A0A011U5X9	A0A011V1C3	A0A016U334	A0A016U433	A0A016W5R6	A0A017H9L4	A0A017HD12	A0A017HDM4	A0A017HDS4	A0A017HR12	A0A017HSL6	A0A017HU85	A0A017HV27	A0A017HVG2	A0A017SKU9	A0A021WW89	A0A021WXJ2	A0A021X3J6	A0A021X6D6	A0A021XBL2	A0A021XDR0	A0A021XFI8	A0A022IQZ8	A0A022PXG1	A0A022Q118	A0A022QPY9	A0A022QRX8	A0A022QZB6	A0A023BBH7	A0A023D259	A0A023D285	A0A023D8D3	A0A023DXB0	A0A023F820	A0A023FBQ6	A0A023X928	A0A024GGV1	A0A024UE29
IND02	Indol-3-yl-lactate_synthesis_from_indol-3-yl-pyruvate	1.1.1.110	Clostridium sporogenes ATCC 15580	https://doi.org/10.17192/z2014.0117	G9EZR6	J7SHB8
IND03	Indol-3-yl-acrylate_synthesis_from_indol-3-yl-lactate	2.8.3.17	Clostridium sporogenes ATCC 15581	https://doi.org/10.17192/z2014.0118	A0A011U2A0	A0A069RDC8	A0A077GCA9	A0A0D5VPU3	A0A0D8FU31	A0A0D8HIC9	A0A0F0C3H4	A0A0F0C717	A0A0F0C8B1	A0A0F0CAT8	A0A0F0CDP3	A0A0F0CF92	A0A0F0KUE4	A0A0F0L2G7	A0A0F2CAU9	A0A0G3IUK1	A0A0H2M188	A0A0H2MAN1	A0A0J6VE21	A0A0J6VEL4	A0A0J6W7P0	A0A0J6WA01	A0A0J8TX38	A0A0J9B8R3	A0A0J9BMF4	A0A0M2HRN5	A0A0M8SZT8	A0A0P0MA70	A0A0P0MG54	A0A0S3PQ39	A0A0S3PT50	A0A0S3PZI3	A0A0S3PZT9	A0A109KQQ4	A0A117ECV3	A0A117EDC4	A0A125NTT2	A0A128EZT6	A0A132BTF4	A0A132BXL6	A0A143XC24	A0A150HAV1	A0A150HG66	A0A160KVX0	A0A161X263
IND04	Indol-3-yl-propanoate_synthesis_from_indol-3-yl-acrylate	1.3.8.15	Clostridium sporogenes ATCC 15582	https://doi.org/10.17192/z2014.0119	A0A1V9IPT0	J7TF92
IND05	Indol-3-yl-acetamide_synthesis_from_tryptophan	1.13.12.3	Pseudomonas savastanoi	https://doi.org/10.1016/S0021-9258(18)99834-0	A0A023D8T8	A0A023XRG7	A0A024HBF2	A0A024HH28	A0A031HR23	A0A031LI64	A0A059DMM6	A0A059FUZ1	A0A059FZE8	A0A059G1U7	A0A059X3T5	A0A060IFS4	A0A062U9B2	A0A062UCH8	A0A062VFX3	A0A062VHV0	A0A063Y2Q7	A0A066PPY5	A0A066RHT8	A0A066RJ78	A0A068R6Y3	A0A069PND2	A0A070A8Z0	A0A074JJF5	A0A077B121	A0A077F4Q4	A0A077FL39	A0A077LCB3	A0A077LDC5	A0A077LMU3	A0A078KXX4	A0A081BFP1	A0A081R8B1	A0A084G022	A0A085F6T3	A0A085FX14	A0A085VRB7	A0A086MGS4	A0A086Y323	A0A086Y782	A0A087MKC5	A0A089NLH0	A0A089NYC6	A0A089WKH1	A0A089WPG6
IND06	Tryptophan_synthesis_from_Indole	4.2.1.122	Escherichia coli K12	¬†doi:¬†10.1093/genetics/52.6.1303	A0A0D0TD47	A0A0E3MRM0	A0A0R3B4S6	A0A0W0I7M3	A0A142BQM2	A0A160HS53	A0A172YWJ2	A0A1B3D474	A0A1B3IR18	A0A1C1WL86	A0A1S7BG39	A0A3B1CP65	A0A3B1CV48	A0A3G7PUD9	A0A3G7TX96	A0A3G7XB52	A0A3G8ARZ9	A0A3G8CZW0	A0A6J4KNX0	A0A6J4PXJ3	C3KAK0	C7EZE1	E3PQK0	I0DHA5
IND07	Indole_synthesis_I_from_tryptophan	4.1.99.1	Escherichia coli¬†MG1655	https://doi.org/10.1099/mic.0.064139-0	A0A017RVR8	A0A022PCT4	A0A059E2T1	A0A060RDT2	A0A062U8W6	A0A068QNG5	A0A069E2P0	A0A072NP82	A0A072WWQ4	A0A075KDU0	A0A076N0X0	A0A077NFC1	A0A077PLI0	A0A083ZZQ2	A0A084Y2L8	A0A085B4E8	A0A088T2D6	A0A089WM96	A0A090IEN6	A0A090ILK7	A0A094IIV9	A0A095XET6	A0A096BIJ8	A0A097AS82	A0A098BZJ5	A0A099KCZ6	A0A099LW35	A0A0A0SBB7	A0A0A1TXI0	A0A0A2FIW3	A0A0B3AEX5	A0A0B5D0V8	A0A0B6TP78	A0A0B7GVV4	A0A0C1Z7U4	A0A0C3MZU5	A0A0C5VI75	A0A0C5WG50	A0A0C7P3S6	A0A0D2J6B5	A0A0D2MC86	A0A0D6B3U3	A0A0D8HMG6	A0A0D8IBL1	A0A0E2H7G7
IND08	Indole_Degradation_I	1.14.13.235	Pseudomonas putida 1290	https://doi.org/10.1007/s10886-013-0324-x	A0A0Q6XZQ7	A0A1H7RGK1	A0A2P1B719	A0A3R2DEQ2	A0A6N8HKP7	A0A9W4L9S2	A0AAJ2B9M8	A0AAW8FG76	A0AAW8G6Z8	B0FXI0	D0C6T7	R9B281
IND09	Tryptamine_synthesis_I_from_tryptophan	4.1.1.25	Clostridium sporogenes ATCC 15579	doi:¬†10.1016/j.chom.2014.09.001	A0A062V6V5	A0A063ZAG8	A0A068QT76	A0A075FPG1	A0A075HAA1	A0A081DCH8	A0A084JZ68	A0A088RWY6	A0A090PWU8	A0A090Q0N0	A0A098EAQ3	A0A099T2P7	A0A0A7FS35	A0A0A7FTB2	A0A0D9V681	A0A0E3KW08	A0A0E3L029	A0A0E3NI85	A0A0E3P0J0	A0A0E3SA16	A0A0E3SSQ8	A0A0E3WWY7	A0A0F7Y7N3	A0A0F9RMY3	A0A0G3VFZ2	A0A0H5D573	A0A0N9LAJ7	A0A0P1H821	A0A0P8E141	A0A0P8XZX4	A0A0Q0VLG7	A0A0Q0ZNV7	A0A0Q1BC58	A0A0R1LJE2	A0A0U2V5X1	A0A101DPP2	A0A101GRV5	A0A101J1D5	A0A125RDN6	A0A126R1R1	A0A139CIW2	A0A139CN86	A0A151AAA5	A0A151AIV1	A0A162FK13
IND09	Tryptamine_synthesis_I_from_tryptophan	4.1.1.28	Clostridium sporogenes ATCC 15579	doi:¬†10.1016/j.chom.2014.09.001	A0A016VMX9	A0A017HFK6	A0A021XBL0	A0A023ET86	A0A034VDH2	A0A059E5W6	A0A059E632	A0A060WI79	A0A060WXY8	A0A062X2E6	A0A067RL11	A0A068D5I5	A0A068QPH6	A0A068WY04	A0A068Y0Y8	A0A075BTL4	A0A077CZT1	A0A077Z312	A0A077Z8X3	A0A084G1F7	A0A084VME0	A0A085ME79	A0A085NPB9	A0A085NPD1	A0A087UUV2	A0A087WU57	A0A087WV24	A0A088A3X5	A0A090LCX2	A0A090LSQ6	A0A090QNT0	A0A090QQ09	A0A090W2Z3	A0A091DPL6	A0A091GRK2	A0A091L3Z3	A0A091L7I2	A0A091VNK4	A0A093F5L8	A0A095AG94	A0A095APS5	A0A098LWW0	A0A099Y2F2	A0A0A8VHV7	A0A0B1SW78
IND09	Tryptamine_synthesis_I_from_tryptophan	4.1.1.105	Mediterranibacter gnavus ATCC 29149	DOI:10.1101/2022.03.05.483098	A0A031FVD4	A0A0A2IDH4	A0A0P8E141	A0A105UFN7	A0A177DLZ2	A0A199XR59	A0A1D3MM22	A0A1R1JCB1	A0A1S8ZXV1	A0A1V2X5U7	A0A1Y0CEF9	A0A286LEZ8	A0A348A4X4	A0A3S0G5X6	A0A4R5YLI0	A0A6A2F5F0	A0A6J4GKL3	A0A6J5F7X0	A0A6J8ETF7	A0A6S7BR07	A0A7C9D7D0	A0A822J7V4	A0A8J4THZ8	A0A916C3T7	A0A916DQR4	A0A916FMI8	A0A916G5C4	A0A916H815	A0A916HMH0	A0A916JLW8	A0A916MMX8	A0A9E6XVF3	A0A9E7C1K7	A0A9E7C254	A0A9N8ML85	A0A9N8MU82	A0A9W4W664	A0AA35IDV8	A0AA48M682	A0AAD4II12	A0AAN0RJZ8	A7B1V0	J7SZ64	P0DPA6	P93082
KYN01	Kynurenine_synthesis_I_from_tryptophan	1.13.11.11	Cupriavidus metallidurans¬†CH34¬†	DOI:¬†10.1016/j.chembiol.2003.11.011	A0A010ZVH8	A0A011UVV4	A0A014P795	A0A016QTM4	A0A016V5P6	A0A016XET9	A0A017HDU7	A0A017HRP0	A0A017T5I8	A0A022MHI8	A0A024P5I7	A0A024QHR8	A0A026W1I7	A0A031HR24	A0A031IFV2	A0A034VM38	A0A059W9T7	A0A060B1N7	A0A060JDL7	A0A060LVN5	A0A061NW15	A0A061P883	A0A061SUK1	A0A062VXW4	A0A063BGA4	A0A066Y695	A0A068SXW5	A0A068YS52	A0A069P093	A0A069PW81	A0A072N9Q6	A0A073IKY0	A0A073J142	A0A073JVA4	A0A074LWC5	A0A074M8A4	A0A074MB89	A0A075FGJ3	A0A075FQ07	A0A075FYS6	A0A075HG82	A0A075HPG8	A0A075IAQ7	A0A075JMB2	A0A075K5M2
KYN01	Kynurenine_synthesis_I_from_tryptophan	1.13.11.52	Cupriavidus metallidurans¬†CH34¬†	DOI:¬†10.1016/j.chembiol.2003.11.011	A0A017S1E3	A0A017STJ7	A0A022VT52	A0A059E4Q7	A0A059IZZ7	A0A059J3X5	A0A060TDF9	A0A061BBU0	A0A061IMK7	A0A072P066	A0A072P227	A0A072PDM4	A0A074WP76	A0A074X5Y3	A0A074YAL3	A0A074YXG4	A0A080WMZ1	A0A091DZC3	A0A093UUN5	A0A093YKM5	A0A093YQE9	A0A094C756	A0A094D7U5	A0A094H425	A0A099P421	A0A0A2IJ39	A0A0A2JUQ0	A0A0A2K0S6	A0A0B7FCR5	A0A0B7FDT2	A0A0B7FGJ0	A0A0C3C563	A0A0C3GWZ1	A0A0C3H7W5	A0A0C3HEV3	A0A0C3HRQ8	A0A0C7NB75	A0A0C9SRW9	A0A0D0E187	A0A0D1X2R2	A0A0D1XXS0	A0A0D1Y178	A0A0D1Y9K5	A0A0D1YK22	A0A0D1YM32
KYN01	Kynurenine_synthesis_I_from_tryptophan	3.5.1.9	Ralstonia metallidurans¬†CH34¬†	DOI:¬†10.1016/j.chembiol.2003.11.011	A0A010Q0J5	A0A010SJM6	A0A014P0S8	A0A016QQC8	A0A016XGB9	A0A017S316	A0A023XLG2	A0A024P3X4	A0A024QIN2	A0A031IE75	A0A031WFU3	A0A059JK56	A0A059KNP5	A0A060IH26	A0A060M130	A0A061APA2	A0A061HX52	A0A061NBT7	A0A061NW48	A0A061P8S4	A0A063BAI2	A0A063C5G9	A0A066S177	A0A066XP85	A0A067QLT8	A0A068YR92	A0A069EVT1	A0A069NQM5	A0A069PVY8	A0A069R9Q0	A0A069RGB3	A0A072NDD0	A0A072NWH9	A0A072VR08	A0A073JT20	A0A073K652	A0A074LMR6	A0A074ME12	A0A074MGX4	A0A074WGB6	A0A074WGJ7	A0A074XLV7	A0A075JSH4	A0A076MKW7	A0A076NSN9
KYN02	Kynurenic_acid_synthesis_I_from_Kynurenine	2.6.1.1	Limosilactobacillus reuteri	https://doi.org/10.1186/s40168-022-01408-7	A0A010RIF3	A0A010SCA7	A0A010SFK8	A0A011QRX9	A0A011RMW1	A0A011TDZ5	A0A011TEC1	A0A011U5X9	A0A011V1C3	A0A016U334	A0A016U433	A0A016W5R6	A0A017H9L4	A0A017HD12	A0A017HDM4	A0A017HDS4	A0A017HR12	A0A017HSL6	A0A017HU85	A0A017HV27	A0A017HVG2	A0A017SKU9	A0A021WW89	A0A021WXJ2	A0A021X3J6	A0A021X6D6	A0A021XBL2	A0A021XDR0	A0A021XFI8	A0A022IQZ8	A0A022PXG1	A0A022Q118	A0A022QPY9	A0A022QRX8	A0A022QZB6	A0A023BBH7	A0A023D259	A0A023D285	A0A023D8D3	A0A023DXB0	A0A023F820	A0A023FBQ6	A0A023X928	A0A024GGV1	A0A024UE29
KYN03	3-hydroxykynurenine_synthesis_from_kynurenine	1.14.13.9	Cytophaga hutchinsonii ATCC 33406	DOI: 10.1016/j.chembiol.2003.11.011	A0A010QZ50	A0A023BSJ3	A0A023F3N1	A0A024FIH5	A0A034W1L3	A0A059VQM6	A0A060T854	A0A061BJ06	A0A061H9Z2	A0A066W439	A0A066WTF7	A0A066X862	A0A067MQT8	A0A067NYR6	A0A067QDQ7	A0A067TGR5	A0A068RMM5	A0A072NU22	A0A074KYP9	A0A074RUL5	A0A074VVG9	A0A075APX3	A0A075HS09	A0A075K047	A0A076HT28	A0A077R2E9	A0A084G8T0	A0A084QNN7	A0A084TI74	A0A084WAA1	A0A085L3H3	A0A085W878	A0A086TAT2	A0A087MMH0	A0A087R9H1	A0A088TKK8	A0A090MZE7	A0A090PWZ7	A0A090VGC6	A0A090VKF9	A0A090W0B2	A0A090X115	A0A091BER2	A0A091BJE4	A0A091BJW6
KYN04	3-hydroxyanthranilate_synthesis_from_3-hydroxykynurenine	3.7.1.3	Cytophaga hutchinsonii ATCC 33407	DOI: 10.1016/j.chembiol.2003.11.011	A0A010RXC9	A0A010RZP4	A0A010T4F6	A0A010Z199	A0A011VPQ0	A0A014MIK8	A0A016QPX5	A0A017H9S2	A0A017HSM2	A0A017SSI4	A0A022IWM3	A0A022VQ87	A0A023BSK4	A0A023NP17	A0A024FH73	A0A024H4H3	A0A024P3H2	A0A024QJC9	A0A024U374	A0A031HY48	A0A031IDS3	A0A033UEU0	A0A044SBV5	A0A058Z440	A0A059E273	A0A059E406	A0A059KN98	A0A059W3Z9	A0A059WPC6	A0A060JGV4	A0A060M2E6	A0A060SKW8	A0A060T340	A0A060ZPS1	A0A061H370	A0A061H697	A0A061J0X6	A0A061NBA6	A0A061NHE6	A0A061NQA0	A0A061QH68	A0A061SUY6	A0A062UE03	A0A063BDY3	A0A063C6D8
KYN05	Quinolinic_acid_synthesis_from_3-hydroxyanthranilate	1.13.11.6	Cytophaga hutchinsonii ATCC 33408	DOI: 10.1016/j.chembiol.2003.11.011	A0A010SD44	A0A015JVQ7	A0A016V3Q3	A0A023BSI6	A0A024EHU2	A0A024FH64	A0A059WW36	A0A060SNW7	A0A060T9I5	A0A060YRD0	A0A061H5P4	A0A061NNR1	A0A061PIE3	A0A066WDG7	A0A066WMI4	A0A067M0T1	A0A067N4U9	A0A067N7V8	A0A067PL20	A0A067STX5	A0A068RL76	A0A072P0I1	A0A074LHT9	A0A074VNZ1	A0A074WTP2	A0A074XV02	A0A074Y4Q6	A0A075B2K8	A0A075HMS2	A0A075K315	A0A076HRM6	A0A077JAL3	A0A081CK02	A0A084QRA8	A0A084TI70	A0A085W875	A0A086TFJ5	A0A087L006	A0A087MMG6	A0A087V4Q0	A0A087Y4E1	A0A090MZK9	A0A090Q1P0	A0A090VW24	A0A090WWM2
KYN06	Quinolinic_acid_synthesis_II	2.6.1.1	Escherichia coli K12	doi:¬†10.1021/acs.biochem.7b00307	A0A010RIF3,A0A010SCA7,A0A010SFK8,A0A011QRX9,A0A011RMW1,A0A011TDZ5,A0A011TEC1,A0A011U5X9,A0A011V1C3,A0A016U334,A0A016U433,A0A016W5R6,A0A017H9L4,A0A017HD12,A0A017HDM4,A0A017HDS4,A0A017HR12,A0A017HSL6,A0A017HU85,A0A017HV27,A0A017HVG2,A0A017SKU9,A0A021WW89,A0A021WXJ2,A0A021X3J6,A0A021X6D6,A0A021XBL2,A0A021XDR0,A0A021XFI8,A0A022IQZ8,A0A022PXG1,A0A022Q118,A0A022QPY9,A0A022QRX8,A0A022QZB6,A0A023BBH7,A0A…
A0A0N5A2Z0	A0A0N5AHA7	A0A0N5AJV4	A0A0N5DC81	A0A0N7F2R9	A0A0N7H8G3	A0A0N7L9E2	A0A0N7LQP0	A0A0N7LU68	A0A0N7LVZ2	A0A0N7M1J1	A0A0N8FTA5	A0A0N8GED5	A0A0N8JUW5	A0A0N8K6N0	A0A0N8KEU8	A0A0N8KGD8	A0A0N8W4F9	A0A0N9I097	A0A0N9N9E6	A0A0N9NCF8	A0A0N9NFA1	A0A0N9NJT6	A0A0N9NJV0	A0A0N9NVV7	A0A0N9NWQ3	A0A0N9UU12	A0A0N9WHI0	A0A0N9YHW2	A0A0N9ZHL6	A0A0N9ZHR0	A0A0N9ZW23	A0A0P0ABB8	A0A0P0AD38	A0A0P0DKV1	A0A0P0EQW8	A0A0P0F1A4	A0A0P0F3M8	A0A0P0F7D6	A0A0P0FSQ5	A0A0P0G3H5	A0A0P0M892	A0A0P0MEX7	A0A0P0NZU8	A0A0P0SAH0	A0A0P0UPS9	A0A0P0YFM8	A0A0P0YHN3	A0A0P0YVK5	A0A0P0YZ33
A0A1G4JUR5	A0A1G4K8H0	A0A1G4K919	A0A1G4KB67	A0A1G4MA93	A0A1G4MEY4	A0A1G4RI09	A0A1G4RSN0	A0A1G4RW79	A0A1G4TYW2	A0A1G5C2Q3	A0A1G5H436	A0A1G5HB28	A0A1G5KXV0	A0A1G5L724	A0A1G5MCB5	A0A1G5MM88	A0A1G5NAV8	A0A1G5NRY9	A0A1G5NX45	A0A1G5P1J6	A0A1G5PY92	A0A1G5Q7T6	A0A1G5RA80	A0A1G5RI04	A0A1G5YPJ6	A0A1G5ZB25	A0A1G6AIR9	A0A1G6D7F4	A0A1G6DTP4	A0A1G6E547	A0A1G6I207	A0A1G6IX63	A0A1G6IXA3	A0A1G6IYT5	A0A1G6K1J0	A0A1G6K2R3	A0A1G6NW02	A0A1G6QBB0	A0A1G6RZ26	A0A1G6SSS0	A0A1G6UK50	A0A1G6WVS0	A0A1G6XAA3	A0A1G6XRI8	A0A1G6XWS9	A0A1G6ZUE3	A0A1G7AGM2	A0A1G7BAU6	A0A1G7CBY9
A0A1X7BQ17	A0A1X7BRI9	A0A1X7BU33	A0A1X7BZH4	A0A1X7D5G1	A0A1X7EWI8	A0A1X7FUS9	A0A1X7GCF7	A0A1X7GKM3	A0A1X7H7I6	A0A1X7I4E7	A0A1X7N024	A0A1X7ND88	A0A1X7NLR0	A0A1X7P9K1	A0A1X7PCP9	A0A1X7PHR5	A0A1X7PMD6	A0A1X7PUA6	A0A1X7QZM8	A0A1X7R006	A0A1X7SFC0	A0A1X7SH25	A0A1X7SKQ8	A0A1X7SKQ9	A0A1X7SM33	A0A1X7TDJ6	A0A1X7TDW1	A0A1X7TI67	A0A1X7UF25	A0A1X7UU54	A0A1X7UUJ7	A0A1X9YDV2	A0A1Y0EA71	A0A1Y0EB63	A0A1Y0EDK1	A0A1Y0EFC0	A0A1Y0N4J2	A0A1Y0V4R8	A0A1Y1HS05	A0A1Y1HST7	A0A1Y1JAP7	A0A1Y1KPD5	A0A1Y1LB57	A0A1Y1LJ96	A0A1Y1N3I4	A0A1Y1UK49	A0A1Y1US89	A0A1Y1USA1	A0A1Y1V3H5
A0A2E7PGX0	A0A2E7PHR9	A0A2E7PJG5	A0A2E7PK80	A0A2E7PKA9	A0A2E7Q6J0	A0A2E7QGW0	A0A2E7QUN5	A0A2E7R5I9	A0A2"
KYN06	Quinolinic_acid_synthesis_II	1.4.3.16	Escherichia coli K12	doi:¬†10.1021/acs.biochem.7b00307	A0A010ZL61,A0A011M065,A0A011NVH2,A0A011PFB9,A0A011UHW0,A0A014DQV3,A0A014NYI1,A0A017H3Y2,A0A017HDF6,A0A017T515,A0A021VSU0,A0A021WY81,A0A022RXM2,A0A023BPM1,A0A023DB80,A0A023WZ53,A0A024GEZ3,A0A024H1P7,A0A024HE37,A0A024JYU9,A0A024P8F4,A0A024QFW9,A0A024QP24,A0A024UFS1,A0A031FRS2,A0A031HSB2,A0A031IGF4,A0A031LP29,A0A031LU24,A0A031MHA6,A0A031WIV8,A0A037ZK26,A0A058ZL44,A0A059ARJ1,A0A059DRL0,A0A059DYY8,A0A…
A0A1B6VK33	A0A1B7KW94	A0A1B7L6L4	A0A1B7LCP2	A0A1B7LY88	A0A1B7VWJ2	A0A1B7XBA6	A0A1B8P1E2	A0A1B8P1F4	A0A1B8QD73	A0A1B8S7I0	A0A1B8TVY0	A0A1B8WFQ5	A0A1B9AVD2	A0A1B9D8B8	A0A1B9F7D0	A0A1B9S4Z3	A0A1B9SHU6	A0A1B9VG71	A0A1C0A8D6	A0A1C0ALL5	A0A1C0B7I4	A0A1C0VV85	A0A1C0YMK2	A0A1C1YW38	A0A1C2BRA8	A0A1C2D9H9	A0A1C2DYV4	A0A1C2E326	A0A1C2G0C4	A0A1C2HNM0	A0A1C2IU21	A0A1C3EIZ2	A0A1C3J9S9	A0A1C3JNT9	A0A1C3JWD6	A0A1C3N9G5	A0A1C3PGV5	A0A1C3RLB6	A0A1C3SGP5	A0A1C3V3H1	A0A1C3Y3G2	A0A1C4FRB6	A0A1C4LZQ5	A0A1C4M7I0	A0A1C4STL8	A0A1C4ZEA6	A0A1C5BES1	A0A1C5CLV4	A0A1C5LDE2
A0A1V1UXR5	A0A1V1W2L5	A0A1V1WX40	A0A1V1ZG69	A0A1V2IBH3	A0A1V2IXB6	A0A1V2NFG4	A0A1V2P3S9	A0A1V2RIN4	A0A1V2ZGN9	A0A1V3A0C4	A0A1V3C7D1	A0A1V3GAC4	A0A1V3GH22	A0A1V3NQA8	A0A1V3NZW4	A0A1V3RYB3	A0A1V3TUT3	A0A1V3WJP4	A0A1V3XEX5	A0A1V4APQ2	A0A1V4AZV8	A0A1V4CC74	A0A1V4H802	A0A1V4HW52	A0A1V4ISY0	A0A1V4ITC0	A0A1V4M010	A0A1V4MG18	A0A1V4MVG4	A0A1V4PVH0	A0A1V4QG60	A0A1V4QKR6	A0A1V4R2K5	A0A1V4R489	A0A1V4R9K4	A0A1V4RN77	A0A1V4S9G6	A0A1V4SEV1	A0A1V4TGZ6	A0A1V4TUG3	A0A1V4VJN6	A0A1V4VRA6	A0A1V4VZ31	A0A1V4W9Y2	A0A1V4WRV9	A0A1V4WZB3	A0A1V4X3J2	A0A1V4XB13	A0A1V4XJ17
A0A2G0CE23	A0A2G1DKX2	A0A2G1LP07	A0A2G1UKE4	A0A2G1XGT5	A0A2G1Y2G9	A0A2G2CKX7	A0A2G2DZF4	A0A2G2G1D0	A0A2G2GC44	A0A2G2HKH5	A0A2G2HXT0	A0A2G2I851	A0A2G2J7Z7	A0A2G2JFR1	A0A2G2LBQ0	A0A2G2LU35	A0A2G2MFL4	A0A2G2N2X1	A0A2G2N4R3	A0A2G2P1V6	A0A2G2PEI8	A0A2G2QD32	A0A2G2QJW5	A0A2G2QRK2	A0A2G3DZG7	A0A2G3EB46	A0A2G3K463	A0A2G3PCM7	A0A2G3PF85	A0A2G4E539	A0A2G4F402	A0A2G4FGV2	A0A2G4FML8	A0A2G4G445	A0A2G4G9U2	A0A2G4GI23	A0A2G4GPH9	A0A2G4H0Z5	A0A2G4H5I8	A0A2G4HNX3	A0A2G4HVQ0	A0A2G4IE82	A0A2G4IX73	A0A2G4YPB8	A0A2G5FAM3	A0A2G5KBW5	A0A2G5KWW4	A0A2G5P4G4	A0A2G5QJZ0
A0A350Z029	A0A351AGU7	A0A351BDR1	A0A351BDR2	A0A351BYX8	A0A351CAL7	A0A351CM26	A0A351CWY3	A0A351DQR8	A0A3"
KYN06	Quinolinic_acid_synthesis_II	2.5.1.72	Escherichia coli K12	doi:¬†10.1021/acs.biochem.7b00307	A0A009FP77,A0A010YKV0,A0A011NUN8,A0A011QVQ6,A0A011TN20,A0A014LVA2,A0A016XMZ7,A0A017HEX0,A0A017TE41,A0A021VUD0,A0A022Q4P9,A0A023BPE5,A0A023D3K3,A0A023WZI2,A0A024G9B9,A0A024H0Y9,A0A024PAE8,A0A024QFT4,A0A024TKJ0,A0A031HUH8,A0A031IHX1,A0A031JSY9,A0A031LP51,A0A031LTW6,A0A031MEV3,A0A033UTU7,A0A037ZFD8,A0A058ZLB6,A0A059A5U0,A0A059DRN6,A0A059E897,A0A059FJP7,A0A059KKA4,A0A059Y1C1,A0A060B3J8,A0A060JNV5,A0A…
A0A1F3ZKV2	A0A1F4B9D5	A0A1F4BH20	A0A1F4C8S7	A0A1F4DVR8	A0A1F4JM89	A0A1F4K5E5	A0A1F4LWA3	A0A1F4NC77	A0A1F4Q4D9	A0A1F4R8T5	A0A1F4RH72	A0A1F4RKW0	A0A1F4S4B4	A0A1F4SHD1	A0A1F4T6D1	A0A1F4TCY8	A0A1F4TPJ5	A0A1F4UG89	A0A1F5A381	A0A1F5ACG3	A0A1F5AP29	A0A1F5APK9	A0A1F5B1K0	A0A1F5B6J8	A0A1F5C033	A0A1F5C6X1	A0A1F5CPY5	A0A1F5CTB8	A0A1F5D0B6	A0A1F5DHM2	A0A1F5F2S4	A0A1F5FN61	A0A1F5J3M1	A0A1F5RTS8	A0A1F5UX68	A0A1F5VKX2	A0A1F5YPK6	A0A1F5Z307	A0A1F6AN78	A0A1F6C3S5	A0A1F6GBE0	A0A1F6GXD2	A0A1F6LNU5	A0A1F6Q7W0	A0A1F6QE53	A0A1F6QKB8	A0A1F6QN71	A0A1F6RG93	A0A1F6RUK8
A0A1Z8Q7N9	A0A1Z8QME5	A0A1Z8RBT6	A0A1Z8RPY5	A0A1Z8SI98	A0A1Z8TQT6	A0A1Z8UHJ5	A0A1Z8V0F6	A0A1Z8V652	A0A1Z8VP33	A0A1Z8W2Z3	A0A1Z8WUW3	A0A1Z8WYQ2	A0A1Z8X7Q3	A0A1Z8Z370	A0A1Z8ZJY6	A0A1Z9A0X9	A0A1Z9AH15	A0A1Z9AYN4	A0A1Z9BF26	A0A1Z9C3E0	A0A1Z9DQJ0	A0A1Z9DY57	A0A1Z9FZP1	A0A1Z9H5B6	A0A1Z9HYD9	A0A1Z9IZ70	A0A1Z9JAB6	A0A1Z9JWY5	A0A1Z9K7E2	A0A1Z9K976	A0A1Z9LE70	A0A1Z9NPY7	A0A1Z9PXR4	A0A1Z9RPA0	A0A1Z9RYH3	A0A1Z9SZU5	A0A1Z9U8K5	A0A1Z9UA58	A0A1Z9WHJ8	A0A1Z9Z284	A0A200HG17	A0A200RD20	A0A202DLD5	A0A202DZP5	A0A202E7L7	A0A208XFI8	A0A208XY94	A0A210RYA7	A0A211YN48
A0A2N2LF82	A0A2N2LQM3	A0A2N2LWX2	A0A2N2PI01	A0A2N2PTJ5	A0A2N2SBS2	A0A2N2SI14	A0A2N2SSX7	A0A2N2T1X7	A0A2N2TZP0	A0A2N2UY05	A0A2N2W1L9	A0A2N2W3N7	A0A2N2WM73	A0A2N2WWL9	A0A2N2X7P6	A0A2N2Y2I0	A0A2N2YD09	A0A2N2YVA4	A0A2N2Z6W0	A0A2N2ZBK5	A0A2N2ZEZ1	A0A2N2ZWP9	A0A2N3A809	A0A2N3ABD1	A0A2N3E259	A0A2N3F4P9	A0A2N3F6W2	A0A2N3FL04	A0A2N3FUA0	A0A2N3G1S6	A0A2N3G7J5	A0A2N3GBL9	A0A2N3GDC2	A0A2N3HJ39	A0A2N3HR04	A0A2N3PL97	A0A2N3PTV5	A0A2N3QK61	A0A2N3T433	A0A2N3YFM1	A0A2N4S880	A0A2N4T065	A0A2N4X2Y3	A0A2N4X804	A0A2N4XM45	A0A2N4XXM4	A0A2N4Y0N2	A0A2N5EMD6	A0A2N5FIF9
A0A3B9PS23	A0A3B9QM27	A0A3B9SW66	A0A3B9T3E9	A0A3B9TAS3	A0A3B9VCG7	A0A3B9W4M7	A0A3B9W911	A0A3B9X1M6	A0A3"
KYN07	NAD+_synthesis_from_quinolinic_acid	2.4.2.19	Mycobacterium¬†frederiksbergense¬†23ON	https://doi.org/10.1016/j.ibiod.2024.105911	A0A009YRW8	A0A010R525	A0A010YGL0	A0A011NND1	A0A011PSC3	A0A011Q3J8	A0A011QIM4	A0A011QXX8	A0A011T1I5	A0A014NPR7	A0A016XKF2	A0A017H2R9	A0A017HD94	A0A017SIZ1	A0A017SU30	A0A021VQQ7	A0A021WYC0	A0A022L5C5	A0A022Q609	A0A022RPG1	A0A023BV38	A0A023D4H3	A0A023DA27	A0A023NN59	A0A023WYR4	A0A024GT00	A0A024H0G5	A0A024HLZ0	A0A024JXX5	A0A024P976	A0A024QGL9	A0A024TR36	A0A031FS32	A0A031HV39	A0A031HXY2	A0A031LPJ6	A0A031LRY5	A0A037ZI13	A0A058ZM85	A0A059BFE3	A0A059BFZ0	A0A059DQH5	A0A059DZU3	A0A059E9F5	A0A059KQU2
	*The evidence of 4.1.1.28 decarboxylating 5-HT into serotonin is speculative				**To reduce space the ‚ÄúUniRef90_‚Äù prefix was removed from the identifiers of each cluster.
[truncated: 5,000 more columns]

## Sheet: ST5A_Indoles_synth_capacity
Genus	TRP-IPyA	IPyA-ILA	ILA-IA	IA-IPA	TRP-IAM	Indole-TRP	TRP-Indole	Indole Degradation I	TRP-TA
Absicoccus	2/96	0/96	0/96	0/96	0/96	0/96	0/96	0/96	0/96
Acetanaerobacterium	0/27	0/27	0/27	0/27	0/27	0/27	0/27	0/27	0/27
Acetatifactor	11/199	0/199	0/199	0/199	0/199	0/199	0/199	0/199	0/199
Acetivibrio	0/67	0/67	0/67	0/67	0/67	0/67	18/67	0/67	0/67
Acetobacter	626/705	0/705	0/705	0/705	349/705	0/705	0/705	0/705	559/705
Acetomicrobium	1/42	0/42	0/42	0/42	0/42	0/42	2/42	0/42	0/42
Achromobacter	180/449	0/449	0/449	0/449	9/449	0/449	0/449	0/449	2/449
Acidaminococcus	558/1543	3/1543	3/1543	0/1543	0/1543	0/1543	169/1543	0/1543	0/1543
Acidiphilium	44/58	0/58	0/58	0/58	39/58	0/58	0/58	0/58	46/58
Acidovorax	34/365	0/365	0/365	0/365	28/365	0/365	35/365	3/365	2/365
Acinetobacter	6324/7867	0/7867	1150/7867	0/7867	140/7867	3/7867	0/7867	5167/7867	1/7867
Actinobacillus	0/114	0/114	0/114	0/114	0/114	0/114	2/114	0/114	0/114
Actinobaculum	6/439	0/439	2/439	0/439	0/439	0/439	0/439	0/439	0/439
Actinomyces	410/7024	0/7024	0/7024	0/7024	0/7024	0/7024	0/7024	0/7024	0/7024
Acutalibacter	9/890	0/890	0/890	0/890	0/890	0/890	1/890	0/890	115/890
Adlercreutzia	9/1388	0/1388	14/1388	0/1388	0/1388	0/1388	0/1388	0/1388	1/1388
Aeromicrobium	1/110	0/110	7/110	0/110	0/110	0/110	0/110	0/110	18/110
Aeromonas	597/1183	0/1183	0/1183	0/1183	15/1183	3/1183	1122/1183	0/1183	3/1183
Afipia	3/117	0/117	25/117	0/117	114/117	0/117	0/117	0/117	1/117
Agathobacter	19/12048	8/12048	0/12048	0/12048	0/12048	0/12048	2/12048	0/12048	1/12048
Agathobaculum	83/3843	80/3843	0/3843	0/3843	0/3843	0/3843	2913/3843	0/3843	0/3843
Aggregatibacter	53/979	0/979	0/979	0/979	0/979	0/979	0/979	0/979	0/979
Agrobacterium	666/709	0/709	6/709	0/709	172/709	0/709	0/709	0/709	8/709
Akkermansia	422/5650	11/5650	0/5650	0/5650	0/5650	0/5650	4392/5650	0/5650	0/5650
Aliarcobacter	322/328	0/328	0/328	0/328	0/328	0/328	0/328	0/328	0/328
Alistipes	51/22616	17/22616	0/22616	0/22616	0/22616	0/22616	15941/22616	0/22616	0/22616
Alkalihalobacillus	0/18	0/18	0/18	0/18	0/18	0/18	0/18	0/18	0/18
Allisonella	2/177	0/177	0/177	0/177	0/177	0/177	0/177	0/177	47/177
Alloprevotella	64/825	0/825	0/825	0/825	0/825	0/825	13/825	0/825	0/825
Alloscardovia	91/105	0/105	0/105	0/105	0/105	0/105	0/105	0/105	0/105
Alterileibacterium	0/7	0/7	0/7	0/7	0/7	0/7	0/7	0/7	0/7
Amedibacillus	5/171	1/171	0/171	0/171	0/171	0/171	0/171	0/171	0/171
Amedibacterium	2/168	1/168	0/168	0/168	0/168	0/168	0/168	0/168	3/168
Anaerobiospirillum	368/389	0/389	0/389	0/389	0/389	0/389	0/389	0/389	0/389
Anaerobutyricum	5/2084	0/2084	0/2084	0/2084	0/2084	0/2084	0/2084	0/2084	3/2084
Anaerococcus	176/467	0/467	0/467	0/467	0/467	0/467	87/467	0/467	73/467
Anaerocolumna	3/25	0/25	0/25	0/25	0/25	0/25	0/25	0/25	8/25
Anaerofustis	1/14	0/14	0/14	0/14	0/14	0/14	0/14	0/14	0/14
Anaeroglobus	27/1663	0/1663	0/1663	0/1663	0/1663	0/1663	1/1663	0/1663	0/1663
Anaeromassilibacillus	0/221	0/221	2/221	0/221	0/221	1/221	0/221	0/221	0/221
Anaeroplasma	0/26	0/26	0/26	0/26	0/26	0/26	0/26	0/26	0/26
Anaerosacchariphilus	0/63	0/63	0/63	0/63	0/63	0/63	0/63	0/63	0/63
Anaerosalibacter	0/15	0/15	0/15	0/15	1/15	0/15	0/15	0/15	2/15
Anaerosporobacter	0/10	0/10	0/10	0/10	0/10	0/10	0/10	0/10	1/10
Anaerosporomusa	0/1	0/1	0/1	0/1	0/1	0/1	0/1	0/1	0/1
Anaerostipes	59/7375	0/7375	1/7375	0/7375	0/7375	0/7375	34/7375	0/7375	2/7375
Anaerotignum	11/2440	0/2440	0/2440	0/2440	0/2440	0/2440	2/2440	0/2440	3/2440
Anaerotruncus	4/803	0/803	0/803	0/803	0/803	0/803	121/803	0/803	0/803
Anaerovibrio	324/446	0/446	0/446	0/446	0/446	0/446	0/446	0/446	0/446
Aneurinibacillus	9/18	0/18	0/18	0/18	0/18	0/18	0/18	0/18	3/18
Angelakisella	0/5	0/5	0/5	0/5	0/5	0/5	0/5	0/5	0/5
Arachnia	14/691	0/691	0/691	0/691	0/691	0/691	0/691	0/691	0/691
Arcanobacterium	2/89	0/89	0/89	0/89	0/89	0/89	0/89	0/89	0/89
Atlantibacter	171/174	0/174	0/174	0/174	0/174	0/174	167/174	0/174	0/174
Atopobium	4/1105	6/1105	0/1105	0/1105	0/1105	0/1105	1/1105	0/1105	0/1105
Azonexus	0/25	0/25	0/25	0/25	0/25	0/25	0/25	0/25	0/25
Azospirillum	5/91	0/91	1/91	0/91	11/91	0/91	0/91	0/91	2/91
Bacilliculturomica	1/3	0/3	0/3	0/3	0/3	0/3	0/3	0/3	0/3
Bacillus	3887/5903	0/5903	0/5903	0/5903	3096/5903	0/5903	46/5903	0/5903	1827/5903
Bacteroides	24287/28848	0/28848	0/28848	0/28848	1/28848	0/28848	12029/28848	0/28848	5/28848
Bariatricus	0/13	0/13	0/13	0/13	0/13	0/13	11/13	0/13	0/13
Barnesiella	125/6155	0/6155	0/6155	0/6155	0/6155	0/6155	1370/6155	0/6155	0/6155
Beduini	0/5	0/5	0/5	0/5	0/5	0/5	0/5	0/5	0/5
Bifidobacterium	829/24380	0/24380	0/24380	0/24380	0/24380	0/24380	3/24380	0/24380	195/24380
Bilophila	433/2625	0/2625	1/2625	0/2625	0/2625	0/2625	2/2625	0/2625	1/2625
Blastococcus	1/49	0/49	0/49	0/49	11/49	0/49	0/49	0/49	47/49
Blautia	162/23195	11/23195	4/23195	0/23195	0/23195	0/23195	2/23195	0/23195	778/23195
Brachyspira	305/414	4/414	0/414	0/414	0/414	0/414	91/414	0/414	0/414
Bradyrhizobium	295/954	0/954	507/954	0/954	844/954	0/954	3/954	1/954	586/954
Brevibacillus	34/179	0/179	0/179	0/179	0/179	0/179	23/179	0/179	14/179
Brevibacterium	542/1141	0/1141	15/1141	0/1141	27/1141	0/1141	0/1141	0/1141	696/1141
Bulleidia	7/91	0/91	0/91	0/91	0/91	0/91	0/91	0/91	0/91
Butyribacter	3/617	0/617	0/617	0/617	0/617	0/617	0/617	0/617	2/617
Butyricicoccus	90/3303	72/3303	0/3303	0/3303	0/3303	1/3303	2218/3303	0/3303	19/3303
Butyricimonas	1199/1311	0/1311	0/1311	0/1311	0/1311	0/1311	1025/1311	0/1311	0/1311
Butyrivibrio	0/143	0/143	0/143	0/143	0/143	0/143	0/143	0/143	0/143
Campylobacter	24776/27397	0/27397	0/27397	0/27397	0/27397	0/27397	1/27397	0/27397	0/27397
Candidatus_Borkfalkia	1/149	0/149	0/149	0/149	0/149	0/149	0/149	0/149	0/149
Capnocytophaga	189/3592	1/3592	0/3592	0/3592	0/3592	0/3592	0/3592	0/3592	0/3592
Caproiciproducens	0/11	0/11	0/11	0/11	0/11	0/11	0/11	0/11	0/11
Cardiobacterium	83/623	0/623	0/623	0/623	0/623	0/623	381/623	0/623	0/623
Carnobacterium	76/191	0/191	0/191	0/191	1/191	0/191	0/191	0/191	81/191
Catenibacillus	0/6	0/6	0/6	0/6	0/6	0/6	0/6	0/6	0/6
Catenibacterium	12/2253	0/2253	0/2253	0/2253	0/2253	0/2253	0/2253	0/2253	0/2253
Caulobacter	21/157	0/157	1/157	0/157	121/157	0/157	0/157	0/157	12/157
Cedecea	6/32	0/32	0/32	0/32	0/32	0/32	0/32	0/32	0/32
Cellulomonas	91/1131	0/1131	0/1131	0/1131	0/1131	0/1131	2/1131	0/1131	22/1131
Cellulosilyticum	0/17	0/17	0/17	0/17	0/17	0/17	1/17	0/17	0/17
Centipeda	56/118	0/118	0/118	0/118	0/118	0/118	0/118	0/118	0/118
Cetobacterium	21/76	1/76	1/76	0/76	0/76	0/76	47/76	0/76	1/76
Chimaeribacter	15/15	0/15	0/15	0/15	1/15	0/15	0/15	0/15	0/15
Christensenella	45/47	0/47	0/47	0/47	0/47	0/47	0/47	0/47	3/47
Chryseobacterium	300/692	0/692	0/692	0/692	1/692	0/692	179/692	0/692	121/692
Citrobacter	190/3004	0/3004	0/3004	0/3004	2/3004	33/3004	659/3004	0/3004	50/3004
Cloacibacillus	51/235	0/235	17/235	0/235	0/235	0/235	0/235	0/235	2/235
Clostridioides	28/1840	0/1840	0/1840	0/1840	0/1840	0/1840	0/1840	0/1840	59/1840
Clostridium	4097/25198	758/25198	2706/25198	2/25198	22/25198	2/25198	244/25198	0/25198	479/25198
Cohnella	0/57	0/57	0/57	0/57	1/57	0/57	0/57	0/57	0/57
Collinsella	422/11313	24/11313	9/11313	0/11313	0/11313	0/11313	3/11313	0/11313	579/11313
Comamonas	58/465	0/465	0/465	0/465	200/465	0/465	22/465	2/465	28/465
Companilactobacillus	2/145	0/145	0/145	0/145	0/145	0/145	0/145	0/145	8/145
Coprobacillus	11/2002	0/2002	0/2002	0/2002	0/2002	0/2002	0/2002	0/2002	0/2002
Coprobacter	75/506	0/506	0/506	0/506	0/506	0/506	2/506	0/506	0/506
Coprococcus	59/10100	5/10100	4/10100	0/10100	0/10100	1/10100	1/10100	0/10100	486/10100
Corynebacterium	310/5704	0/5704	2/5704	0/5704	1/5704	0/5704	37/5704	0/5704	37/5704
Criibacterium	0/8	0/8	0/8	0/8	0/8	0/8	8/8	0/8	0/8
Cronobacter	957/960	0/960	0/960	0/960	0/960	0/960	105/960	0/960	0/960
Cupriavidus	51/240	0/240	0/240	0/240	9/240	0/240	0/240	0/240	17/240
Cutibacterium	4/3002	12/3002	0/3002	0/3002	1/3002	0/3002	2009/3002	0/3002	0/3002
Dechloromonas	0/45	0/45	0/45	0/45	0/45	0/45	0/45	0/45	0/45
Dermabacter	5/79	0/79	0/79	0/79	3/79	0/79	0/79	0/79	3/79
Desulfitobacterium	0/20	0/20	0/20	0/20	0/20	0/20	18/20	0/20	2/20
Desulfovibrio	293/1975	2/1975	2/1975	0/1975	0/1975	0/1975	1/1975	0/1975	5/1975
Dialister	404/4336	0/4336	0/4336	0/4336	0/4336	0/4336	1/4336	0/4336	33/4336
Dielma	3/39	0/39	0/39	0/39	0/39	0/39	0/39	0/39	0/39
Dorea	22/3196	1/3196	0/3196	0/3196	0/3196	0/3196	5/3196	0/3196	1/3196
Duncaniella	81/3803	0/3803	0/3803	0/3803	0/3803	0/3803	2/3803	0/3803	0/3803
Duodenibacillus	84/561	0/561	0/561	0/561	0/561	0/561	0/561	0/561	0/561
Dysgonomonas	3/131	0/131	0/131	0/131	0/131	0/131	75/131	0/131	1/131
Dysosmobacter	235/3388	63/3388	1/3388	0/3388	0/3388	0/3388	1347/3388	0/3388	44/3388
Edwardsiella	59/62	0/62	0/62	0/62	27/62	0/62	54/62	0/62	0/62
Eggerthella	10/2207	0/2207	30/2207	0/2207	0/2207	0/2207	1/2207	0/2207	0/2207
Eikenella	269/317	0/317	0/317	0/317	0/317	0/317	0/317	0/317	0/317
Eisenbergiella	1/468	3/468	0/468	0/468	0/468	0/468	0/468	0/468	0/468
Elizabethkingia	327/328	0/328	0/328	0/328	0/328	0/328	0/328	0/328	13/328
Ellagibacter	1/595	0/595	0/595	0/595	0/595	0/595	0/595	0/595	0/595
Elusimicrobium	4/14	0/14	0/14	0/14	0/14	0/14	1/14	0/14	0/14
Emergencia	2/91	0/91	0/91	0/91	0/91	0/91	0/91	0/91	15/91
Enorma	0/175	1/175	1/175	0/175	0/175	0/175	0/175	0/175	8/175
Enterobacter	6546/6726	0/6726	0/6726	0/6726	1/6726	51/6726	83/6726	0/6726	13/6726
Enterocloster	539/2974	1/2974	1329/2974	0/2974	0/2974	0/2974	366/2974	0/2974	52/2974
Enterococcus	131/13641	2/13641	0/13641	0/13641	0/13641	0/13641	33/13641	0/13641	11757/13641
Enteroscipio	0/23	0/23	23/23	0/23	0/23	0/23	0/23	0/23	0/23
Enterovibrio	31/33	0/33	0/33	0/33	0/33	0/33	25/33	0/33	0/33
Epilithonimonas	110/133	0/133	0/133	0/133	0/133	0/133	117/133	0/133	1/133
Erwinia	38/158	0/158	0/158	0/158	12/158	0/158	0/158	0/158	44/158
Escherichia	18998/26165	0/26165	0/26165	0/26165	0/26165	1416/26165	24582/26165	0/26165	0/26165
Eshraghiella	8/1180	0/1180	0/1180	0/1180	0/1180	0/1180	0/1180	0/1180	0/1180
Eubacteriales_Family_XIII_Incertae_Sedis_unclassified	13/1677	3/1677	6/1677	0/1677	0/1677	0/1677	0/1677	0/1677	0/1677
Eubacteriales_unclassified	1543/11919	108/11919	63/11919	0/11919	0/11919	0/11919	408/11919	0/11919	67/11919
Eubacterium	79/9034	19/9034	0/9034	0/9034	0/9034	0/9034	4/9034	0/9034	42/9034
Evtepia	137/991	0/991	0/991	0/991	0/991	0/991	1/991	0/991	1/991
Exiguobacterium	10/322	0/322	0/322	0/322	0/322	0/322	0/322	0/322	0/322
Extibacter	9/16	0/16	0/16	0/16	0/16	0/16	0/16	0/16	0/16
Ezakiella	0/90	0/90	0/90	0/90	0/90	0/90	72/90	0/90	0/90
Faecalibacillus	306/2921	79/2921	0/2921	0/2921	0/2921	0/2921	1/2921	0/2921	18/2921
Faecalibacter	6/7	0/7	0/7	0/7	0/7	0/7	0/7	0/7	0/7
Faecalibacterium	31/18486	23/18486	1/18486	0/18486	0/18486	0/18486	46/18486	0/18486	2/18486
Faecalicatena	5/1679	0/1679	0/1679	0/1679	0/1679	0/1679	0/1679	0/1679	20/1679
Faecalicoccus	0/137	0/137	0/137	0/137	0/137	0/137	0/137	0/137	0/137
Faecalimonas	0/754	0/754	0/754	0/754	0/754	0/754	0/754	0/754	604/754
Faecalitalea	4/204	0/204	0/204	0/204	0/204	0/204	0/204	0/204	0/204
Fannyhessea	7/1170	3/1170	0/1170	0/1170	0/1170	0/1170	0/1170	0/1170	0/1170
Fenollaria	0/106	0/106	0/106	0/106	0/106	0/106	88/106	0/106	0/106
Fermentimonas	0/17	0/17	0/17	0/17	0/17	0/17	17/17	0/17	0/17
Fibrobacter	407/456	0/456	0/456	0/456	0/456	0/456	0/456	0/456	0/456
Filifactor	174/215	0/215	0/215	0/215	0/215	0/215	1/215	0/215	0/215
Finegoldia	71/225	0/225	0/225	0/225	0/225	0/225	0/225	0/225	0/225
Flaviflexus	10/98	0/98	0/98	0/98	0/98	0/98	0/98	0/98	0/98
Flavobacterium	15/1026	0/1026	0/1026	0/1026	82/1026	0/1026	1/1026	0/1026	521/1026
Flavonifractor	107/2018	0/2018	4/2018	0/2018	0/2018	0/2018	218/2018	0/2018	11/2018
Flexilinea	0/6	0/6	0/6	0/6	0/6	0/6	0/6	0/6	0/6
Francisella	17/119	0/119	0/119	0/119	0/119	0/119	0/119	0/119	0/119
Franconibacter	1/16	0/16	0/16	0/16	0/16	0/16	0/16	0/16	0/16
Fredinandcohnia	0/10	0/10	0/10	0/10	0/10	0/10	0/10	0/10	0/10
Frisingicoccus	0/136	0/136	1/136	0/136	0/136	0/136	0/136	0/136	3/136
Fructilactobacillus	3/67	10/67	0/67	0/67	0/67	0/67	0/67	0/67	0/67
Fusicatenibacter	12/7521	3/7521	0/7521	0/7521	0/7521	0/7521	1/7521	0/7521	8/7521
Fusobacterium	832/2827	88/2827	34/2827	0/2827	0/2827	0/2827	1692/2827	0/2827	2/2827
Gabonibacter	16/17	0/17	0/17	0/17	0/17	0/17	16/17	0/17	0/17
Garciella	3/3	0/3	0/3	0/3	0/3	0/3	3/3	0/3	0/3
Gemella	82/1576	19/1576	0/1576	0/1576	0/1576	0/1576	4/1576	0/1576	4/1576
Gemmiger	12/13866	35/13866	8/13866	0/13866	0/13866	0/13866	18/13866	0/13866	2/13866
Gleimia	0/40	0/40	0/40	0/40	0/40	0/40	0/40	0/40	0/40
Gordonibacter	0/229	0/229	0/229	0/229	0/229	0/229	0/229	0/229	0/229
Gorillibacterium	0/2	0/2	0/2	0/2	0/2	0/2	0/2	0/2	0/2
Gracilibacillus	5/23	0/23	0/23	0/23	0/23	0/23	0/23	0/23	0/23
Granulicatella	217/1438	42/1438	0/1438	0/1438	0/1438	0/1438	1/1438	0/1438	0/1438
Haemophilus	505/3930	0/3930	0/3930	0/3930	0/3930	0/3930	537/3930	0/3930	3/3930
Hafnia	106/189	0/189	0/189	0/189	0/189	0/189	0/189	0/189	1/189
Hallerella	62/75	0/75	0/75	0/75	0/75	0/75	0/75	0/75	0/75
Haloferax	1/44	0/44	0/44	0/44	0/44	0/44	44/44	0/44	5/44
Halorubrum	1/166	0/166	0/166	0/166	0/166	0/166	0/166	0/166	124/166
Harryflintia	0/6	0/6	0/6	0/6	0/6	0/6	0/6	0/6	0/6
Helicobacter	1309/4517	0/4517	0/4517	0/4517	0/4517	0/4517	0/4517	0/4517	0/4517
Hespellia	0/1	0/1	0/1	0/1	0/1	0/1	0/1	0/1	0/1
Heyndrickxia	84/108	0/108	0/108	0/108	0/108	0/108	0/108	0/108	0/108
Holdemanella	169/3887	92/3887	0/3887	0/3887	0/3887	0/3887	0/3887	0/3887	3/3887
Holdemania	2/106	0/106	0/106	0/106	0/106	0/106	0/106	0/106	4/106
Hungatella	58/590	0/590	219/590	0/590	0/590	0/590	1/590	0/590	0/590
Hydrogeniiclostridium	0/22	0/22	0/22	0/22	0/22	0/22	1/22	0/22	0/22
Intestinibacter	11/331	0/331	0/331	0/331	0/331	0/331	0/331	0/331	1/331
Intestinimonas	10/313	0/313	3/313	0/313	0/313	0/313	78/313	0/313	2/313
Janthinobacterium	7/192	0/192	0/192	0/192	40/192	0/192	0/192	0/192	71/192
Johnsonella	17/23	0/23	1/23	0/23	0/23	0/23	0/23	0/23	0/23
Jonquetella	22/23	0/23	0/23	0/23	0/23	0/23	0/23	0/23	0/23
Kallipyga	0/5	0/5	0/5	0/5	0/5	0/5	0/5	0/5	0/5
Kineothrix	47/549	0/549	0/549	0/549	0/549	0/549	0/549	0/549	0/549
Klebsiella	17181/17731	0/17731	0/17731	0/17731	1/17731	431/17731	2044/17731	0/17731	1/17731
Kluyvera	97/116	0/116	0/116	0/116	0/116	3/116	85/116	0/116	11/116
Kocuria	48/808	0/808	2/808	0/808	171/808	0/808	0/808	0/808	1/808
Kosakonia	111/111	0/111	0/111	0/111	0/111	0/111	1/111	0/111	0/111
Kurthia	9/80	0/80	0/80	0/80	0/80	0/80	0/80	0/80	0/80
Lachnoanaerobaculum	1/1221	0/1221	11/1221	0/1221	0/1221	0/1221	1025/1221	0/1221	0/1221
Lachnobacterium	0/14	0/14	0/14	0/14	0/14	0/14	0/14	0/14	0/14
Lachnoclostridium	516/1228	164/1228	210/1228	0/1228	0/1228	0/1228	22/1228	0/1228	84/1228
Lachnospira	15/8580	6/8580	0/8580	0/8580	0/8580	0/8580	3/8580	0/8580	0/8580
Lachnospiraceae_unclassified	1813/66408	225/66408	2080/66408	0/66408	0/66408	7/66408	651/66408	0/66408	6013/66408
Lachnotalea	0/13	0/13	0/13	0/13	0/13	0/13	0/13	0/13	2/13
Lacrimispora	785/2115	5/2115	6/2115	0/2115	0/2115	0/2115	59/2115	0/2115	4/2115
Lacticaseibacillus	1559/1840	3/1840	0/1840	0/1840	0/1840	0/1840	0/1840	0/1840	0/1840
Lactiplantibacillus	604/1099	0/1099	53/1099	0/1099	697/1099	0/1099	0/1099	0/1099	1/1099
Lactobacillus	1242/8610	100/8610	39/8610	0/8610	0/8610	0/8610	0/8610	0/8610	824/8610
Lactococcus	309/3244	0/3244	0/3244	0/3244	1/3244	0/3244	0/3244	0/3244	5/3244
Lactonifactor	0/14	0/14	0/14	0/14	0/14	0/14	0/14	0/14	0/14
Lagierella	1/2	0/2	0/2	0/2	0/2	0/2	0/2	0/2	0/2
Lancefieldella	5/1414	7/1414	0/1414	0/1414	0/1414	0/1414	1/1414	0/1414	0/1414
Lapidilactobacillus	0/24	0/24	0/24	0/24	0/24	0/24	0/24	0/24	0/24
Laribacter	0/31	0/31	0/31	0/31	0/31	0/31	0/31	0/31	0/31
Latilactobacillus	15/459	0/459	0/459	0/459	0/459	0/459	0/459	0/459	136/459
Lawsonella	2/58	0/58	0/58	0/58	0/58	0/58	0/58	0/58	0/58
Lawsonibacter	16/577	0/577	2/577	0/577	0/577	0/577	4/577	0/577	7/577
Leclercia	465/475	0/475	0/475	0/475	0/475	0/475	437/475	0/475	0/475
Leminorella	0/3	0/3	0/3	0/3	0/3	0/3	0/3	0/3	0/3
Lentihominibacter	49/641	0/641	0/641	0/641	0/641	2/641	0/641	0/641	0/641
Lentilactobacillus	7/597	2/597	1/597	0/597	0/597	0/597	0/597	0/597	21/597
Leptotrichia	434/2054	2/2054	0/2054	0/2054	0/2054	0/2054	0/2054	0/2054	0/2054
Leuconostoc	196/1408	7/1408	0/1408	0/1408	0/1408	0/1408	0/1408	0/1408	5/1408
Levilactobacillus	23/390	0/390	0/390	0/390	1/390	0/390	0/390	0/390	167/390
Levyella	0/50	0/50	0/50	0/50	0/50	0/50	44/50	0/50	0/50
Leyella	1146/2095	0/2095	0/2095	0/2095	0/2095	0/2095	0/2095	0/2095	0/2095
Ligilactobacillus	116/3242	0/3242	0/3242	0/3242	0/3242	0/3242	0/3242	0/3242	13/3242
Limosilactobacillus	1558/3385	2/3385	0/3385	0/3385	0/3385	0/3385	0/3385	0/3385	230/3385
Listeria	4006/4038	1/4038	0/4038	0/4038	0/4038	0/4038	0/4038	0/4038	1/4038
Loigolactobacillus	0/113	0/113	0/113	0/113	0/113	0/113	0/113	0/113	13/113
Longibaculum	0/38	0/38	0/38	0/38	0/38	0/38	0/38	0/38	0/38
Longicatena	1/215	0/215	0/215	0/215	0/215	0/215	0/215	0/215	0/215
Luxibacter	0/15	0/15	0/15	0/15	0/15	0/15	0/15	0/15	0/15
Lysinibacillus	13/266	0/266	0/266	0/266	1/266	0/266	1/266	0/266	33/266
Mailhella	3/18	1/18	0/18	0/18	0/18	0/18	0/18	0/18	0/18
Marvinbryantia	0/42	0/42	0/42	0/42	0/42	0/42	0/42	0/42	0/42
Massilibacterium	0/2	0/2	0/2	0/2	0/2	0/2	0/2	0/2	0/2
Massilicoli	0/32	3/32	0/32	0/32	0/32	0/32	0/32	0/32	0/32
Massilioclostridium	0/9	0/9	0/9	0/9	0/9	0/9	0/9	0/9	0/9
Massilistercora	0/58	0/58	0/58	0/58	0/58	0/58	0/58	0/58	4/58
Mediterraneibacter	38/10530	22/10530	0/10530	0/10530	0/10530	0/10530	0/10530	0/10530	3264/10530
Megamonas	1762/2166	0/2166	0/2166	0/2166	0/2166	0/2166	0/2166	0/2166	6/2166
Megasphaera	95/4443	1/4443	0/4443	0/4443	0/4443	0/4443	4/4443	0/4443	12/4443
Merdibacter	0/1	0/1	0/1	0/1	0/1	0/1	0/1	0/1	0/1
Merdimonas	0/119	0/119	0/119	0/119	0/119	0/119	0/119	0/119	98/119
Mesosutterella	36/487	0/487	0/487	0/487	0/487	0/487	0/487	0/487	0/487
Metamycoplasma	0/404	0/404	0/404	0/404	0/404	0/404	0/404	0/404	0/404
Methanobacterium	2/86	0/86	0/86	0/86	0/86	0/86	0/86	0/86	72/86
Methanobrevibacter	9/2867	0/2867	0/2867	0/2867	0/2867	0/2867	0/2867	0/2867	2503/2867
Methanocorpusculum	13/107	0/107	0/107	0/107	0/107	0/107	0/107	0/107	87/107
Methanomassiliicoccus	5/71	0/71	0/71	0/71	0/71	0/71	0/71	0/71	0/71
Methanomethylophilus	13/161	0/161	0/161	0/161	0/161	0/161	0/161	0/161	0/161
Methanosphaera	15/292	0/292	0/292	0/292	0/292	0/292	0/292	0/292	264/292
Methylobacterium	104/340	0/340	170/340	0/340	302/340	0/340	0/340	0/340	32/340
Micrococcus	559/682	0/682	0/682	0/682	50/682	0/682	0/682	0/682	8/682
Microvirga	33/70	0/70	0/70	0/70	64/70	0/70	0/70	0/70	21/70
Mitsuokella	581/712	0/712	0/712	0/712	0/712	0/712	0/712	0/712	0/712
Mixta	5/86	0/86	0/86	0/86	0/86	0/86	0/86	0/86	0/86
Mobilibacterium	12/13	12/13	12/13	0/13	0/13	0/13	0/13	0/13	0/13
Mobilicoccus	1/16	0/16	0/16	0/16	0/16	0/16	15/16	0/16	0/16
Mobiluncus	4/343	0/343	0/343	0/343	0/343	0/343	0/343	0/343	4/343
Moellerella	0/9	0/9	0/9	0/9	0/9	0/9	9/9	0/9	0/9
Monoglobus	0/487	0/487	0/487	0/487	0/487	0/487	0/487	0/487	0/487
Morganella	5/472	0/472	0/472	0/472	0/472	5/472	459/472	0/472	0/472
Murdochiella	0/6	0/6	0/6	0/6	0/6	0/6	6/6	0/6	0/6
Muribaculum	202/2546	0/2546	0/2546	0/2546	0/2546	0/2546	1234/2546	0/2546	0/2546
Muricomes	0/42	0/42	0/42	0/42	0/42	0/42	0/42	0/42	0/42
Murimonas	0/5	0/5	0/5	0/5	0/5	0/5	0/5	0/5	0/5
Mycobacterium	103/925	0/925	12/925	0/925	13/925	0/925	0/925	0/925	35/925
Mycoplasma	9/142	16/142	0/142	0/142	0/142	0/142	0/142	0/142	0/142
Mycoplasmopsis	15/374	23/374	0/374	0/374	0/374	0/374	0/374	0/374	0/374
Negativibacillus	6/297	0/297	1/297	0/297	0/297	0/297	0/297	0/297	1/297
Negativicoccus	90/118	0/118	0/118	0/118	0/118	0/118	0/118	0/118	0/118
Neisseria	57/5178	0/5178	0/5178	0/5178	0/5178	0/5178	6/5178	0/5178	0/5178
Neobacillus	2/58	0/58	0/58	0/58	2/58	0/58	4/58	0/58	2/58
Neofamilia	0/1	0/1	0/1	0/1	0/1	0/1	1/1	0/1	0/1
Nesterenkonia	5/144	0/144	0/144	0/144	106/144	0/144	0/144	0/144	1/144
Niallia	2/58	0/58	0/58	0/58	0/58	0/58	0/58	0/58	0/58
Niameybacter	0/2	0/2	0/2	0/2	0/2	0/2	0/2	0/2	0/2
Nigerium	0/1	0/1	0/1	0/1	0/1	0/1	0/1	0/1	0/1
Nitratidesulfovibrio	5/34	0/34	0/34	0/34	0/34	0/34	13/34	0/34	30/34
Nosocomiicoccus	1/23	0/23	0/23	0/23	0/23	0/23	0/23	0/23	15/23
Noviherbaspirillum	0/24	0/24	0/24	0/24	1/24	0/24	1/24	0/24	6/24
Numidum	0/1	0/1	0/1	0/1	0/1	0/1	1/1	0/1	0/1
Oceanobacillus	12/68	0/68	0/68	0/68	0/68	0/68	0/68	0/68	2/68
Odoribacter	2914/3858	1/3858	0/3858	0/3858	0/3858	0/3858	2911/3858	0/3858	0/3858
Olegusella	2/23	0/23	0/23	0/23	0/23	0/23	0/23	0/23	0/23
Olsenella	5/1227	1/1227	0/1227	0/1227	0/1227	0/1227	1/1227	0/1227	4/1227
Oribacterium	17/1777	0/1777	0/1777	0/1777	0/1777	0/1777	722/1777	0/1777	0/1777
Oscillibacter	1077/9165	66/9165	9/9165	0/9165	0/9165	1/9165	563/9165	0/9165	78/9165
Oxalobacter	17/148	0/148	0/148	0/148	0/148	0/148	2/148	0/148	0/148
Paenibacillus	145/1005	0/1005	0/1005	0/1005	6/1005	0/1005	45/1005	0/1005	168/1005
Paenisporosarcina	2/104	0/104	0/104	0/104	0/104	0/104	0/104	0/104	0/104
Pantoea	661/941	0/941	2/941	0/941	59/941	0/941	202/941	5/941	29/941
Parabacteroides	8319/14479	0/14479	0/14479	0/14479	0/14479	0/14479	36/14479	0/14479	1/14479
Paraclostridium	119/828	0/828	0/828	0/828	0/828	0/828	117/828	0/828	33/828
Paraeggerthella	0/24	0/24	0/24	0/24	0/24	0/24	0/24	0/24	0/24
Paramuribaculum	25/1014	0/1014	0/1014	0/1014	0/1014	0/1014	1/1014	0/1014	0/1014
Paraprevotella	306/2037	0/2037	0/2037	0/2037	0/2037	0/2037	9/2037	0/2037	0/2037
Parascardovia	0/36	0/36	0/36	0/36	0/36	0/36	0/36	0/36	0/36
Parasutterella	415/3456	0/3456	1/3456	0/3456	0/3456	0/3456	1/3456	0/3456	0/3456
Paratractidigestivibacter	4/435	1/435	0/435	0/435	0/435	0/435	0/435	0/435	0/435
Parolsenella	0/213	0/213	0/213	0/213	0/213	0/213	0/213	0/213	0/213
Parvimonas	10/402	0/402	0/402	0/402	0/402	0/402	1/402	0/402	0/402
Paucimonas	0/1	0/1	1/1	0/1	0/1	0/1	0/1	0/1	0/1
Pauljensenia	52/1316	0/1316	0/1316	0/1316	0/1316	0/1316	0/1316	0/1316	0/1316
Pediococcus	77/492	1/492	0/492	0/492	0/492	0/492	0/492	0/492	1/492
Pelistega	0/11	0/11	0/11	0/11	2/11	0/11	8/11	0/11	0/11
Pelosinus	2/11	0/11	0/11	0/11	0/11	0/11	7/11	0/11	0/11
Peptacetobacter	74/438	0/438	0/438	0/438	0/438	0/438	10/438	0/438	1/438
Peptococcus	8/39	0/39	0/39	0/39	0/39	0/39	0/39	0/39	0/39
Peptoniphilus	128/709	0/709	2/709	0/709	0/709	0/709	386/709	0/709	1/709
Peptostreptococcaceae_unclassified	113/245	0/245	0/245	0/245	0/245	0/245	149/245	0/245	0/245
Peptostreptococcus	178/912	1/912	9/912	0/912	0/912	0/912	1/912	0/912	0/912
Peribacillus	5/147	0/147	0/147	0/147	0/147	0/147	0/147	0/147	3/147
Phascolarctobacterium	6060/7078	0/7078	1/7078	0/7078	0/7078	0/7078	2/7078	0/7078	0/7078
Phocaeicola	9818/16383	0/16383	0/16383	0/16383	0/16383	0/16383	60/16383	0/16383	1/16383
Phoenicibacter	0/12	0/12	0/12	0/12	0/12	0/12	0/12	0/12	0/12
Phyllobacterium	50/54	0/54	0/54	0/54	8/54	0/54	0/54	0/54	7/54
Phytobacter	52/52	0/52	0/52	0/52	0/52	2/52	47/52	0/52	48/52
Pigmentiphaga	0/13	0/13	0/13	0/13	5/13	0/13	0/13	0/13	0/13
Planococcus	59/107	0/107	0/107	0/107	0/107	0/107	0/107	0/107	0/107
Plesiomonas	1/66	0/66	0/66	0/66	0/66	0/66	59/66	0/66	0/66
Pluralibacter	14/60	0/60	0/60	0/60	0/60	0/60	5/60	0/60	0/60
Porphyromonas	657/4761	0/4761	0/4761	0/4761	0/4761	0/4761	1046/4761	0/4761	0/4761
Pradoshia	1/9	0/9	0/9	0/9	0/9	0/9	0/9	0/9	0/9
Prevotella	4591/16426	1/16426	1/16426	0/16426	0/16426	0/16426	2374/16426	0/16426	0/16426
Prevotellamassilia	19/584	0/584	0/584	0/584	0/584	0/584	0/584	0/584	0/584
Priestia	12/400	0/400	0/400	0/400	0/400	0/400	0/400	0/400	16/400
Propionibacterium	6/241	0/241	0/241	0/241	0/241	0/241	0/241	0/241	0/241
Proteus	19/1765	0/1765	0/1765	0/1765	0/1765	7/1765	202/1765	0/1765	1/1765
Providencia	10/611	0/611	0/611	0/611	65/611	15/611	572/611	0/611	1/611
Pseudescherichia	24/70	0/70	0/70	0/70	0/70	0/70	0/70	0/70	0/70
Pseudobutyrivibrio	0/50	0/50	0/50	0/50	0/50	0/50	0/50	0/50	0/50
Pseudoflavonifractor	128/749	0/749	4/749	0/749	0/749	0/749	27/749	0/749	45/749
Pseudomonas	1194/13414	0/13414	1259/13414	0/13414	12398/13414	801/13414	15/13414	112/13414	1688/13414
Pseudoruminococcus	1/868	0/868	0/868	0/868	0/868	0/868	0/868	0/868	0/868
Psychrobacillus	1/35	0/35	0/35	0/35	0/35	0/35	0/35	0/35	1/35
Pygmaiobacter	0/15	0/15	0/15	0/15	0/15	0/15	12/15	0/15	0/15
Pyramidobacter	75/87	0/87	0/87	0/87	0/87	0/87	0/87	0/87	0/87
Rahnella	126/133	0/133	0/133	0/133	0/133	0/133	0/133	0/133	13/133
Ralstonia	157/419	0/419	0/419	0/419	156/419	0/419	0/419	0/419	9/419
Raoultella	377/415	0/415	0/415	0/415	0/415	2/415	264/415	0/415	0/415
Raoultibacter	0/51	0/51	0/51	0/51	0/51	0/51	0/51	0/51	0/51
Rhodococcus	230/711	0/711	7/711	0/711	437/711	0/711	0/711	0/711	10/711
Rikenella	0/22	0/22	0/22	0/22	0/22	0/22	0/22	0/22	0/22
Risungbinella	0/1	0/1	0/1	0/1	0/1	0/1	0/1	0/1	0/1
Robertmurraya	4/20	0/20	0/20	0/20	0/20	0/20	0/20	0/20	0/20
Robinsoniella	1/27	0/27	0/27	0/27	0/27	0/27	0/27	0/27	2/27
Romboutsia	136/966	0/966	0/966	0/966	0/966	0/966	2/966	0/966	3/966
Roseateles	15/152	0/152	0/152	0/152	48/152	0/152	0/152	1/152	21/152
Roseburia	71/13720	3/13720	3/13720	0/13720	0/13720	1/13720	2/13720	0/13720	9/13720
Rothia	206/3621	0/3621	5/3621	0/3621	0/3621	0/3621	0/3621	0/3621	0/3621
Rubeoparvulum	1/1	0/1	0/1	0/1	0/1	0/1	0/1	0/1	0/1
Rubneribacter	0/35	0/35	10/35	0/35	0/35	0/35	0/35	0/35	0/35
Ruminiclostridium	5/61	0/61	0/61	0/61	6/61	0/61	19/61	0/61	8/61
Ruminobacter	7/53	0/53	0/53	0/53	0/53	0/53	0/53	0/53	0/53
Ruminococcus	69/25512	225/25512	3/25512	0/25512	0/25512	6/25512	5/25512	0/25512	7/25512
Ruthenibacterium	13/1849	0/1849	101/1849	0/1849	0/1849	0/1849	1/1849	0/1849	0/1849
Salinicola	12/53	0/53	0/53	0/53	0/53	0/53	0/53	0/53	0/53
Salmonella	268/4437	0/4437	0/4437	0/4437	0/4437	8/4437	51/4437	0/4437	0/4437
Sarcina	2/243	0/243	0/243	0/243	0/243	0/243	0/243	0/243	3/243
Scardovia	15/178	0/178	0/178	0/178	0/178	0/178	0/178	0/178	0/178
Schaedlerella	1/75	0/75	2/75	0/75	0/75	0/75	0/75	0/75	0/75
Schleiferilactobacillus	0/84	0/84	0/84	0/84	0/84	0/84	0/84	0/84	0/84
Sedimentibacter	16/30	0/30	0/30	0/30	0/30	0/30	16/30	0/30	0/30
Segatella	422/9553	0/9553	0/9553	0/9553	0/9553	0/9553	6/9553	0/9553	0/9553
Selenomonas	1097/1906	0/1906	0/1906	0/1906	0/1906	0/1906	0/1906	0/1906	0/1906
Sellimonas	2/679	0/679	0/679	0/679	0/679	0/679	0/679	0/679	15/679
Senegalimassilia	3/903	0/903	1/903	0/903	0/903	0/903	1/903	0/903	0/903
Serratia	1649/1705	0/1705	0/1705	0/1705	105/1705	0/1705	12/1705	0/1705	1557/1705
Slackia	6/1019	0/1019	3/1019	0/1019	0/1019	0/1019	0/1019	0/1019	0/1019
Sneathia	10/781	1/781	0/781	0/781	0/781	0/781	0/781	0/781	0/781
Sodaliphilus	73/229	0/229	0/229	0/229	0/229	0/229	0/229	0/229	0/229
Solobacterium	57/1012	15/1012	0/1012	0/1012	0/1012	0/1012	2/1012	0/1012	0/1012
Sphaerochaeta	48/59	0/59	3/59	0/59	0/59	0/59	0/59	0/59	0/59
Sphingomonas	550/1116	0/1116	68/1116	0/1116	668/1116	0/1116	0/1116	0/1116	89/1116
Sporanaerobacter	0/9	0/9	0/9	0/9	0/9	0/9	0/9	0/9	0/9
Sporolactobacillus	11/23	0/23	0/23	0/23	0/23	0/23	0/23	0/23	0/23
Staphylococcus	3723/13932	0/13932	0/13932	0/13932	4/13932	0/13932	30/13932	0/13932	3840/13932
Stenotrophomonas	1399/2159	0/2159	30/2159	0/2159	78/2159	0/2159	0/2159	0/2159	4/2159
Stomatobaculum	22/1007	0/1007	0/1007	0/1007	0/1007	0/1007	0/1007	0/1007	0/1007
Streptococcus	281/24479	38/24479	1/24479	0/24479	0/24479	0/24479	1/24479	0/24479	24/24479
Streptomyces	12/2806	0/2806	2/2806	0/2806	2696/2806	0/2806	327/2806	7/2806	633/2806
Stutzerimonas	275/1324	0/1324	0/1324	0/1324	184/1324	0/1324	0/1324	0/1324	4/1324
Subdoligranulum	3/7255	7/7255	5/7255	0/7255	0/7255	0/7255	2/7255	0/7255	1/7255
Succinatimonas	3/26	1/26	0/26	0/26	0/26	0/26	0/26	0/26	0/26
Succiniclasticum	231/248	0/248	0/248	0/248	0/248	0/248	0/248	0/248	5/248
Succinivibrio	8/82	0/82	0/82	0/82	0/82	0/82	0/82	0/82	0/82
Superficieibacter	14/16	0/16	0/16	0/16	0/16	0/16	0/16	0/16	3/16
Sutterella	4622/6129	0/6129	0/6129	0/6129	0/6129	0/6129	1/6129	0/6129	0/6129
Synergistes	2/11	0/11	0/11	0/11	0/11	0/11	0/11	0/11	0/11
Terasakiella	6/8	0/8	0/8	0/8	0/8	0/8	0/8	0/8	0/8
Terrisporobacter	0/35	0/35	0/35	0/35	0/35	0/35	0/35	0/35	0/35
Thalassobacillus	0/6	0/6	0/6	0/6	0/6	0/6	0/6	0/6	0/6
Thomasclavelia	29/1614	17/1614	0/1614	0/1614	0/1614	0/1614	1/1614	0/1614	5/1614
Timonella	0/5	0/5	0/5	0/5	0/5	0/5	0/5	0/5	0/5
Tissierella	2/44	0/44	0/44	0/44	0/44	0/44	1/44	0/44	3/44
Trabulsiella	5/5	0/5	0/5	0/5	0/5	0/5	0/5	0/5	0/5
Traorella	0/7	0/7	0/7	0/7	0/7	0/7	0/7	0/7	0/7
Treponema	148/2569	4/2569	12/2569	0/2569	0/2569	5/2569	930/2569	0/2569	1/2569
Turicibacter	69/1053	0/1053	0/1053	0/1053	0/1053	0/1053	0/1053	0/1053	2/1053
Turicimonas	13/366	0/366	0/366	0/366	0/366	0/366	0/366	0/366	0/366
Ureaplasma	0/81	0/81	0/81	0/81	0/81	0/81	0/81	0/81	0/81
Ureibacillus	5/24	0/24	0/24	0/24	0/24	0/24	0/24	0/24	0/24
Vagococcus	3/145	0/145	0/145	0/145	0/145	0/145	2/145	0/145	53/145
Varibaculum	8/220	0/220	0/220	0/220	0/220	0/220	0/220	0/220	0/220
Veillonella	5387/6888	0/6888	0/6888	0/6888	0/6888	0/6888	1/6888	0/6888	4/6888
Vescimonas	268/2119	0/2119	0/2119	0/2119	0/2119	0/2119	11/2119	0/2119	6/2119
Vibrio	2395/7499	0/7499	0/7499	0/7499	31/7499	0/7499	7147/7499	5/7499	134/7499
Victivallis	15/361	1/361	0/361	0/361	0/361	0/361	0/361	0/361	0/361
Virgibacillus	7/78	0/78	0/78	0/78	0/78	0/78	0/78	0/78	11/78
Vitreoscilla	4/5	0/5	0/5	0/5	0/5	0/5	0/5	0/5	0/5
Waltera	28/6310	0/6310	0/6310	0/6310	0/6310	0/6310	0/6310	0/6310	0/6310
Weissella	0/547	29/547	0/547	0/547	0/547	0/547	0/547	0/547	2/547
Winkia	0/58	0/58	0/58	0/58	0/58	0/58	0/58	0/58	0/58
Wujia	2/2588	0/2588	0/2588	0/2588	0/2588	0/2588	0/2588	0/2588	0/2588
Xanthomonas	882/981	0/981	0/981	0/981	792/981	2/981	0/981	0/981	0/981
Yersinia	832/1173	0/1173	0/1173	0/1173	5/1173	0/1173	888/1173	0/1173	212/1173
Yokenella	13/14	0/14	0/14	0/14	0/14	0/14	3/14	0/14	0/14

## Sheet: ST5B_Serotonin_synth_capacity
Genus	TRP-5HTP	5HTP-5HT
Absicoccus	0/96	0/96
Acetanaerobacterium	0/27	0/27
Acetatifactor	0/199	0/199
Acetivibrio	0/67	0/67
Acetobacter	0/705	0/705
Acetomicrobium	0/42	0/42
Achromobacter	1/449	2/449
Acidaminococcus	0/1543	0/1543
Acidiphilium	0/58	0/58
Acidovorax	311/365	0/365
Acinetobacter	0/7867	0/7867
Actinobacillus	0/114	0/114
Actinobaculum	0/439	0/439
Actinomyces	0/7024	0/7024
Acutalibacter	0/890	0/890
Adlercreutzia	0/1388	0/1388
Aeromicrobium	65/110	0/110
Aeromonas	1135/1183	3/1183
Afipia	0/117	1/117
Agathobacter	0/12048	0/12048
Agathobaculum	0/3843	0/3843
Aggregatibacter	0/979	0/979
Agrobacterium	0/709	6/709
Akkermansia	0/5650	0/5650
Aliarcobacter	0/328	0/328
Alistipes	0/22616	0/22616
Alkalihalobacillus	3/18	0/18
Allisonella	0/177	0/177
Alloprevotella	0/825	0/825
Alloscardovia	0/105	0/105
Alterileibacterium	0/7	0/7
Amedibacillus	0/171	0/171
Amedibacterium	0/168	0/168
Anaerobiospirillum	0/389	0/389
Anaerobutyricum	0/2084	0/2084
Anaerococcus	0/467	0/467
Anaerocolumna	0/25	0/25
Anaerofustis	0/14	0/14
Anaeroglobus	0/1663	0/1663
Anaeromassilibacillus	0/221	0/221
Anaeroplasma	0/26	0/26
Anaerosacchariphilus	0/63	0/63
Anaerosalibacter	0/15	0/15
Anaerosporobacter	0/10	0/10
Anaerosporomusa	0/1	0/1
Anaerostipes	0/7375	0/7375
Anaerotignum	0/2440	0/2440
Anaerotruncus	0/803	0/803
Anaerovibrio	0/446	0/446
Aneurinibacillus	6/18	0/18
Angelakisella	0/5	0/5
Arachnia	0/691	0/691
Arcanobacterium	0/89	0/89
Atlantibacter	0/174	0/174
Atopobium	0/1105	0/1105
Azonexus	0/25	0/25
Azospirillum	9/91	1/91
Bacilliculturomica	0/3	0/3
Bacillus	3186/5903	1707/5903
Bacteroides	0/28848	0/28848
Bariatricus	0/13	0/13
Barnesiella	0/6155	0/6155
Beduini	0/5	0/5
Bifidobacterium	0/24380	0/24380
Bilophila	0/2625	0/2625
Blastococcus	2/49	0/49
Blautia	1/23195	0/23195
Brachyspira	0/414	0/414
Bradyrhizobium	2/954	571/954
Brevibacillus	41/179	0/179
Brevibacterium	0/1141	1/1141
Bulleidia	0/91	0/91
Butyribacter	0/617	0/617
Butyricicoccus	0/3303	0/3303
Butyricimonas	0/1311	0/1311
Butyrivibrio	0/143	0/143
Campylobacter	0/27397	0/27397
Candidatus_Borkfalkia	0/149	0/149
Capnocytophaga	0/3592	0/3592
Caproiciproducens	0/11	0/11
Cardiobacterium	0/623	0/623
Carnobacterium	0/191	0/191
Catenibacillus	0/6	0/6
Catenibacterium	0/2253	0/2253
Caulobacter	150/157	9/157
Cedecea	0/32	0/32
Cellulomonas	29/1131	0/1131
Cellulosilyticum	0/17	0/17
Centipeda	0/118	0/118
Cetobacterium	0/76	0/76
Chimaeribacter	0/15	0/15
Christensenella	0/47	0/47
Chryseobacterium	2/692	0/692
Citrobacter	0/3004	49/3004
Cloacibacillus	0/235	0/235
Clostridioides	0/1840	0/1840
Clostridium	1/25198	0/25198
Cohnella	0/57	0/57
Collinsella	0/11313	0/11313
Comamonas	325/465	28/465
Companilactobacillus	0/145	0/145
Coprobacillus	0/2002	0/2002
Coprobacter	0/506	0/506
Coprococcus	0/10100	0/10100
Corynebacterium	0/5704	0/5704
Criibacterium	0/8	0/8
Cronobacter	0/960	0/960
Cupriavidus	233/240	13/240
Cutibacterium	0/3002	0/3002
Dechloromonas	0/45	0/45
Dermabacter	0/79	0/79
Desulfitobacterium	0/20	0/20
Desulfovibrio	0/1975	5/1975
Dialister	0/4336	0/4336
Dielma	0/39	0/39
Dorea	0/3196	0/3196
Duncaniella	0/3803	0/3803
Duodenibacillus	0/561	0/561
Dysgonomonas	0/131	0/131
Dysosmobacter	0/3388	0/3388
Edwardsiella	0/62	0/62
Eggerthella	0/2207	0/2207
Eikenella	0/317	0/317
Eisenbergiella	0/468	0/468
Elizabethkingia	0/328	0/328
Ellagibacter	0/595	0/595
Elusimicrobium	0/14	0/14
Emergencia	0/91	0/91
Enorma	0/175	0/175
Enterobacter	6/6726	12/6726
Enterocloster	0/2974	0/2974
Enterococcus	0/13641	1/13641
Enteroscipio	0/23	0/23
Enterovibrio	25/33	0/33
Epilithonimonas	0/133	0/133
Erwinia	0/158	44/158
Escherichia	0/26165	0/26165
Eshraghiella	0/1180	0/1180
Eubacteriales_Family_XIII_Incertae_Sedis_unclassified	0/1677	0/1677
Eubacteriales_unclassified	1/11919	0/11919
Eubacterium	0/9034	0/9034
Evtepia	0/991	0/991
Exiguobacterium	135/322	0/322
Extibacter	0/16	0/16
Ezakiella	0/90	0/90
Faecalibacillus	1/2921	0/2921
Faecalibacter	0/7	0/7
Faecalibacterium	0/18486	0/18486
Faecalicatena	0/1679	0/1679
Faecalicoccus	0/137	0/137
Faecalimonas	0/754	0/754
Faecalitalea	0/204	0/204
Fannyhessea	0/1170	0/1170
Fenollaria	0/106	0/106
Fermentimonas	0/17	0/17
Fibrobacter	0/456	0/456
Filifactor	0/215	0/215
Finegoldia	0/225	0/225
Flaviflexus	0/98	0/98
Flavobacterium	838/1026	19/1026
Flavonifractor	0/2018	0/2018
Flexilinea	0/6	0/6
Francisella	0/119	0/119
Franconibacter	0/16	0/16
Fredinandcohnia	0/10	0/10
Frisingicoccus	0/136	0/136
Fructilactobacillus	0/67	0/67
Fusicatenibacter	0/7521	0/7521
Fusobacterium	0/2827	0/2827
Gabonibacter	0/17	0/17
Garciella	0/3	0/3
Gemella	0/1576	0/1576
Gemmiger	0/13866	0/13866
Gleimia	0/40	0/40
Gordonibacter	0/229	0/229
Gorillibacterium	0/2	0/2
Gracilibacillus	0/23	0/23
Granulicatella	0/1438	0/1438
Haemophilus	0/3930	0/3930
Hafnia	0/189	0/189
Hallerella	0/75	0/75
Haloferax	0/44	1/44
Halorubrum	0/166	0/166
Harryflintia	0/6	0/6
Helicobacter	0/4517	0/4517
Hespellia	0/1	0/1
Heyndrickxia	0/108	0/108
Holdemanella	0/3887	0/3887
Holdemania	0/106	0/106
Hungatella	0/590	0/590
Hydrogeniiclostridium	0/22	0/22
Intestinibacter	0/331	0/331
Intestinimonas	0/313	0/313
Janthinobacterium	5/192	60/192
Johnsonella	0/23	0/23
Jonquetella	0/23	0/23
Kallipyga	0/5	0/5
Kineothrix	0/549	0/549
Klebsiella	0/17731	1/17731
Kluyvera	0/116	11/116
Kocuria	0/808	0/808
Kosakonia	0/111	0/111
Kurthia	0/80	0/80
Lachnoanaerobaculum	0/1221	0/1221
Lachnobacterium	0/14	0/14
Lachnoclostridium	0/1228	0/1228
Lachnospira	0/8580	0/8580
Lachnospiraceae_unclassified	0/66408	0/66408
Lachnotalea	0/13	0/13
Lacrimispora	0/2115	0/2115
Lacticaseibacillus	0/1840	0/1840
Lactiplantibacillus	0/1099	0/1099
Lactobacillus	0/8610	0/8610
Lactococcus	0/3244	0/3244
Lactonifactor	0/14	0/14
Lagierella	0/2	0/2
Lancefieldella	0/1414	0/1414
Lapidilactobacillus	0/24	0/24
Laribacter	0/31	0/31
Latilactobacillus	0/459	0/459
Lawsonella	0/58	0/58
Lawsonibacter	0/577	0/577
Leclercia	1/475	0/475
Leminorella	0/3	0/3
Lentihominibacter	0/641	0/641
Lentilactobacillus	0/597	0/597
Leptotrichia	0/2054	0/2054
Leuconostoc	0/1408	0/1408
Levilactobacillus	0/390	0/390
Levyella	0/50	0/50
Leyella	0/2095	0/2095
Ligilactobacillus	0/3242	0/3242
Limosilactobacillus	0/3385	0/3385
Listeria	0/4038	0/4038
Loigolactobacillus	0/113	0/113
Longibaculum	0/38	0/38
Longicatena	0/215	0/215
Luxibacter	0/15	0/15
Lysinibacillus	0/266	0/266
Mailhella	0/18	0/18
Marvinbryantia	0/42	0/42
Massilibacterium	0/2	0/2
Massilicoli	0/32	0/32
Massilioclostridium	0/9	0/9
Massilistercora	0/58	0/58
Mediterraneibacter	0/10530	0/10530
Megamonas	0/2166	0/2166
Megasphaera	0/4443	0/4443
Merdibacter	0/1	0/1
Merdimonas	0/119	0/119
Mesosutterella	0/487	0/487
Metamycoplasma	0/404	0/404
Methanobacterium	79/86	0/86
Methanobrevibacter	2505/2867	0/2867
Methanocorpusculum	0/107	0/107
Methanomassiliicoccus	0/71	0/71
Methanomethylophilus	0/161	0/161
Methanosphaera	0/292	0/292
Methylobacterium	0/340	0/340
Micrococcus	1/682	8/682
Microvirga	24/70	10/70
Mitsuokella	0/712	0/712
Mixta	0/86	0/86
Mobilibacterium	0/13	0/13
Mobilicoccus	0/16	0/16
Mobiluncus	0/343	0/343
Moellerella	0/9	0/9
Monoglobus	0/487	0/487
Morganella	0/472	0/472
Murdochiella	0/6	0/6
Muribaculum	0/2546	0/2546
Muricomes	0/42	0/42
Murimonas	0/5	0/5
Mycobacterium	13/925	11/925
Mycoplasma	0/142	0/142
Mycoplasmopsis	0/374	0/374
Negativibacillus	0/297	0/297
Negativicoccus	0/118	0/118
Neisseria	31/5178	0/5178
Neobacillus	7/58	0/58
Neofamilia	0/1	0/1
Nesterenkonia	0/144	0/144
Niallia	0/58	0/58
Niameybacter	0/2	0/2
Nigerium	0/1	0/1
Nitratidesulfovibrio	0/34	30/34
Nosocomiicoccus	0/23	0/23
Noviherbaspirillum	24/24	6/24
Numidum	0/1	0/1
Oceanobacillus	1/68	1/68
Odoribacter	0/3858	0/3858
Olegusella	0/23	0/23
Olsenella	0/1227	0/1227
Oribacterium	0/1777	0/1777
Oscillibacter	0/9165	0/9165
Oxalobacter	0/148	0/148
Paenibacillus	2/1005	0/1005
Paenisporosarcina	0/104	0/104
Pantoea	26/941	25/941
Parabacteroides	0/14479	0/14479
Paraclostridium	0/828	0/828
Paraeggerthella	0/24	0/24
Paramuribaculum	0/1014	0/1014
Paraprevotella	0/2037	0/2037
Parascardovia	0/36	0/36
Parasutterella	0/3456	0/3456
Paratractidigestivibacter	0/435	0/435
Parolsenella	0/213	0/213
Parvimonas	0/402	0/402
Paucimonas	0/1	0/1
Pauljensenia	0/1316	0/1316
Pediococcus	0/492	0/492
Pelistega	6/11	0/11
Pelosinus	0/11	0/11
Peptacetobacter	0/438	0/438
Peptococcus	0/39	0/39
Peptoniphilus	0/709	0/709
Peptostreptococcaceae_unclassified	0/245	0/245
Peptostreptococcus	0/912	0/912
Peribacillus	2/147	1/147
Phascolarctobacterium	0/7078	0/7078
Phocaeicola	0/16383	0/16383
Phoenicibacter	0/12	0/12
Phyllobacterium	47/54	0/54
Phytobacter	0/52	47/52
Pigmentiphaga	13/13	0/13
Planococcus	0/107	0/107
Plesiomonas	0/66	0/66
Pluralibacter	0/60	0/60
Porphyromonas	0/4761	0/4761
Pradoshia	0/9	0/9
Prevotella	0/16426	0/16426
Prevotellamassilia	0/584	0/584
Priestia	0/400	7/400
Propionibacterium	0/241	0/241
Proteus	0/1765	0/1765
Providencia	1/611	0/611
Pseudescherichia	0/70	0/70
Pseudobutyrivibrio	0/50	0/50
Pseudoflavonifractor	0/749	0/749
Pseudomonas	12671/13414	1633/13414
Pseudoruminococcus	0/868	0/868
Psychrobacillus	0/35	0/35
Pygmaiobacter	0/15	0/15
Pyramidobacter	0/87	0/87
Rahnella	0/133	1/133
Ralstonia	416/419	0/419
Raoultella	0/415	0/415
Raoultibacter	0/51	0/51
Rhodococcus	1/711	0/711
Rikenella	0/22	0/22
Risungbinella	1/1	0/1
Robertmurraya	0/20	0/20
Robinsoniella	0/27	0/27
Romboutsia	0/966	0/966
Roseateles	0/152	8/152
Roseburia	0/13720	0/13720
Rothia	0/3621	0/3621
Rubeoparvulum	0/1	0/1
Rubneribacter	0/35	0/35
Ruminiclostridium	1/61	0/61
Ruminobacter	0/53	0/53
Ruminococcus	0/25512	0/25512
Ruthenibacterium	0/1849	0/1849
Salinicola	0/53	0/53
Salmonella	0/4437	0/4437
Sarcina	0/243	0/243
Scardovia	0/178	0/178
Schaedlerella	0/75	0/75
Schleiferilactobacillus	0/84	0/84
Sedimentibacter	0/30	0/30
Segatella	0/9553	0/9553
Selenomonas	0/1906	0/1906
Sellimonas	0/679	0/679
Senegalimassilia	0/903	0/903
Serratia	4/1705	1543/1705
Slackia	0/1019	0/1019
Sneathia	0/781	0/781
Sodaliphilus	0/229	0/229
Solobacterium	0/1012	0/1012
Sphaerochaeta	0/59	0/59
Sphingomonas	1007/1116	54/1116
Sporanaerobacter	0/9	0/9
Sporolactobacillus	0/23	0/23
Staphylococcus	0/13932	0/13932
Stenotrophomonas	2078/2159	3/2159
Stomatobaculum	0/1007	0/1007
Streptococcus	1/24479	0/24479
Streptomyces	60/2806	102/2806
Stutzerimonas	1139/1324	4/1324
Subdoligranulum	0/7255	0/7255
Succinatimonas	0/26	0/26
Succiniclasticum	0/248	0/248
Succinivibrio	0/82	0/82
Superficieibacter	0/16	3/16
Sutterella	0/6129	0/6129
Synergistes	0/11	0/11
Terasakiella	0/8	0/8
Terrisporobacter	0/35	0/35
Thalassobacillus	0/6	0/6
Thomasclavelia	1/1614	0/1614
Timonella	0/5	0/5
Tissierella	0/44	0/44
Trabulsiella	0/5	0/5
Traorella	0/7	0/7
Treponema	0/2569	0/2569
Turicibacter	0/1053	0/1053
Turicimonas	0/366	0/366
Ureaplasma	0/81	0/81
Ureibacillus	0/24	0/24
Vagococcus	0/145	0/145
Varibaculum	0/220	0/220
Veillonella	0/6888	0/6888
Vescimonas	0/2119	0/2119
Vibrio	7234/7499	0/7499
Victivallis	0/361	0/361
Virgibacillus	0/78	0/78
Vitreoscilla	5/5	0/5
Waltera	0/6310	0/6310
Weissella	0/547	0/547
Winkia	0/58	0/58
Wujia	0/2588	0/2588
Xanthomonas	959/981	0/981
Yersinia	0/1173	76/1173
Yokenella	0/14	0/14

## Sheet: ST5C_Kynurenine_synth_capacity
Genus	TRP-KYN	KYN-KYNA	KYN-3HK	3HK-3HAO	3HAO-QA	QA_synthesis_II
Absicoccus	0/96	43/96	0/96	0/96	0/96	84/96
Acetanaerobacterium	0/27	0/27	0/27	0/27	1/27	0/27
Acetatifactor	0/199	194/199	0/199	0/199	1/199	0/199
Acetivibrio	0/67	64/67	0/67	0/67	0/67	47/67
Acetobacter	1/705	703/705	14/705	0/705	14/705	563/705
Acetomicrobium	0/42	38/42	0/42	0/42	0/42	1/42
Achromobacter	428/449	449/449	340/449	353/449	325/449	420/449
Acidaminococcus	0/1543	1508/1543	0/1543	0/1543	0/1543	392/1543
Acidiphilium	0/58	56/58	0/58	0/58	6/58	51/58
Acidovorax	296/365	362/365	27/365	228/365	17/365	330/365
Acinetobacter	0/7867	7839/7867	1472/7867	32/7867	6/7867	7644/7867
Actinobacillus	0/114	112/114	1/114	0/114	0/114	1/114
Actinobaculum	0/439	386/439	0/439	0/439	0/439	0/439
Actinomyces	0/7024	5544/7024	0/7024	0/7024	102/7024	5/7024
Acutalibacter	0/890	156/890	0/890	0/890	1/890	0/890
Adlercreutzia	0/1388	1304/1388	0/1388	0/1388	0/1388	32/1388
Aeromicrobium	20/110	107/110	1/110	75/110	2/110	106/110
Aeromonas	0/1183	1178/1183	3/1183	0/1183	0/1183	1154/1183
Afipia	1/117	116/117	13/117	1/117	0/117	100/117
Agathobacter	0/12048	11577/12048	6/12048	0/12048	0/12048	11328/12048
Agathobaculum	0/3843	3760/3843	0/3843	0/3843	0/3843	3/3843
Aggregatibacter	0/979	973/979	57/979	0/979	1/979	536/979
Agrobacterium	9/709	709/709	1/709	1/709	29/709	585/709
Akkermansia	0/5650	5425/5650	0/5650	0/5650	0/5650	5233/5650
Aliarcobacter	0/328	328/328	1/328	0/328	0/328	323/328
Alistipes	0/22616	14238/22616	234/22616	0/22616	0/22616	20712/22616
Alkalihalobacillus	15/18	11/18	0/18	15/18	0/18	18/18
Allisonella	0/177	168/177	0/177	0/177	0/177	0/177
Alloprevotella	0/825	584/825	0/825	0/825	0/825	356/825
Alloscardovia	0/105	99/105	0/105	0/105	0/105	0/105
Alterileibacterium	0/7	7/7	0/7	0/7	0/7	0/7
Amedibacillus	0/171	81/171	0/171	0/171	0/171	28/171
Amedibacterium	0/168	43/168	0/168	0/168	0/168	29/168
Anaerobiospirillum	0/389	378/389	0/389	0/389	0/389	365/389
Anaerobutyricum	0/2084	2030/2084	5/2084	0/2084	0/2084	1649/2084
Anaerococcus	0/467	290/467	0/467	0/467	0/467	48/467
Anaerocolumna	0/25	23/25	0/25	0/25	1/25	1/25
Anaerofustis	0/14	13/14	0/14	0/14	0/14	11/14
Anaeroglobus	0/1663	1519/1663	0/1663	0/1663	0/1663	0/1663
Anaeromassilibacillus	0/221	5/221	0/221	0/221	8/221	34/221
Anaeroplasma	0/26	22/26	0/26	0/26	0/26	1/26
Anaerosacchariphilus	0/63	62/63	0/63	0/63	0/63	1/63
Anaerosalibacter	0/15	15/15	0/15	0/15	0/15	10/15
Anaerosporobacter	0/10	10/10	0/10	0/10	0/10	10/10
Anaerosporomusa	0/1	1/1	0/1	0/1	0/1	1/1
Anaerostipes	0/7375	6905/7375	2/7375	0/7375	0/7375	5792/7375
Anaerotignum	0/2440	2377/2440	0/2440	0/2440	0/2440	1494/2440
Anaerotruncus	0/803	212/803	0/803	0/803	0/803	4/803
Anaerovibrio	0/446	394/446	0/446	0/446	0/446	294/446
Aneurinibacillus	10/18	18/18	0/18	11/18	0/18	18/18
Angelakisella	0/5	2/5	0/5	0/5	0/5	0/5
Arachnia	0/691	376/691	350/691	0/691	1/691	0/691
Arcanobacterium	0/89	83/89	0/89	0/89	0/89	0/89
Atlantibacter	0/174	174/174	0/174	0/174	0/174	170/174
Atopobium	0/1105	484/1105	0/1105	0/1105	0/1105	3/1105
Azonexus	0/25	25/25	0/25	0/25	0/25	24/25
Azospirillum	40/91	91/91	1/91	29/91	0/91	90/91
Bacilliculturomica	0/3	3/3	0/3	0/3	0/3	0/3
Bacillus	3433/5903	5872/5903	878/5903	1895/5903	1409/5903	5827/5903
Bacteroides	0/28848	28600/28848	475/28848	0/28848	2/28848	25086/28848
Bariatricus	0/13	12/13	0/13	0/13	0/13	9/13
Barnesiella	0/6155	6023/6155	17/6155	0/6155	0/6155	5023/6155
Beduini	0/5	5/5	0/5	0/5	4/5	0/5
Bifidobacterium	0/24380	23613/24380	0/24380	1/24380	0/24380	11137/24380
Bilophila	0/2625	2622/2625	0/2625	5/2625	0/2625	2338/2625
Blastococcus	14/49	44/49	3/49	36/49	2/49	44/49
Blautia	0/23195	19210/23195	9/23195	3/23195	22/23195	17566/23195
Brachyspira	0/414	358/414	0/414	0/414	0/414	0/414
Bradyrhizobium	639/954	951/954	62/954	319/954	17/954	917/954
Brevibacillus	117/179	170/179	2/179	36/179	17/179	176/179
Brevibacterium	17/1141	1133/1141	0/1141	342/1141	12/1141	789/1141
Bulleidia	0/91	63/91	0/91	0/91	0/91	0/91
Butyribacter	0/617	597/617	1/617	0/617	0/617	527/617
Butyricicoccus	0/3303	3058/3303	0/3303	0/3303	0/3303	340/3303
Butyricimonas	0/1311	1193/1311	9/1311	0/1311	0/1311	997/1311
Butyrivibrio	0/143	134/143	0/143	0/143	0/143	51/143
Campylobacter	0/27397	27254/27397	3/27397	0/27397	0/27397	2011/27397
Candidatus_Borkfalkia	0/149	140/149	0/149	0/149	0/149	138/149
Capnocytophaga	0/3592	3205/3592	7/3592	0/3592	0/3592	1/3592
Caproiciproducens	0/11	0/11	0/11	0/11	2/11	5/11
Cardiobacterium	0/623	603/623	319/623	0/623	0/623	3/623
Carnobacterium	0/191	148/191	2/191	0/191	1/191	0/191
Catenibacillus	0/6	6/6	0/6	0/6	0/6	6/6
Catenibacterium	0/2253	2020/2253	0/2253	0/2253	0/2253	1725/2253
Caulobacter	48/157	156/157	0/157	28/157	4/157	142/157
Cedecea	0/32	32/32	2/32	0/32	0/32	31/32
Cellulomonas	2/1131	894/1131	0/1131	28/1131	0/1131	178/1131
Cellulosilyticum	0/17	16/17	0/17	0/17	0/17	15/17
Centipeda	0/118	102/118	0/118	0/118	0/118	0/118
Cetobacterium	0/76	71/76	0/76	0/76	0/76	0/76
Chimaeribacter	0/15	15/15	0/15	0/15	0/15	15/15
Christensenella	0/47	46/47	0/47	0/47	0/47	0/47
Chryseobacterium	5/692	689/692	250/692	0/692	1/692	653/692
Citrobacter	0/3004	3004/3004	16/3004	0/3004	48/3004	2982/3004
Cloacibacillus	0/235	233/235	0/235	0/235	0/235	161/235
Clostridioides	0/1840	1837/1840	0/1840	0/1840	42/1840	1781/1840
Clostridium	0/25198	24303/25198	17/25198	16/25198	38/25198	12899/25198
Cohnella	1/57	13/57	2/57	1/57	0/57	56/57
Collinsella	0/11313	10411/11313	0/11313	0/11313	0/11313	9705/11313
Comamonas	194/465	453/465	19/465	155/465	63/465	316/465
Companilactobacillus	0/145	12/145	0/145	0/145	0/145	0/145
Coprobacillus	0/2002	1660/2002	0/2002	0/2002	155/2002	1424/2002
Coprobacter	0/506	500/506	6/506	0/506	0/506	396/506
Coprococcus	0/10100	9118/10100	0/10100	0/10100	5/10100	8891/10100
Corynebacterium	0/5704	5372/5704	1/5704	1/5704	9/5704	2059/5704
Criibacterium	0/8	8/8	0/8	0/8	0/8	0/8
Cronobacter	0/960	960/960	11/960	0/960	0/960	956/960
Cupriavidus	235/240	240/240	156/240	185/240	52/240	237/240
Cutibacterium	0/3002	2113/3002	0/3002	0/3002	0/3002	518/3002
Dechloromonas	0/45	44/45	3/45	0/45	0/45	41/45
Dermabacter	0/79	79/79	5/79	0/79	0/79	0/79
Desulfitobacterium	0/20	20/20	14/20	0/20	0/20	20/20
Desulfovibrio	0/1975	1966/1975	0/1975	5/1975	0/1975	1397/1975
Dialister	0/4336	2329/4336	2/4336	0/4336	1/4336	4/4336
Dielma	0/39	38/39	0/39	0/39	0/39	0/39
Dorea	0/3196	3015/3196	0/3196	1/3196	0/3196	2813/3196
Duncaniella	0/3803	3774/3803	0/3803	0/3803	0/3803	2859/3803
Duodenibacillus	0/561	461/561	0/561	0/561	0/561	325/561
Dysgonomonas	0/131	123/131	1/131	3/131	0/131	120/131
Dysosmobacter	0/3388	3323/3388	0/3388	0/3388	0/3388	30/3388
Edwardsiella	0/62	62/62	0/62	0/62	0/62	59/62
Eggerthella	0/2207	1982/2207	0/2207	0/2207	0/2207	1862/2207
Eikenella	0/317	279/317	4/317	0/317	1/317	77/317
Eisenbergiella	0/468	442/468	0/468	0/468	201/468	1/468
Elizabethkingia	0/328	328/328	292/328	0/328	0/328	325/328
Ellagibacter	0/595	515/595	0/595	0/595	0/595	534/595
Elusimicrobium	0/14	14/14	0/14	0/14	0/14	14/14
Emergencia	0/91	91/91	0/91	0/91	0/91	0/91
Enorma	0/175	162/175	0/175	0/175	0/175	5/175
Enterobacter	0/6726	6726/6726	15/6726	0/6726	36/6726	6647/6726
Enterocloster	0/2974	2749/2974	0/2974	0/2974	0/2974	1257/2974
Enterococcus	0/13641	13422/13641	11/13641	43/13641	11/13641	154/13641
Enteroscipio	0/23	18/23	0/23	0/23	0/23	0/23
Enterovibrio	0/33	33/33	1/33	0/33	0/33	32/33
Epilithonimonas	0/133	130/133	4/133	0/133	0/133	108/133
Erwinia	0/158	158/158	0/158	1/158	8/158	119/158
Escherichia	0/26165	26123/26165	128/26165	1/26165	0/26165	25826/26165
Eshraghiella	0/1180	1086/1180	4/1180	0/1180	0/1180	2/1180
Eubacteriales_Family_XIII_Incertae_Sedis_unclassified	0/1677	1411/1677	0/1677	22/1677	0/1677	474/1677
Eubacteriales_unclassified	0/11919	10779/11919	9/11919	0/11919	205/11919	3597/11919
Eubacterium	0/9034	8365/9034	4/9034	13/9034	0/9034	8385/9034
Evtepia	0/991	944/991	0/991	0/991	0/991	0/991
Exiguobacterium	288/322	296/322	0/322	293/322	0/322	284/322
Extibacter	0/16	16/16	0/16	15/16	0/16	14/16
Ezakiella	0/90	0/90	0/90	0/90	0/90	0/90
Faecalibacillus	0/2921	2731/2921	3/2921	0/2921	0/2921	2335/2921
Faecalibacter	0/7	7/7	0/7	0/7	0/7	7/7
Faecalibacterium	0/18486	9831/18486	1/18486	0/18486	1/18486	233/18486
Faecalicatena	0/1679	1575/1679	0/1679	13/1679	0/1679	976/1679
Faecalicoccus	0/137	125/137	1/137	0/137	0/137	116/137
Faecalimonas	0/754	636/754	0/754	0/754	0/754	679/754
Faecalitalea	0/204	64/204	0/204	0/204	0/204	190/204
Fannyhessea	0/1170	196/1170	0/1170	0/1170	0/1170	0/1170
Fenollaria	0/106	0/106	0/106	0/106	0/106	0/106
Fermentimonas	0/17	17/17	0/17	0/17	0/17	16/17
Fibrobacter	0/456	448/456	0/456	0/456	0/456	406/456
Filifactor	0/215	214/215	0/215	0/215	0/215	196/215
Finegoldia	0/225	199/225	1/225	0/225	0/225	0/225
Flaviflexus	0/98	96/98	0/98	0/98	0/98	0/98
Flavobacterium	583/1026	1020/1026	888/1026	893/1026	894/1026	975/1026
Flavonifractor	0/2018	1923/2018	0/2018	0/2018	0/2018	466/2018
Flexilinea	0/6	6/6	0/6	0/6	0/6	0/6
Francisella	0/119	119/119	27/119	0/119	0/119	119/119
Franconibacter	0/16	16/16	0/16	0/16	0/16	15/16
Fredinandcohnia	9/10	10/10	0/10	9/10	0/10	9/10
Frisingicoccus	0/136	129/136	0/136	0/136	1/136	113/136
Fructilactobacillus	0/67	38/67	0/67	0/67	0/67	0/67
Fusicatenibacter	0/7521	5933/7521	0/7521	1/7521	0/7521	5071/7521
Fusobacterium	0/2827	2224/2827	0/2827	0/2827	0/2827	1762/2827
Gabonibacter	0/17	17/17	0/17	0/17	0/17	15/17
Garciella	0/3	3/3	0/3	0/3	0/3	3/3
Gemella	0/1576	196/1576	0/1576	0/1576	0/1576	4/1576
Gemmiger	0/13866	13025/13866	0/13866	0/13866	0/13866	2524/13866
Gleimia	0/40	39/40	0/40	0/40	0/40	2/40
Gordonibacter	0/229	191/229	0/229	0/229	0/229	190/229
Gorillibacterium	0/2	1/2	0/2	0/2	0/2	2/2
Gracilibacillus	0/23	23/23	0/23	0/23	0/23	21/23
Granulicatella	0/1438	1072/1438	0/1438	0/1438	0/1438	2/1438
Haemophilus	0/3930	3826/3930	3/3930	0/3930	6/3930	1309/3930
Hafnia	0/189	189/189	0/189	0/189	1/189	185/189
Hallerella	0/75	74/75	0/75	0/75	0/75	67/75
Haloferax	0/44	44/44	0/44	44/44	0/44	40/44
Halorubrum	0/166	166/166	0/166	134/166	1/166	53/166
Harryflintia	0/6	1/6	0/6	0/6	0/6	0/6
Helicobacter	0/4517	4485/4517	0/4517	0/4517	1/4517	3996/4517
Hespellia	0/1	1/1	0/1	0/1	0/1	1/1
Heyndrickxia	35/108	108/108	0/108	14/108	0/108	61/108
Holdemanella	0/3887	3421/3887	7/3887	0/3887	0/3887	3535/3887
Holdemania	0/106	52/106	0/106	0/106	0/106	0/106
Hungatella	0/590	574/590	0/590	1/590	0/590	32/590
Hydrogeniiclostridium	0/22	1/22	0/22	0/22	0/22	0/22
Intestinibacter	0/331	330/331	0/331	0/331	0/331	264/331
Intestinimonas	0/313	295/313	0/313	14/313	1/313	4/313
Janthinobacterium	87/192	189/192	28/192	162/192	6/192	175/192
Johnsonella	0/23	22/23	0/23	0/23	0/23	0/23
Jonquetella	0/23	23/23	0/23	0/23	0/23	0/23
Kallipyga	0/5	0/5	0/5	0/5	0/5	0/5
Kineothrix	0/549	500/549	0/549	0/549	6/549	16/549
Klebsiella	1/17731	17730/17731	2/17731	0/17731	14098/17731	17614/17731
Kluyvera	0/116	116/116	6/116	0/116	0/116	114/116
Kocuria	5/808	782/808	0/808	11/808	0/808	495/808
Kosakonia	0/111	111/111	0/111	0/111	0/111	109/111
Kurthia	0/80	58/80	0/80	0/80	0/80	61/80
Lachnoanaerobaculum	0/1221	964/1221	0/1221	0/1221	0/1221	25/1221
Lachnobacterium	0/14	5/14	0/14	0/14	0/14	14/14
Lachnoclostridium	0/1228	1059/1228	6/1228	49/1228	23/1228	972/1228
Lachnospira	0/8580	8369/8580	2/8580	0/8580	0/8580	7840/8580
Lachnospiraceae_unclassified	0/66408	60416/66408	15/66408	181/66408	259/66408	37327/66408
Lachnotalea	0/13	13/13	0/13	0/13	0/13	3/13
Lacrimispora	0/2115	2072/2115	0/2115	0/2115	12/2115	18/2115
Lacticaseibacillus	0/1840	1732/1840	0/1840	0/1840	0/1840	12/1840
Lactiplantibacillus	0/1099	1038/1099	0/1099	0/1099	0/1099	67/1099
Lactobacillus	0/8610	1049/8610	0/8610	0/8610	0/8610	991/8610
Lactococcus	0/3244	3102/3244	1/3244	1/3244	0/3244	238/3244
Lactonifactor	0/14	14/14	0/14	0/14	0/14	14/14
Lagierella	0/2	1/2	0/2	0/2	0/2	0/2
Lancefieldella	0/1414	735/1414	0/1414	0/1414	0/1414	0/1414
Lapidilactobacillus	0/24	1/24	0/24	0/24	0/24	5/24
Laribacter	0/31	30/31	0/31	0/31	0/31	30/31
Latilactobacillus	0/459	359/459	0/459	0/459	0/459	2/459
Lawsonella	0/58	56/58	0/58	0/58	0/58	54/58
Lawsonibacter	0/577	567/577	0/577	0/577	0/577	4/577
Leclercia	0/475	475/475	0/475	0/475	0/475	458/475
Leminorella	0/3	3/3	0/3	0/3	0/3	3/3
Lentihominibacter	0/641	620/641	0/641	0/641	0/641	518/641
Lentilactobacillus	0/597	263/597	2/597	0/597	0/597	347/597
Leptotrichia	0/2054	1837/2054	1/2054	0/2054	0/2054	490/2054
Leuconostoc	0/1408	555/1408	1/1408	0/1408	0/1408	6/1408
Levilactobacillus	0/390	55/390	0/390	0/390	0/390	36/390
Levyella	0/50	50/50	0/50	0/50	0/50	0/50
Leyella	0/2095	1955/2095	5/2095	0/2095	0/2095	1209/2095
Ligilactobacillus	0/3242	569/3242	0/3242	3/3242	0/3242	629/3242
Limosilactobacillus	0/3385	2331/3385	0/3385	0/3385	0/3385	298/3385
Listeria	0/4038	4036/4038	0/4038	78/4038	0/4038	3722/4038
Loigolactobacillus	0/113	28/113	0/113	0/113	0/113	1/113
Longibaculum	0/38	27/38	0/38	0/38	0/38	0/38
Longicatena	0/215	202/215	0/215	0/215	0/215	0/215
Luxibacter	0/15	15/15	0/15	0/15	1/15	15/15
Lysinibacillus	11/266	244/266	0/266	40/266	37/266	228/266
Mailhella	0/18	18/18	0/18	0/18	0/18	10/18
Marvinbryantia	0/42	40/42	0/42	0/42	0/42	0/42
Massilibacterium	0/2	1/2	0/2	0/2	0/2	2/2
Massilicoli	0/32	0/32	0/32	0/32	0/32	0/32
Massilioclostridium	0/9	0/9	0/9	0/9	0/9	9/9
Massilistercora	0/58	47/58	0/58	13/58	0/58	0/58
Mediterraneibacter	0/10530	9588/10530	1/10530	6/10530	2/10530	8475/10530
Megamonas	0/2166	2097/2166	2/2166	0/2166	0/2166	1332/2166
Megasphaera	0/4443	4231/4443	0/4443	0/4443	2/4443	1621/4443
Merdibacter	0/1	1/1	0/1	0/1	0/1	0/1
Merdimonas	0/119	111/119	0/119	0/119	0/119	0/119
Mesosutterella	0/487	410/487	0/487	0/487	0/487	237/487
Metamycoplasma	0/404	0/404	0/404	0/404	0/404	0/404
Methanobacterium	0/86	78/86	1/86	0/86	1/86	79/86
Methanobrevibacter	0/2867	2819/2867	17/2867	0/2867	0/2867	2616/2867
Methanocorpusculum	0/107	101/107	0/107	0/107	0/107	94/107
Methanomassiliicoccus	0/71	69/71	0/71	0/71	0/71	59/71
Methanomethylophilus	0/161	160/161	0/161	0/161	0/161	142/161
Methanosphaera	0/292	282/292	254/292	0/292	0/292	261/292
Methylobacterium	14/340	339/340	0/340	0/340	3/340	308/340
Micrococcus	0/682	670/682	0/682	0/682	0/682	506/682
Microvirga	51/70	70/70	0/70	0/70	0/70	17/70
Mitsuokella	0/712	631/712	0/712	0/712	0/712	1/712
Mixta	0/86	86/86	0/86	0/86	1/86	85/86
Mobilibacterium	0/13	13/13	0/13	0/13	0/13	8/13
Mobilicoccus	0/16	16/16	13/16	0/16	0/16	14/16
Mobiluncus	0/343	327/343	0/343	0/343	0/343	124/343
Moellerella	0/9	9/9	0/9	0/9	0/9	9/9
Monoglobus	0/487	9/487	0/487	0/487	1/487	0/487
Morganella	0/472	462/472	0/472	0/472	4/472	457/472
Murdochiella	0/6	6/6	0/6	0/6	0/6	0/6
Muribaculum	0/2546	2466/2546	0/2546	0/2546	0/2546	2228/2546
Muricomes	0/42	42/42	0/42	0/42	0/42	39/42
Murimonas	0/5	5/5	0/5	0/5	0/5	5/5
Mycobacterium	9/925	920/925	2/925	8/925	2/925	902/925
Mycoplasma	0/142	9/142	0/142	0/142	0/142	0/142
Mycoplasmopsis	0/374	20/374	0/374	0/374	0/374	0/374
Negativibacillus	0/297	217/297	0/297	0/297	0/297	2/297
Negativicoccus	0/118	5/118	0/118	0/118	0/118	0/118
Neisseria	0/5178	5130/5178	225/5178	1/5178	2410/5178	3668/5178
Neobacillus	45/58	56/58	7/58	32/58	7/58	44/58
Neofamilia	0/1	0/1	0/1	0/1	0/1	0/1
Nesterenkonia	6/144	143/144	0/144	7/144	0/144	118/144
Niallia	0/58	58/58	0/58	0/58	0/58	56/58
Niameybacter	0/2	2/2	0/2	0/2	0/2	2/2
Nigerium	0/1	1/1	1/1	0/1	0/1	0/1
Nitratidesulfovibrio	0/34	34/34	0/34	0/34	0/34	31/34
Nosocomiicoccus	0/23	20/23	0/23	0/23	0/23	0/23
Noviherbaspirillum	7/24	24/24	0/24	1/24	0/24	18/24
Numidum	0/1	1/1	0/1	0/1	0/1	1/1
Oceanobacillus	42/68	66/68	0/68	33/68	1/68	28/68
Odoribacter	0/3858	3714/3858	13/3858	0/3858	0/3858	3372/3858
Olegusella	0/23	23/23	0/23	0/23	0/23	0/23
Olsenella	0/1227	1139/1227	0/1227	0/1227	0/1227	1025/1227
Oribacterium	0/1777	1523/1777	0/1777	0/1777	0/1777	3/1777
Oscillibacter	0/9165	8731/9165	0/9165	0/9165	0/9165	116/9165
Oxalobacter	0/148	117/148	0/148	0/148	0/148	114/148
Paenibacillus	48/1005	454/1005	132/1005	70/1005	25/1005	997/1005
Paenisporosarcina	104/104	4/104	0/104	41/104	69/104	100/104
Pantoea	22/941	937/941	6/941	11/941	583/941	884/941
Parabacteroides	0/14479	14381/14479	76/14479	0/14479	0/14479	13340/14479
Paraclostridium	0/828	816/828	0/828	0/828	0/828	506/828
Paraeggerthella	0/24	23/24	0/24	0/24	0/24	23/24
Paramuribaculum	0/1014	1013/1014	0/1014	0/1014	0/1014	932/1014
Paraprevotella	0/2037	1957/2037	7/2037	0/2037	0/2037	1898/2037
Parascardovia	0/36	36/36	0/36	0/36	0/36	0/36
Parasutterella	0/3456	1490/3456	0/3456	0/3456	0/3456	804/3456
Paratractidigestivibacter	0/435	359/435	0/435	0/435	0/435	395/435
Parolsenella	0/213	197/213	0/213	0/213	0/213	185/213
Parvimonas	0/402	50/402	0/402	0/402	0/402	3/402
Paucimonas	0/1	1/1	0/1	0/1	0/1	1/1
Pauljensenia	0/1316	1043/1316	0/1316	0/1316	0/1316	0/1316
Pediococcus	0/492	82/492	0/492	0/492	0/492	0/492
Pelistega	0/11	11/11	0/11	0/11	2/11	0/11
Pelosinus	0/11	11/11	0/11	0/11	0/11	10/11
Peptacetobacter	0/438	416/438	0/438	0/438	0/438	281/438
Peptococcus	0/39	39/39	0/39	0/39	0/39	27/39
Peptoniphilus	0/709	671/709	0/709	0/709	0/709	481/709
Peptostreptococcaceae_unclassified	0/245	157/245	0/245	0/245	0/245	11/245
Peptostreptococcus	0/912	884/912	0/912	0/912	0/912	718/912
Peribacillus	131/147	143/147	54/147	127/147	58/147	137/147
Phascolarctobacterium	0/7078	6251/7078	0/7078	0/7078	0/7078	4/7078
Phocaeicola	0/16383	16164/16383	507/16383	0/16383	3/16383	13433/16383
Phoenicibacter	0/12	11/12	0/12	0/12	0/12	10/12
Phyllobacterium	25/54	54/54	1/54	41/54	0/54	53/54
Phytobacter	0/52	52/52	6/52	0/52	0/52	51/52
Pigmentiphaga	12/13	13/13	0/13	3/13	9/13	12/13
Planococcus	96/107	57/107	0/107	102/107	0/107	60/107
Plesiomonas	0/66	66/66	0/66	0/66	0/66	61/66
Pluralibacter	0/60	60/60	0/60	0/60	0/60	60/60
Porphyromonas	0/4761	140/4761	0/4761	0/4761	0/4761	2021/4761
Pradoshia	0/9	9/9	0/9	0/9	0/9	0/9
Prevotella	0/16426	15409/16426	14/16426	0/16426	0/16426	11202/16426
Prevotellamassilia	0/584	561/584	0/584	0/584	0/584	285/584
Priestia	228/400	386/400	129/400	161/400	188/400	388/400
Propionibacterium	0/241	241/241	1/241	0/241	0/241	207/241
Proteus	0/1765	1763/1765	20/1765	0/1765	0/1765	1738/1765
Providencia	29/611	610/611	1/611	0/611	6/611	610/611
Pseudescherichia	0/70	70/70	0/70	0/70	0/70	66/70
Pseudobutyrivibrio	0/50	30/50	0/50	0/50	0/50	47/50
Pseudoflavonifractor	0/749	729/749	0/749	0/749	0/749	90/749
Pseudomonas	8269/13414	13413/13414	2499/13414	3057/13414	311/13414	13094/13414
Pseudoruminococcus	0/868	14/868	3/868	0/868	0/868	737/868
Psychrobacillus	32/35	12/35	0/35	23/35	5/35	3/35
Pygmaiobacter	0/15	13/15	0/15	0/15	0/15	0/15
Pyramidobacter	0/87	87/87	0/87	0/87	0/87	0/87
Rahnella	0/133	130/133	0/133	0/133	0/133	128/133
Ralstonia	408/419	419/419	258/419	196/419	32/419	414/419
Raoultella	0/415	414/415	0/415	0/415	0/415	406/415
Raoultibacter	0/51	48/51	0/51	0/51	0/51	2/51
Rhodococcus	398/711	704/711	150/711	412/711	269/711	687/711
Rikenella	0/22	20/22	1/22	0/22	0/22	22/22
Risungbinella	1/1	1/1	0/1	0/1	0/1	1/1
Robertmurraya	0/20	20/20	0/20	0/20	0/20	7/20
Robinsoniella	0/27	27/27	0/27	0/27	0/27	24/27
Romboutsia	0/966	877/966	0/966	0/966	0/966	469/966
Roseateles	132/152	149/152	5/152	106/152	17/152	145/152
Roseburia	0/13720	9157/13720	7/13720	0/13720	1/13720	10863/13720
Rothia	0/3621	3083/3621	11/3621	0/3621	6/3621	2/3621
Rubeoparvulum	0/1	1/1	0/1	0/1	0/1	0/1
Rubneribacter	0/35	30/35	0/35	0/35	0/35	26/35
Ruminiclostridium	0/61	59/61	1/61	1/61	0/61	46/61
Ruminobacter	0/53	53/53	0/53	0/53	0/53	48/53
Ruminococcus	0/25512	11182/25512	32/25512	1/25512	1/25512	19465/25512
Ruthenibacterium	0/1849	1526/1849	0/1849	0/1849	0/1849	13/1849
Salinicola	2/53	53/53	0/53	7/53	0/53	48/53
Salmonella	0/4437	4437/4437	0/4437	1/4437	0/4437	4431/4437
Sarcina	0/243	236/243	0/243	0/243	0/243	1/243
Scardovia	0/178	166/178	0/178	0/178	0/178	0/178
Schaedlerella	0/75	54/75	0/75	0/75	0/75	36/75
Schleiferilactobacillus	0/84	0/84	0/84	0/84	0/84	0/84
Sedimentibacter	0/30	26/30	3/30	18/30	0/30	5/30
Segatella	0/9553	9432/9553	58/9553	0/9553	0/9553	6864/9553
Selenomonas	0/1906	1669/1906	0/1906	0/1906	0/1906	139/1906
Sellimonas	0/679	598/679	0/679	0/679	0/679	571/679
Senegalimassilia	0/903	786/903	0/903	0/903	0/903	850/903
Serratia	1582/1705	1705/1705	4/1705	1/1705	148/1705	1683/1705
Slackia	0/1019	921/1019	0/1019	0/1019	0/1019	837/1019
Sneathia	0/781	735/781	0/781	0/781	0/781	0/781
Sodaliphilus	0/229	226/229	0/229	0/229	0/229	0/229
Solobacterium	0/1012	410/1012	0/1012	0/1012	0/1012	0/1012
Sphaerochaeta	0/59	52/59	0/59	0/59	0/59	0/59
Sphingomonas	284/1116	1103/1116	7/1116	677/1116	41/1116	1055/1116
Sporanaerobacter	0/9	9/9	0/9	0/9	0/9	5/9
Sporolactobacillus	0/23	23/23	0/23	0/23	0/23	10/23
Staphylococcus	3/13932	5621/13932	22/13932	30/13932	0/13932	443/13932
Stenotrophomonas	1386/2159	2157/2159	2057/2159	2023/2159	1989/2159	2036/2159
Stomatobaculum	0/1007	870/1007	0/1007	0/1007	0/1007	1/1007
Streptococcus	0/24479	23637/24479	12/24479	0/24479	0/24479	8533/24479
Streptomyces	1292/2806	2805/2806	374/2806	2130/2806	284/2806	2744/2806
Stutzerimonas	0/1324	1323/1324	1/1324	1/1324	1/1324	1270/1324
Subdoligranulum	0/7255	6896/7255	0/7255	0/7255	0/7255	401/7255
Succinatimonas	0/26	26/26	0/26	0/26	0/26	21/26
Succiniclasticum	0/248	209/248	0/248	0/248	0/248	0/248
Succinivibrio	0/82	82/82	0/82	0/82	0/82	72/82
Superficieibacter	0/16	16/16	0/16	0/16	0/16	16/16
Sutterella	0/6129	5596/6129	0/6129	0/6129	0/6129	5352/6129
Synergistes	0/11	11/11	0/11	0/11	0/11	10/11
Terasakiella	0/8	8/8	1/8	0/8	0/8	7/8
Terrisporobacter	0/35	35/35	0/35	0/35	0/35	32/35
Thalassobacillus	6/6	6/6	0/6	6/6	0/6	5/6
Thomasclavelia	0/1614	662/1614	0/1614	3/1614	3/1614	1455/1614
Timonella	0/5	4/5	0/5	0/5	0/5	5/5
Tissierella	0/44	40/44	3/44	0/44	0/44	14/44
Trabulsiella	0/5	5/5	0/5	0/5	0/5	5/5
Traorella	0/7	2/7	0/7	0/7	0/7	0/7
Treponema	0/2569	1250/2569	1/2569	0/2569	0/2569	41/2569
Turicibacter	0/1053	1027/1053	0/1053	0/1053	1/1053	1/1053
Turicimonas	0/366	321/366	0/366	0/366	0/366	312/366
Ureaplasma	0/81	0/81	0/81	0/81	0/81	0/81
Ureibacillus	2/24	18/24	0/24	2/24	1/24	16/24
Vagococcus	0/145	138/145	0/145	5/145	0/145	1/145
Varibaculum	0/220	205/220	0/220	0/220	0/220	194/220
Veillonella	0/6888	4800/6888	0/6888	0/6888	0/6888	2/6888
Vescimonas	0/2119	2101/2119	0/2119	1/2119	0/2119	4/2119
Vibrio	1/7499	7497/7499	3397/7499	14/7499	16/7499	7452/7499
Victivallis	0/361	312/361	0/361	0/361	0/361	314/361
Virgibacillus	67/78	77/78	0/78	50/78	9/78	53/78
Vitreoscilla	0/5	5/5	1/5	4/5	1/5	5/5
Waltera	0/6310	5823/6310	0/6310	0/6310	0/6310	21/6310
Weissella	0/547	99/547	0/547	0/547	0/547	0/547
Winkia	0/58	55/58	0/58	0/58	0/58	0/58
Wujia	0/2588	2250/2588	0/2588	0/2588	0/2588	2275/2588
Xanthomonas	100/981	981/981	954/981	887/981	884/981	957/981
Yersinia	3/1173	1173/1173	0/1173	0/1173	0/1173	1168/1173
Yokenella	0/14	14/14	0/14	0/14	0/14	14/14

[truncated: 3 more sheets: ST6A_Indoles_comb_score, ST6B_Serotonin_comb_score, ST6C_Kynurine_comb_score]
